# Supplementary material
Source: PubMed Central journal article supplement (PMC6461398)
Supplement: NIHMS1510057-supplement-313854_Acknowledgment.pdf [file NIHMS1510057-supplement-313854_Acknowledgment.pdf]

## Gemma Bridges-Lyman

---

**From:** Hotamisligil, Gokhan S. <ghotamis@hsph.harvard.edu>  
**Sent:** Sunday, October 14, 2018 5:09 PM  
**To:** circres  
**Cc:** Chris Glembotski; Erik Blackwood  
**Subject:** Re: Blackwood et al Circulation Research Manuscript Acknowledgement CIRCRES/2018/313854DR1

\*\*\* **CAUTION:** This email originated from outside of the **American Heart Association**. Do **not** click links or open attachments unless you recognize the sender and know the content is safe. \*\*\*

Dear Editors of Circulation Research,

I am writing to confirm my acceptance of the acknowledgment as outlined by Dr. Glembotski in the below message.

Sincerely,

Gökhan Hotamisligil

=====  
Gökhan S. Hotamisligil, M.D., Ph.D.  
James S. Simmons Professor of Genetics & Metabolism  
Chair, Department of Genetics & Complex Diseases  
Sabri Ülker Center for Metabolic Research  
Assoc. Member, Harvard-MIT Broad Institute, Harvard Stem Cell Institute

Harvard TH Chan School of Public Health  
[665 Huntington Avenue Boston, MA 02115](https://www.harvard.edu/665-Huntington-Avenue-Boston-MA-02115)  
Building I, Room 605  
Tel : [617 432 1950](tel:6174321950) (direct)  
Fax : [617 432 1941](tel:6174321941) (direct)  
Web:<http://hsph.harvard.edu/GSH-LAB/>  
eMail :[ghotamis@hsph.harvard.edu](mailto:ghotamis@hsph.harvard.edu)  
=====

On 10/11/18 5:52 PM, Chris Glembotski wrote:

Dear Gokhan,

Thank you again for generously allowing us to use your ATF6<sup>fl/fl</sup> mice.

I'm happy to say that the paper has been conditionally accepted in Circulation Research.

One of the conditions for final acceptance is the following:

**- All persons acknowledged by name in the manuscript must send an email to [CircRes@circresearch.org](mailto:CircRes@circresearch.org) citing their permission to be acknowledged.**

So, assuming you agree to be acknowledged for letting us use your mice, if would be so kind as to forward this message to the e-mail address above stating your agreement, we would very much appreciate it. If you do agree with with this, can you **please copy me on your message to the journal** to make sure I am apprised of your response?
