# Supplementary material
Source: PubMed Central journal article supplement (PMC6461398)
Supplement: NIHMS1510057-supplement-313854_Online_Supplement.pdf [file NIHMS1510057-supplement-313854_Online_Supplement.pdf]

## Supplemental Material

### Detailed Methods

#### Laboratory animals

The research reported in this article has been reviewed and approved by the San Diego State University Institutional Animal Care and Use Committee (IACUC), and conforms to the Guide for the Care and Use of Laboratory Animals published by the National Research Council. ATF6-floxed (ATF6<sup>fl/fl</sup>) mice were a generous gift from Dr. Gokhan S. Hotamisligil. Briefly, ATF6-floxed mice were generated with a targeting construct flanking exons 8 and 9 of ATF6 with LoxP sequences on a C57B/6J background, as previously described<sup>1</sup>. In previous studies we reported that there were no gender differences on the effects of ATF6 on cardiac structure and function in mice<sup>2</sup>. Additionally, in unpublished studies with the ATF6<sup>fl/fl</sup> mice used in this paper, there were no gender differences in cardiac function or survival upon ATF6 deletion at baseline in mouse models of hypertrophy. Due to these observations, and in an attempt to decrease the total number of mice needed to adequately power the study, only male mice were used here. To determine the numbers of animals a predictive power analysis necessary to achieve 5% error and 80% power was used in combination with empirical determination of numbers of animals, the latter of which was based on pilot experiments designed to determine, for example, surgery mortality rates, which in the studies here were < 5%, and the approximate magnitude of changes in the measured parameters. All mice used in the experiments reported here were randomized and assigned a coded number to which the investigator carrying out the experiments was blinded.

#### Animal numbers

A total of 184 mice were used for this study. ATF6<sup>fl/fl</sup> C57BL/6J mice injected with AAV9-Con (Con) (n=81) and their ATF6<sup>fl/fl</sup> littermates injected with AAV9-Cre (ATF6 cKO) (n=80); for certain experimental paradigms Con and ATF6 cKO mice were subsequently injected with either AAV9-Con (n=37), AAV9-Rheb (n=13) or AAV9-ATF6 (n=24); ATF6 TG C57BL/6J mice (n=4) and their non-transgenic littermates (n=3). Male wild-type C57BL/6J mice were purchased from Jackson Laboratories for the TAC time course experiment (n=16). All animals were fed *ad libitum* for all experimental purposes and kept on a traditional 12-hour light/dark cycle. All animal sacrifice and tissue harvest was consistently performed between the hours of 12pm-3pm when we have observed animals to be in a fasted and sedentary state.

## Cultured cardiac myocytes (NRVM) and experimental design

Neonatal rat ventricular myocytes (NRVMs) were isolated via enzymatic digestion, purified by Percoll density gradient centrifugation, and maintained in Dulbecco's modified Eagle's medium (DMEM)/F12 supplemented with 10% fetal bovine serum (FBS) and antibiotics (100 units/ml penicillin and 100 µg/ml streptomycin) on plastic culture plates that had been pre-treated with 5 µg/ml fibronectin, as previously described<sup>3</sup>. For all NRVM experiments, plating density was maintained at  $2.5 \times 10^5$  cells/well on 12-well plates. Sixteen hours after plating, NRVM were subjected to respective treatments. For stimulated *in vitro* hypertrophy in NRVM, an initial period of serum starvation was implemented by replacing all culture media with 0.5 ml of glucose-free DMEM for 48 hours. NRVM culture media was then replaced with DMEM/F12 supplemented with BSA (1 mg/ml) containing either control, phenylephrine (50 µM) or IGF1 (100ng/ml) for an additional 48 hours. Experiments in which Lonafarnib (2 µM; Cayman Chemical, Cas#193275-84-2), rapamycin (20nM; Sigma-Aldrich), cyclohexamide (100 µg/ml; Sigma-Aldrich, Cat#C1988) or 4-phenylbutyrate (100 µM; Sigma-Aldrich, Cat#SML0309) were administered was performed as previously described<sup>4-7</sup>, treatment was performed after serum starvation in conjunction with respective phenylephrine or IGF1 administration. Images were obtained with an IX70 fluorescence microscope (Olympus, Melville, NY). For *in vitro* chemical UPR activation, sixteen hours after plating NRVM and AMVM were treated with tunicamycin (10 µg/ml) for 24 hours in DMEM/F12 supplemented with bovine serum albumin (BSA) (1 mg/ml) for NRVM. For *in vitro* ischemia/reperfusion (I/R), ischemia was simulated by replacing all culture media with 0.5 ml of glucose-free DMEM containing 2% dialyzed FBS, then incubated at 0.1% O<sub>2</sub> in a hypoxia chamber with an oxygen controller (ProOx P110 oxygen controller, Biospherix, Parish, NY) for 8 hours or 3 hours for NRVM or AMVM, respectively, as previously described<sup>3</sup>. Reperfusion was simulated by replacing culture media with DMEM/F12 supplemented with BSA (1 mg/ml) for NRVM or maintaining media for AMVM and incubating at 21% O<sub>2</sub> for an additional 24 hours.

## Immunoblotting

NRVM were lysed and subjected to immunoblot analysis, as previously described<sup>3</sup>. In brief, cultures were lysed with VC lysis buffer made from 20 mM Tris-HCl (pH 7.5), 150 mM NaCl, 0.1% SDS, 1% Triton X-100, protease inhibitor cocktail (Roche Diagnostics, Indianapolis, IN) and phosphatase inhibitor cocktail (Roche Diagnostics). Mouse heart tissues were homogenized in modified RIPA buffer with 2% SDS. Lysates were clarified by centrifugation at 15,000xg for 15 min at 4°C, and the protein concentration was determined using DC protein assay (Bio-Rad, Hercules, CA). Samples comprising 15 µg of protein were mixed with Laemmli sample buffer, boiled, then subjected to SDS-PAGE followed by transfer onto PVDF membranes for immunoblotting. Full-length Atf6 (p90) was detected with an antibody from SAB Signalway Antibody (1:1000, cat# 32008,

College Park, MD), while active Atf6 (p50) was detected with an antibody from Proteintech (1:1000, cat# 24169-1-AP, Rosemont, IL). Other antibodies used include: anti-KDEL antibody (1:8,000, cat# ADI-SPA-827, Enzo Life Sciences, Farmingdale, NY), which was used to detect GRP78, anti-IRE1 (1:500, cat# sc-390960, Santa Cruz), anti-XBP1s (1:1000, cat# 619502, BioLegend, San Diego, CA), anti-phospho-PERK (1:1000, cat# 3179, Cell Signaling), anti-PERK (1:1000, cat# 3192, Cell Signaling), anti-Gapdh (1:25000, cat# G109a, Fitzgerald Industries International Inc.), anti- $\beta$ -actin (1:1000, cat# sc-47778, Santa Cruz), and anti-FLAG (1:3,000, cat#F1804, Sigma-Aldrich, St. Louis, MO). The following antibodies were purchased from Cell Signaling (Danvers, MA): anti-RHEB (1:1,000, cat#13879s), anti-Phospho-mTOR (Ser2448, 1:1,000, cat#2971s), anti-mTOR (1:1,000, cat#2972s), anti-Phospho-AKT (Ser473, 1:1,000, cat#9271s), anti-Phospho-ATK (Thr308, 1:1000, cat#13038s), anti-AKT (1:1,000, cat#9272s), anti-Phospho-S6K (1:1,000, cat#9205s), anti-S6K (1:1,000, cat#9202s), anti-Phospho-4EBP (1:1,000, cat#2855s), anti-4EBP (1:1,000, cat#9452s), anti-Phospho-TSC2 (Thr1462, 1:1000, 3617s), anti-TSC2 (1:1000, 3990s), anti-Phospho-ERK1/2 (Thr202/Tyr204, 1:1000, 9101s), and anti-ERK1/2 (1:1000, 9102s).

## **Adenovirus**

Recombinant adenoviruses (AdV) encoding 3XFLAG-tagged constitutively active ATF6, ATF6 $\alpha$ (1-373), 3XFLAG-tagged transcriptionally dead ATF6, ATF6 $\alpha$ (94-373), and 3XFLAG-tagged full-length inactive ATF6, ATF6 $\alpha$ (1-670) were generated using AdEasy system essentially as previously described<sup>8</sup>. Transduction of NRVM was performed by incubating cultures for 5 hours with the appropriate AdV at a multiplicity of infection of one.

## **Plasmid transfection**

Transfection of plasmids into NRVM was achieved using electroporation as previously described<sup>9</sup>. Briefly, 1 million NRVM were suspended in 300  $\mu$ l DMEM/F12 supplemented with BSA (1 mg/ml) and mixed with 10  $\mu$ g of CMV-Flag-Rheb (AddGene plasmid #19996), or a Rheb promoter-luciferase construct of choice (see below), or an empty vector control plasmid. Subsequently, each mixture was then electroporated in a Bio-Rad gene pulser at 500 V, 25 microfarads, 100  $\Omega$  in a 0.2 cm gap cuvette. Transfected NRVM viability is approximately 50% and were then plated into four-chamber Lab Tek chamber slides at  $0.75 \times 10^5$  NRVM per 2 cm<sup>2</sup> chamber.

## **Rheb promoter-luciferase constructs**

The promoter region of the rat RHEB gene spanning nucleotides -1067 to

+123 was amplified by PCR using ggatcgacgcgctcagtagcctgttgcaaaa as the forward primer, which introduced an MluI site (underlined) just 5' of rat RHEB -1067, and ggatcgctcgagcttgtagcCTgGTCAGC as the reverse primer, which introduced an XhoI site (underlined) just 3' of rat RHEB +123. Upper case nucleotides match those in the rat RHEB gene. The amplified product was then cloned into pGL2p to generate rat-RHEB(-1067/+123)-Luc. Truncated versions of rat-RHEB luciferase were cloned into pGL2p using a similar strategy and the same reverse primer coupled with the following forward primers: ggaacgacgcgtTCACCACCCACACTAAGC (-723), and ggaacgacgcgtGAACAGTGTCTCTCCTTGGC (-390) to generate rat-RHEB(-723/+123)-Luc and rat-RHEB(-390/+123)-Luc, respectively. Upper case nucleotides of these primers correspond to rat RHEB gene sequences. Informatics analyses identified putative ER stress response elements in the rat RHEB gene at nucleotide positions -754 to -736 and -628 to -610 in the rat RHEB gene, which we called ERSE-2 and ERSE-1, respectively. These elements in rat-RHEB(-1067/+123)-Luc were mutated by site-directed mutagenesis in ways predicted to ablate ATF6 binding using RHEB-ERSE-2 mut sense primer, CCCACAGTTCCTCAGaacaatAATAAAGCTTAGTCAC and RHEB-ERSE-2 mut antisense primer, GTGACTAAGCTTTATTatggtCTGAGGAACTGTGGG RHEB-ERSE-1 mut sense primer, GCCCGTCAGCTAGGGaacaatCGCCTCACGCC, and RHEB-ERSE-1 mut antisense primer, GGCGTGAGGCGatggtCCCTAGCTGACGGGC. PCR-based mutagenesis was performed using the QuikChange XL Site-Directed Mutagenesis Kit (Agilent Technologies, Santa Clara, CA). Lower case letters represent mutated nucleotides; upper case letters represent nucleotides that are identical to those in the rat RHEB gene. Plasmids were transfected into NRVM and luciferase activity was determined as previously described<sup>3</sup>.

### **Luciferase reporter assay**

Luciferase reporter assays were performed as previously described<sup>3</sup>. Briefly, suspended NRVMs were co-transfected by electroporation with Rheb promoter-luciferase constructs described above, human-Hspa5(-284/+221), or rat-Catalase(-1161/+131) promoter-luciferase constructs previously described<sup>3, 10</sup> along with pCH110 plasmids encoding SV40-beta-galactosidase and pGL2B, as described previously<sup>11</sup>. NRVMs were plated overnight and then infected with different forms of AdV-ATF6 or subjected to respective experimental paradigms. NRVMs were lysed after 48 h, and the activities of luciferase and beta-galactosidase were measured using an Optocompt II luminometer (MGM Instruments, Hamden, CT).

## **Small interfering RNA (siRNA) transfection**

Transfection of siRNA into NRVM was achieved using HiPerfect Transfection Reagent (Qiagen, Valencia, CA) following the vendor's protocol as previously described<sup>3</sup>. Briefly, NRVM culture medium was replaced with DMEM/F12 supplemented with 0.5% FBS without antibiotics, 120 nM siRNA, and 1.25  $\mu$ l HiPerfect / 1  $\mu$ l siRNA, then incubated for 16 hours, after which the culture medium was replaced with DMEM/F12 supplemented with BSA (1 mg/ml) for an additional 48 hours. The following targeting siRNAs were used: rat ATF6 (assay ID# RSS315363, Stealth siRNA, Thermo Fisher), rat RHEB (assay ID# RSS352522, Stealth siRNA, Thermo Fisher), rat PERK (assay ID# s132055, Silencer Select siRNA, Thermo Fisher), and rat IRE1 (assay ID# RSS363210, Stealth siRNA, Thermo Fisher). A non-targeting sequence (cat# 12935300, Thermo Fisher) was used as a control siRNA.

## **Immunocytofluorescence (ICF) and immunohistochemistry**

NRVM were plated on fibronectin and laminin-coated glass chamber slides, respectively as previously described<sup>3</sup>. Briefly, cells were fixed with 4% paraformaldehyde, followed by permeabilization with 0.5% Triton-X. Adult mouse hearts were paraffin-embedded after fixation in neutral buffered 10% formalin via abdominal aorta retroperfusion as previously described<sup>3</sup>. Primary antibodies used were anti- $\alpha$ -actinin (1:200, cat# A7811, Sigma-Aldrich), anti-FLAG (1:200, cat#F1804, Sigma-Aldrich), and anti-laminin (1:30, cat# L9393, Sigma-Aldrich). Slides were incubated with appropriate fluorophore-conjugated secondary antibodies (1:100, Jackson ImmunoResearch Laboratories, West Grove, PA) followed by nuclei counter stain Topro-3 (1:1000, Thermo Fisher). To validate specificity of FLAG staining, NRVM were transfected with an empty vector plasmid and co-stained with the FLAG antibody as represented in the respective figures. Images were obtained using laser scanning confocal microscopy on an LSM 710 confocal laser scanning microscope (Carl Zeiss, Oberkochen, Germany).

## Quantitative real-time PCR (qRT-PCR)

Total RNA was isolated from NRVM or mouse hearts as previously described<sup>3</sup> using Quick-RNA MiniPrep kit (Zymo Research, Irvine, CA) or RNeasy Mini kit (Qiagen), respectively. cDNA synthesis was performed using SuperScript III First-Strand Synthesis System (Thermo Fisher). qRT-PCR was performed using Maxima SYBR Green/ROX qPCR Master Mix in a StepOnePlus RT-PCR System (Thermo Fisher). All qPCR probes were obtained from Integrated DNA Technologies, as previously described<sup>3,7</sup>. Rheb-specific qPCR primers are listed below:

| Gene (rat)   | Forward Primer         | Reverse Primer          |
|--------------|------------------------|-------------------------|
| Rheb - 1     | CAGCAGGGCAGGATGAATA    | GCTTGCCGTGGATAACTTTAAT  |
| Rheb - 2     | AAGATGCCTCAGTCCAAGTC   | GATCAGCTTGGTGAATGTGTTT  |
|              |                        |                         |
| Gene (mouse) |                        |                         |
| Rheb - 1     | CCATGGCAAGTTGTTGGATATG | TCTTCATAGCTGATCACCCCTTC |
| Rheb - 2     | ACGTCTGACTCTGTCCAATG   | TGCCAACAGGAGGCAATAA     |

## Adeno-Associated virus serotype 9 (AAV9)

The plasmid encoding the human cardiac troponin T promoter driving Cre-recombinase was provided as a gift from Dr. Oliver Muller<sup>9</sup>. AAV9 preparation was carried out as previously described<sup>3</sup>. Non-anesthetized 8-week old ATF6<sup>fl/fl</sup> mice were injected with 100  $\mu$ L of AAV9-control or AAV9-cTnT-Cre containing  $1 \times 10^{11}$  viral particles via the lateral tail vein using a 27-gauge syringe and housed for 2 weeks before either sacrifice or experimental initiation. To generate AAV9-FLAG-Rheb, a plasmid encoding FLAG-Rheb was obtained from Addgene (Addgene 19996). The region of this construct containing FLAG-Rheb was excised with EcoR1 and Xho1, then, after addition of an EcoR1/Nhe1 linker, it was ligated into the Nhe1 and Xho1 sites of the AAV shuttle vector, pTRUF-CMVenhMLC800. AAV9 were then prepared and administered as previously described in accordance with the respective experimental paradigms<sup>3</sup>.

## Chromatin immunoprecipitation (ChIP)

ChIP assays were performed essentially as previously described<sup>3,12</sup>. Briefly, AdV-Con, AdV-FLAG-ATF6(1-373), or AdV-FLAG-ATF6(1-670) infected NRVM were treated with fixing buffer (50 mM HEPES-KOH, pH 7.5, 100 mM NaCl, 1 mM EDTA, 0.5 mM EGTA, and 1% formaldehyde) for 10 min, quenched with 125 mM glycine, and scraped into ice-cold PBS. Cells were centrifuged, resuspended in lysis buffer (50 mM HEPES, pH 7.9, 140 mM NaCl, 1 mM EDTA, 10% glycerol, 0.5% NP-40, 0.25% Triton X-100, and protease inhibitor cocktail), and incubated on ice for 10 min. After centrifugation at 1,800 x g for 10 min, the pellets were



washed with buffer containing 10 mM Tris, pH 8.1, 200 mM NaCl, 1 mM EDTA, and 0.5 mM EGTA, resuspended in shearing buffer (0.1% SDS, 1 mM EDTA, and 10 mM Tris, pH 8.1), and then transferred to microTUBEs (Covaris, Woburn, MA). Chromatin was sheared by sonication for 15 min using an M220 focused ultrasonicator (Covaris). Triton X-100 and NaCl were added to the final concentration of 1% Triton and 150 mM NaCl followed by centrifugation at 16,000 x g for 10 min. Immunoprecipitation was performed by incubated 140  $\mu$ l of sheared chromatin with 5  $\mu$ g of anti-FLAG antibody (cat# F1804, Sigma-Aldrich) and 260  $\mu$ l of immunoprecipitation buffer (0.1% SDS, 1 mM EDTA, 10 mM Tris, pH 8.1, 1% Triton X-100, and 150 mM NaCl) at 4°C overnight. Protein A/G magnetic beads (5  $\mu$ l, BcMag, Bioclone, San Diego, CA) were added to the mixtures and incubated at 4°C for 1.5 h. Magnetic beads were sequentially washed with low salt wash buffer (0.1% SDS, 1% Triton X-100, 2 mM EDTA, 20 mM HEPES-KOH, pH7.9, and 150 mM NaCl), high salt wash buffer with 500 mM NaCl, LiCl wash buffer (100 mM Tris-HCl, pH 7.5, 0.5 M LiCl, 1% NP-40, and 1% deoxycholate acid), and TE buffer (10 mM Tris-HCl, pH 8.0 and 0.1 mM EDTA). Immune complexes were eluted by incubating beads with proteinase K digestion buffer (20 mM HEPES, pH 7.9, 1 mM EDTA, 0.5% SDS, and 0.4 mg/ml proteinase K) at 50°C for 15 min. Formaldehyde crosslinking was reversed by incubating with 0.3 M NaCl and 0.3 mg/ml RNase A at 65°C overnight. Samples were further incubated with 550  $\mu$ g/ml proteinase K at 50°C for 1h. DNA was purified using NucleoSpin Gel and PCR Clean-up Kit (Macherey-Nagel, Bethlehem, PA) and eluted by 30  $\mu$ l of water. Two  $\mu$ l of DNA was used for qRT-PCR analysis with primers targeting rat Rheb ERSE-1 (5'-CTGCACAGATTCCATTCTTCCC-3' and 5'-TGTCTATACTTTAAATT-3'), rat Rheb ERSE-2 (5'-TGACAGCCAACCTACAGCC-3' and 5'-GAAGCGCGGTCATTGGTG-3'), rat Hspa5 (5'-GGTGGCATGAACCAACCAG-3' and 5'-GCTTATATATCCTCCCCGC-3'), rat Cat (5'-CTACCCACCAATTAGTACCAAATAA-3' and 5'-AGAAGGGACAGGATTGGAAG-3'), rat Pdia6 ERSE (5'-CACATGAGCGAAATCCACAGA-3' and 5'-ACTAGTCGAGCCATGCTGAT-3'), rat HO-1 (5'-GGGCTACTCCCGTCTTCCTG-3' and 5'-CCTTTCCAGAACCCTCTACTCTACTC-3'), or rat Gapdh (5'-ATGCGGTTTCTAGGTTTACAG-3' and 5'-ATGTTTTTCTGGGGTGCAAAG-3'). Pdia6 served as a positive control for a known ATF6 target gene in cardiac myocytes while HO-1 and Gapdh served as negative controls. ChIP signals obtained from the qRT-PCR were normalized to the input DNA.

### **<sup>3</sup>H-Leucine incorporation and trichloroacetic acid precipitation of protein**

NRVM <sup>3</sup>H-Leucine incorporation was performed as previously described<sup>7</sup>. Briefly, NRVM were plated at a density of 2.5 x 10<sup>5</sup> cells/well on 12-well plastic culture plates. After 48 hours of serum starvation in DMEM/F-12, NRVM culture media was replaced with DMEM/F12 supplemented with BSA (1 mg/ml) containing either control, phenylephrine (50  $\mu$ M), IGF1 (100ng/ml), or Lonafarnib

(2  $\mu$ M) for an additional 48 hours. To this media was added 1  $\mu$ Ci of  $^3\text{H}$ -Leucine (PerkinElmer NET460A001MC L-[3,4,5- $^3\text{H}$ (N)]-Leucine, 100 to 150 Ci/mmol). After 48 hours, the media was removed, cultures were washed 3 times with 1 ml DMEM/F-12 and cells were subsequently scraped from culture dishes with 0.5 ml of 25% trichloroacetic acid and transferred to 1.5 ml microcentrifuge tubes. Protein precipitation was induced using 50  $\mu$ l of a 10mg/ml solution of BSA and samples were allowed to freeze overnight. Upon thawing, precipitates were collected by centrifugation at 4°C at  $\sim$ 20,000xg for 20 minutes. Supernatants were removed by manual aspiration and precipitated protein dissolved in 200  $\mu$ l of base buffer (1% Triton X-100, 1M NaOH) at 37°C for two hours. Radioactivity in solubilized material was quantified by scintillation counting in glass scintillation vials using 180  $\mu$ l of solubilized protein into 10 ml of Ecoscint scintillation fluid. Each vial was counted for a minimum of 2 minutes with at least six separate myocyte cultures per treatment.

### **Cultured cardiac myocyte area**

NRVM (minimum of n=3 cultures per treatment) were visualized by phase-contrast microscopy and images were obtained with an IX70 fluorescence microscope (Olympus, Melville, NY) as previously described<sup>7</sup>. Cell surface area was determined using NIH Image J software from a minimum of 100 cells per image using three separate fields from each cell culture.

### **Transverse aortic constriction**

Transverse aortic constriction (TAC) was performed as previously described<sup>7</sup>. Briefly, adult male mice were anesthetized using a 2% isoflurane/O<sub>2</sub> mixture and intubated. Mice were treated with buprenorphine (0.1 mg/kg IP) and a partial trans-sternal thoracotomy performed using aseptic technique. An approximately 1.5 cm vertical left parasternal skin incision was made, underlying pectoralis muscle retracted, and the chest cavity entered through the fourth intercostal space. Using hooked retractors, adjacent ribs were retracted to expose the heart and aortic arch. The aorta was isolated from annexed tissue, and the artery partially ligated between the innominate and left common carotid arteries with 6-0 silk. The calibrated constriction of the aorta was performed by placing a dull 27-gauge needle to the side of the artery, the ligature tied firmly to both the needle and the artery, and, subsequently, the needle was removed leaving a calibrated stenosis of the aorta. Sham operated mice were exposed to the same procedure, except that the aorta was not constricted. The thoracic cavity was closed and the animals were allowed to recover. Animals were injected once with buprenorphine (0.1 mg/kg IP) about 12 h after recovery in order to reduce any post-operative discomfort. In case any animals displayed signs of pain or distress after this period, additional doses of buprenorphine were administered as needed. Immediately prior to sacrifice, animals were anesthetized and



constriction levels were quantified by measuring alterations in Doppler velocities of the innominate and left carotid arteries 7 days post-TAC, as previously described<sup>13</sup>. Mean carotid peak blood flow velocities were determined using a 20 MHz Doppler probe (Indus Instruments, Houston, TX) and ratios of innominate (RC) to left carotid (LC) were determined to evaluate consistency across animals in both SHAM and TAC groups. Just prior to sacrifice, post-TAC, animals were anesthetized and 0.5 mL of arterial blood were obtained via inferior vena cava puncture. Blood was placed in heparin- and EDTA-coated vacutainer (BD Vacutainer) and centrifuged at 3000 rpm for 10 minutes and plasma samples were analyzed for cardiac troponin I with a Mouse cTnI High-Sensitivity ELISA kit (Life Diagnostics, Inc.). A calcineurin phosphatase activity assay was performed using a calcineurin tissue extract assay kit (cat#BML-AK816-0001, Enzo Life Sciences) according to the manufacturer's protocol. Briefly, free phosphate was removed from LV tissue extracts by passing through a desalting column and calcineurin phosphatase activity was measured spectrophotometrically by detecting free phosphate released from the synthetic RII phosphopeptide.

### **Free-wheel exercise protocol**

Free-wheel exercise protocol was performed as previously described<sup>14</sup>. Briefly, adult male mice were housed individually in cages containing rodent exercise wheels of a 5.356 in diameter (Model InnoWheel, BioServe) and provided with food and water *ad libitum*. The wheels were equipped with a digital magnetic counter to record revolutions of the wheel during bouts of exercise. Sedentary mice were maximally housed and provided with food and water *ad libitum* in cages not equipped with exercise wheels.

### **Transthoracic echocardiography**

Transthoracic echocardiography was performed using an ultrasound imaging system (Vevo 2100 System, Fujifilm VisualSonics, Toronto, Ontario, Canada) as described<sup>3</sup>.

### **Transcript profiling and bioinformatics**

ATF6 TG and non-transgenic littermates were treated with tamoxifen (10 mg/kg IP) daily for 5 days as previously described<sup>2</sup>. Total RNA was isolated from mouse left ventricular extracts and RNA sequencing was carried out on Illumina Nextseq at CellNetworks Deep Sequencing Core Facility at Heidelberg University. Sequencing adapter residues and low quality bases were removed from raw sequencing reads prior to all other analysis steps using Flexbar version 3.0.3<sup>15</sup>. Subsequently, reads mapping to known ribosomal RNA species were excluded from further analyses using Bowtie2 version 2.3.0 with a custom rRNA-

index and only keeping non-aligning reads<sup>16</sup>. Principal read mapping against the mouse reference genome (mm10, ENSEMBL build 85) was performed with the STAR aligner, version 2.5.3a<sup>17</sup>. The read-to-transcript assignment was carried out using the R package Rsubread version 1.24.2<sup>18</sup> and the ENSEMBL gene annotation mm10/build85. The resulting count table was further processed with the edgeR R package<sup>19</sup> to construct the list of differentially expressed genes. The final heatmap was generated using the pheatmap R package version 1.0.10<sup>20</sup>.

## Statistics

For studies involving surgical TAC, cohort sizes were based on a predictive power analysis to achieve 5% error and 80% power using G\*Power 3.1.9.3. Cell culture experiments were performed with at least three cultures for each treatment. Shapiro-Wilk tests were performed to assess the nature of all data, which were shown to exhibit a Gaussian distribution. Accordingly, two-group comparisons were performed using Student's two-tailed t-test, and all multiple group comparisons were performed using a one-way ANOVA with a Newman-Keuls *post-hoc* analysis. All analyses were performed using Prism 7.0e. mRNA and protein expression levels were normalized to either glyceraldehyde 3-phosphate dehydrogenase (GAPDH) or  $\beta$ -Actin. Where appropriate, a linear transformation was performed to set the result of control group (usually Con Sham) to 1, by dividing each group with the average obtained for their control group. Data are represented as mean with all error bars indicating  $\pm$  SEM. \* $P < 0.05$ , \*\* $P < 0.01$ , # $P < 0.001$ .

## REFERENCES:

1. Engin F, Yermalovich A, Nguyen T, Hummasti S, Fu W, Eizirik DL, Mathis D and Hotamisligil GS. Restoration of the unfolded protein response in pancreatic beta cells protects mice against type 1 diabetes. *Sci Transl Med.* 2013;5:211ra156.
2. Martindale JJ, Fernandez R, Thuerauf D, Whittaker R, Gude N, Sussman MA and Glembotski CC. Endoplasmic reticulum stress gene induction and protection from ischemia/reperfusion injury in the hearts of transgenic mice with a tamoxifen-regulated form of ATF6. *Circ Res.* 2006;98:1186-93.
3. Jin JK, Blackwood EA, Azizi K, Thuerauf DJ, Fahem AG, Hofmann C, Kaufman RJ, Doroudgar S and Glembotski CC. ATF6 Decreases Myocardial Ischemia/Reperfusion Damage and Links ER Stress and Oxidative Stress Signaling Pathways in the Heart. *Circ Res.* 2017;120:862-875.
4. Niessner H, Beck D, Sinnberg T, Lasithiotakis K, Maczey E, Gogel J, Venturelli S, Berger A, Mauthe M, Toulany M, Flaherty K, Schaller M, Schadendorf D, Proikas-Cezanne T, Schitteck B, Garbe C, Kulms D and Meier

- F. The farnesyl transferase inhibitor lonafarnib inhibits mTOR signaling and enforces sorafenib-induced apoptosis in melanoma cells. *J Invest Dermatol.* 2011;131:468-79.
5. Volkens M, Toko H, Doroudgar S, Din S, Quijada P, Joyo AY, Ornelas L, Joyo E, Thuerlauf DJ, Konstandin MH, Gude N, Glembotski CC and Sussman MA. Pathological hypertrophy amelioration by PRAS40-mediated inhibition of mTORC1. *Proc Natl Acad Sci U S A.* 2013;110:12661-6.
  6. Park CS, Cha H, Kwon EJ, Sreenivasaiah PK and Kim DH. The chemical chaperone 4-phenylbutyric acid attenuates pressure-overload cardiac hypertrophy by alleviating endoplasmic reticulum stress. *Biochem Biophys Res Commun.* 2012;421:578-84.
  7. Doroudgar S, Volkens M, Thuerlauf DJ, Khan M, Mohsin S, Respress JL, Wang W, Gude N, Muller OJ, Wehrens XH, Sussman MA and Glembotski CC. Hrd1 and ER-Associated Protein Degradation, ERAD, are Critical Elements of the Adaptive ER Stress Response in Cardiac Myocytes. *Circ Res.* 2015;117:536-46.
  8. Thuerlauf DJ, Hoover H, Meller J, Hernandez J, Su L, Andrews C, Dillmann WH, McDonough PM and Glembotski CC. Sarco/endoplasmic reticulum calcium ATPase-2 expression is regulated by ATF6 during the endoplasmic reticulum stress response: intracellular signaling of calcium stress in a cardiac myocyte model system. *J Biol Chem.* 2001;276:48309-17.
  9. Zechner D, Craig R, Hanford DS, McDonough PM, Sabbadini RA and Glembotski CC. MKK6 activates myocardial cell NF-kappa B and inhibits apoptosis in a p38 mitogen-activated protein kinase-dependent manner. *Journal of Biological Chemistry.* 1998;273:8232-8239.
  10. Doroudgar S, Thuerlauf DJ, Marcinko MC, Belmont PJ and Glembotski CC. Ischemia activates the ATF6 branch of the endoplasmic reticulum stress response. *J Biol Chem.* 2009;284:29735-45.
  11. Thuerlauf DJ, Hoover H, Meller J, Hernandez J, Su L, Andrews C, Dillmann WH, McDonough PM and Glembotski CC. Sarco/endoplasmic reticulum calcium ATPase-2 expression is regulated by ATF6 during the endoplasmic reticulum stress response - Intracellular signaling of calcium stress in a cardiac myocyte model system. *Journal of Biological Chemistry.* 2001;276:48309-48317.
  12. Vekich JA, Belmont PJ, Thuerlauf DJ and Glembotski CC. Protein disulfide isomerase-associated 6 is an ATF6-inducible ER stress response protein that protects cardiac myocytes from ischemia/reperfusion-mediated cell death. *J Mol Cell Cardiol.* 2012;53:259-67.
  13. Reynolds JO, Quick AP, Wang Q, Beavers DL, Philippen LE, Showell J, Barreto-Torres G, Thuerlauf DJ, Doroudgar S, Glembotski CC and Wehrens XH. Junctophilin-2 gene therapy rescues heart failure by normalizing RyR2-mediated Ca<sup>2+</sup> release. *Int J Cardiol.* 2016;225:371-380.
  14. Volkens M, Toko H, Doroudgar S, Din S, Quijada P, Joyo AY, Ornelas L, Joyo E, Thuerlauf DJ, Konstandin MH, Gude N, Glembotski CC and Sussman MA. Pathological hypertrophy amelioration by PRAS40-mediated inhibition of mTORC1. *Proc Natl Acad Sci U S A.* 110:12661-6.

15. Roehr JT, Dieterich C and Reinert K. Flexbar 3.0 - SIMD and multicore parallelization. *Bioinformatics*. 2017;33:2941-2942.
16. Langmead B and Salzberg SL. Fast gapped-read alignment with Bowtie 2. *Nat Methods*. 2012;9:357-9.
17. Dobin A, Davis CA, Schlesinger F, Drenkow J, Zaleski C, Jha S, Batut P, Chaisson M and Gingeras TR. STAR: ultrafast universal RNA-seq aligner. *Bioinformatics*. 2013;29:15-21.
18. Liao Y, Smyth GK and Shi W. The Subread aligner: fast, accurate and scalable read mapping by seed-and-vote. *Nucleic Acids Res*. 2013;41:e108.
19. Robinson MD, McCarthy DJ and Smyth GK. edgeR: a Bioconductor package for differential expression analysis of digital gene expression data. *Bioinformatics*. 2010;26:139-40.
20. Kolde R. Pheatmap: pretty heatmaps. R Packag. version 61. 2012.

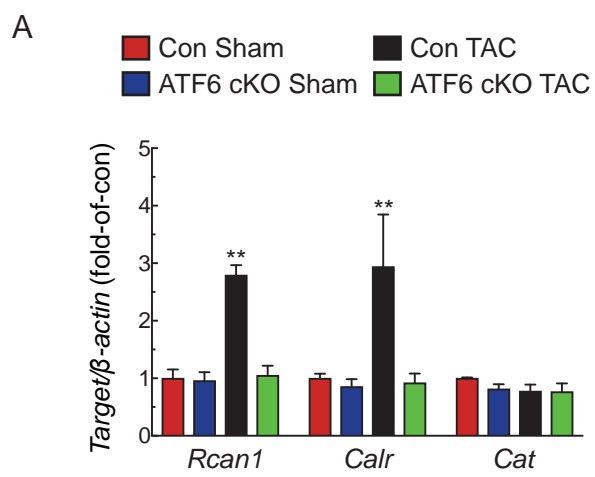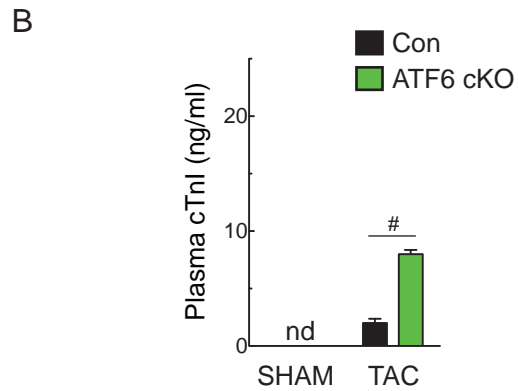

**Online Figure I. Effect of cardiac myocyte-specific ATF6 gene deletion in mice subjected to TAC: A**, mRNA for ATF6 target genes was determined by qRT-PCR. **B**, Troponin I (cTnl) levels were measured in plasma samples collected from Con or ATF6 cKO mice. Data are represented as mean  $\pm$  s.e.m. \*\* $P \leq 0.01$ , # $P \leq 0.001$ .



A GO:0007264: small GTPase mediated signal transduction

|          |          |           |          |         |        |       |
|----------|----------|-----------|----------|---------|--------|-------|
| Rhoq     | Arf2     | Rheb      | Tiam2    | Rap1a   | Pak4   | Rap2b |
| Arhgap44 | Rala     | Mapkap1   | Nckap1   | Rhod    | Farp1  | Pak3  |
| Ctnnal1  | Arhgap12 | Rhoa      | Arhgap35 | Arhgdia | Jun    | Rnd1  |
| Ralgs1   | Map2k1   | Arhgef10l | Spata13  | Hras    | Rap2a  | Gpr35 |
| Kras     | Kpnb1    | Rnd3      | Shoc2    | Git1    | Kank1  | Pdpn  |
| Erb2     | Rhoc     | Stmn1     | Aif1     | Sdcbp   | Rras2  | Dok2  |
| Ralb     | Hmox1    | Net1      | Cdc42    | Itga3   | Col3a1 | Ect2  |
| Arhgap1  | Bcl6     |           |          |         |        |       |

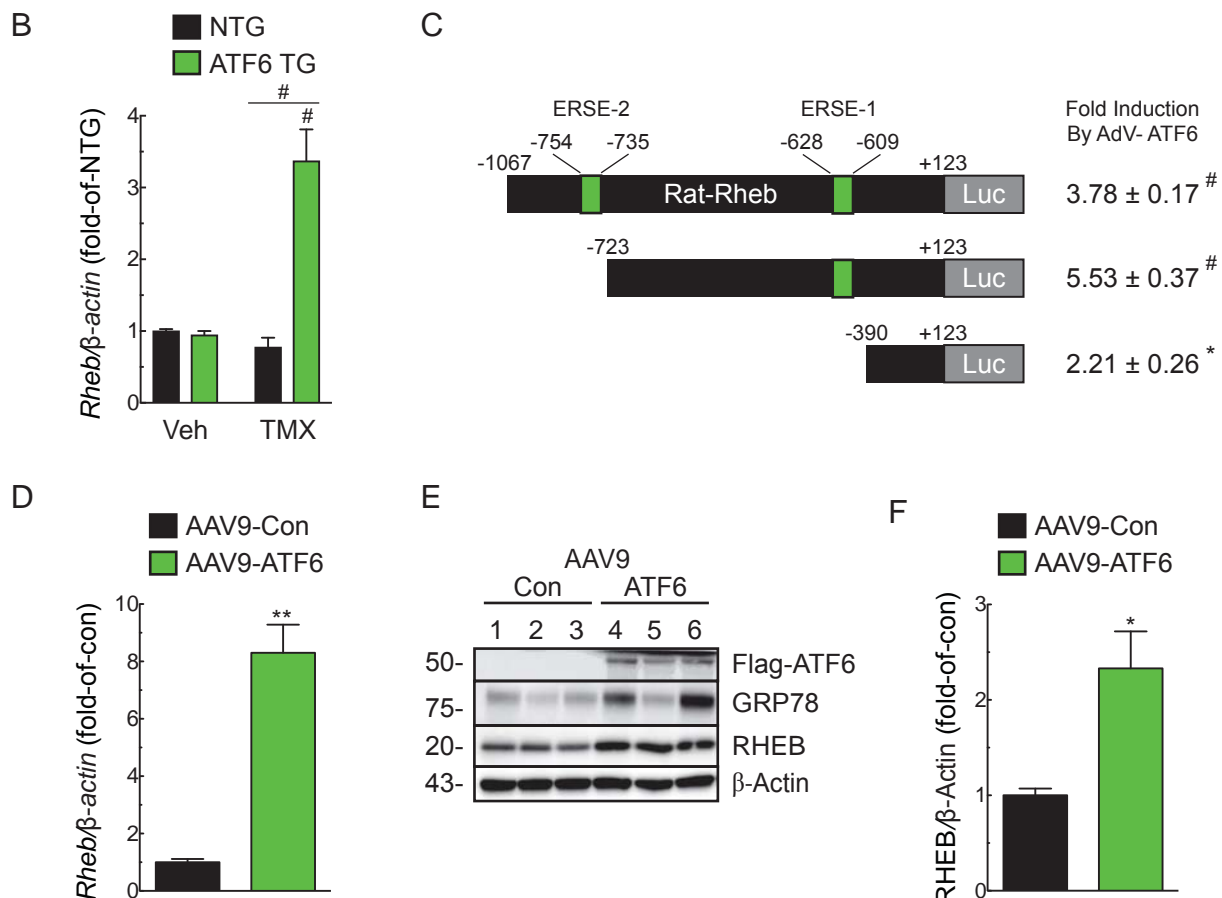

**Online Figure II. ATF6-dependent induction of Rheb in mouse hearts: A**, Table of a subset of induced genes represented by respective gene symbols in ATF6 TG mice with p values and FDR <0.05 annotated with ensemble biological process term GO:0007264.

**B**, mRNA for Rheb was determined by qRT-PCR using LV extracts from ATF6-transgenic (ATF6 TG) and non-transgenic littermates after 5 days of tamoxifen administration (10mg/kg), which activates ATF6 in this mouse line.

**C**, Diagram of constructs encoding different truncated forms of the rat rheb 5'-flanking sequence driving luciferase, as shown (left), i.e. rat-rheb(-1067/+123)-Luc, rat-rheb(-723/+123)-Luc, and rat-rheb(-390/+123)-Luc were transfected into NRVM which were then infected with AdV encoding ATF6(1-373) [active form], or with a control AdV. Luciferase enzyme activity in AdV-ATF6-infected cells was normalized to luciferase enzyme activity in AdV-Con-infected cells to determine the fold-induction by ATF6 (right).

**D**, mRNA for Rheb was determined by qRT-PCR from LV extracts from mice treated 4 weeks with AAV9-Con or AAV9-ATF6.

**E, F**, Immunoblot (**E**) and densitometry quantification (**F**) of RHEB protein expression AAV9-Con or AAV9-ATF6 mouse heart extracts.

Data are represented as mean ± s.e.m. \*P ≤ 0.05, \*\*P ≤ 0.01, #P ≤ 0.001.

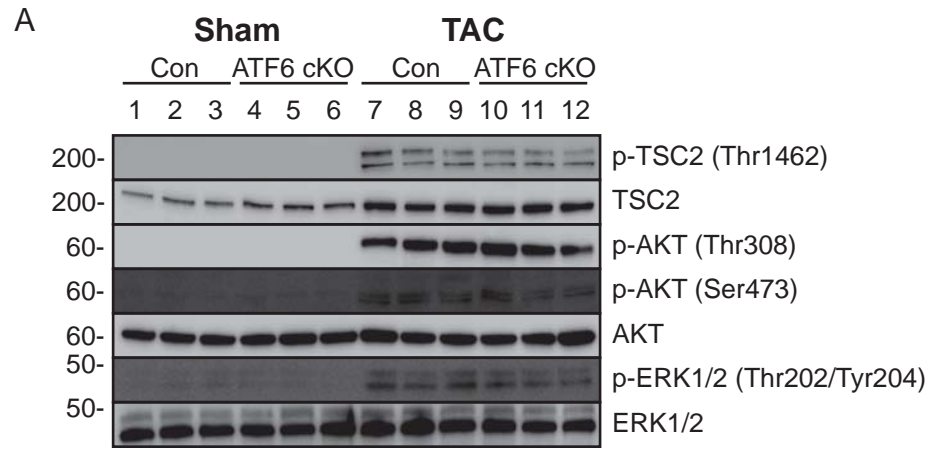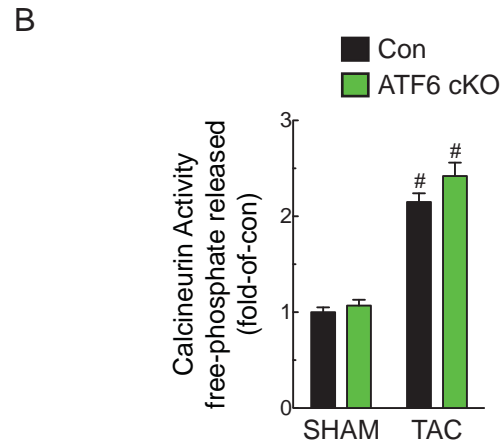

**Online Figure III. Effects of ATF6 deletion on regulators of the mTORC1 pathway in hearts of mice subjected to TAC: A,** Immunoblot of TSC2, AKT, and ERK1/2 protein phosphorylation and expression in LV extracts from Con or ATF6 cKO mice after 7 days of Sham or TAC. **B,** Calcineurin activity as measured by free-phosphate release in LV extracts from Con or ATF6 cKO mice after 7 days of Sham or TAC. Data are represented as mean $\pm$ s.e.m. # $P\leq 0.001$ .

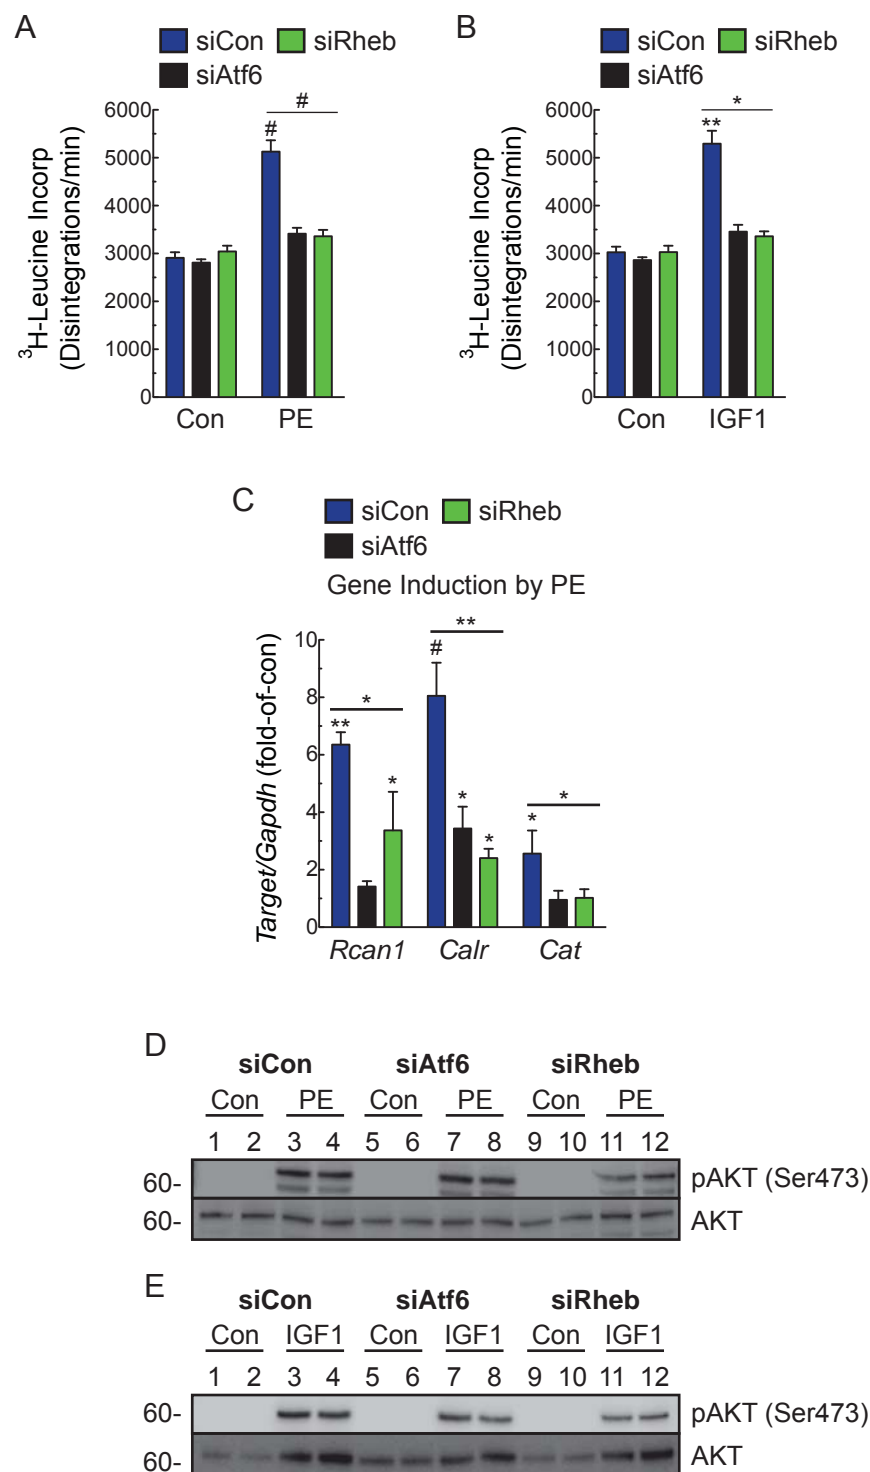

**Online Figure IV. Effect of ATF6 and RHEB knockdown on the mTORC1 pathway at cardiac myocyte hypertrophy: A-E**, NRVM were transfected with a nontargeted siRNA (siCon) or siRNAs targeted to rat ATF6 (siAtf6) or RHEB (siRheb), and then treated with or without phenylephrine (PE; 50 $\mu$ M) or IGF1 (100ng/ml) for 48 hours. **A, B**, Incorporation of <sup>3</sup>H-leucine into TCA-precipitable protein in NRVM extracts was measured by scintillation counting. **E**, mRNA for ATF6 target genes was determined by qRT-PCR in coordination with target genes presented in Figure 4E. **D, E**, Immunoblot of NRVM. Phosphorylation of AKT on Ser473 is indicative of mTORC2 activity. Data are represented as mean  $\pm$  s.e.m. \*P $\leq$ 0.05, \*\*P $\leq$ 0.01, #P $\leq$ 0.001.

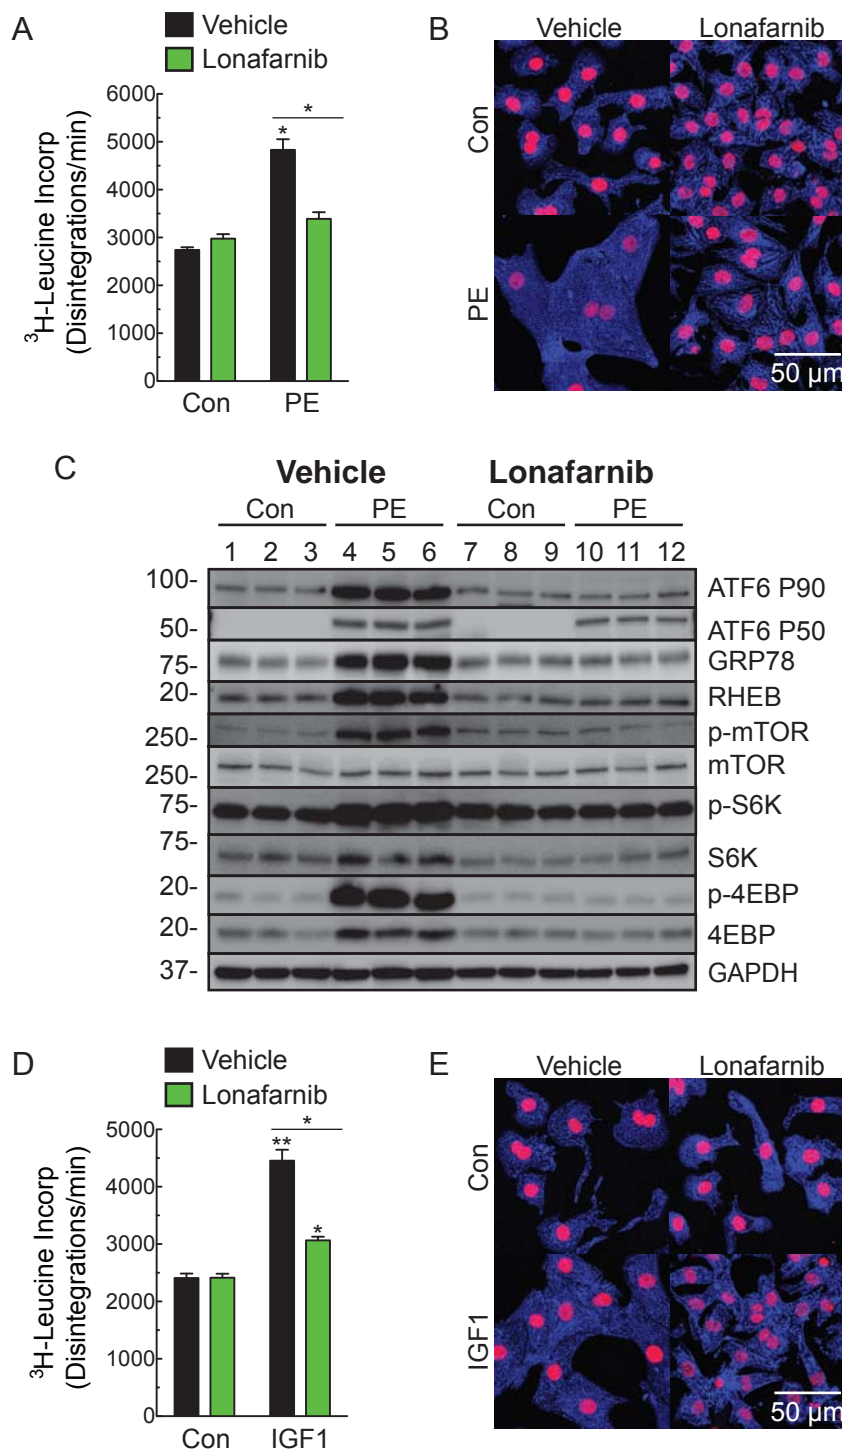

**Online Figure V. Rheb-inhibitor, Lonafarnib, inhibition of cardiac myocyte hypertrophy:** **A-C**, NRVM were treated with or without PE (50 $\mu$ M) for 48 hours in the presence or absence of the Rheb inhibitor, Lonafarnib (2 $\mu$ M). **A**, Incorporation of  $^3$ H-leucine into TCA-precipitable protein in NRVM extracts was measured by scintillation counting. **B**, ICF of NRVM stained for  $\alpha$ -actinin (blue) and TOPRO-3 (red). Bar = 50 $\mu$ m. **C**, Immunoblot of NRVM. **D-E**, NRVM were treated with or without IGF1 (100ng/ml) for 48 hours in the presence or absence of the Rheb inhibitor, Lonafarnib (2 $\mu$ M). **D**, Incorporation of  $^3$ H-leucine into TCA-precipitable protein in NRVM extracts was measured by scintillation counting. **E**, ICF of NRVM stained for  $\alpha$ -actinin (blue) and TOPRO-3 (red). Bar = 50 $\mu$ m. Data are represented as mean  $\pm$  s.e.m. \* $P \leq 0.05$ , \*\* $P \leq 0.01$ .

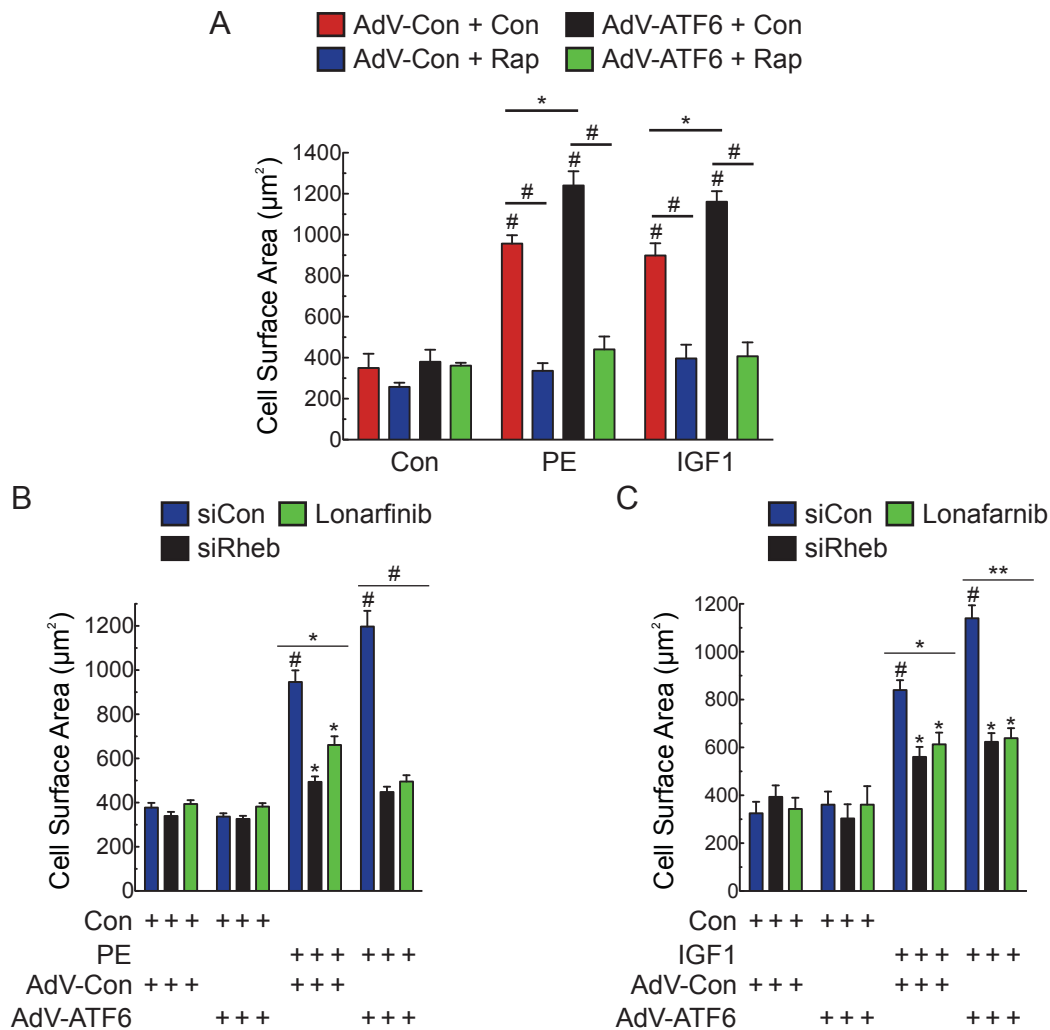

**Online Figure VI. Effect of ATF6 overexpression on cardiac myocyte hypertrophy:**

**A**, NRVM were infected with AdV encoding control or FLAG-ATF6(1-373) [active form] and then treated with or without phenylephrine (PE; 50µM) or IGF1 (100ng/ml), with or without rapamycin (20nM) for 48 hours, as shown. Cell surface area was determined by photomicroscopy and morphometry, then expressed as mean ± s.e.m after analyzing at least 100 cells per treatment per experiment. **B-C**, NRVM were transfected with a non-targeted siRNA (siCon) or siRNA targeted to rat RHEB (siRheb), and then infected with AdV encoding control or FLAG-ATF6(1-373) [active form]. NRVM were then treated with or without phenylephrine (PE; 50µM) (**B**) or IGF1 (100ng/ml) (**C**) with or without Lonarfinib (2µM) for 48 hours, as shown. Data are represented as mean ± s.e.m. \*P≤0.05, \*\*P≤0.01, #P≤0.001.



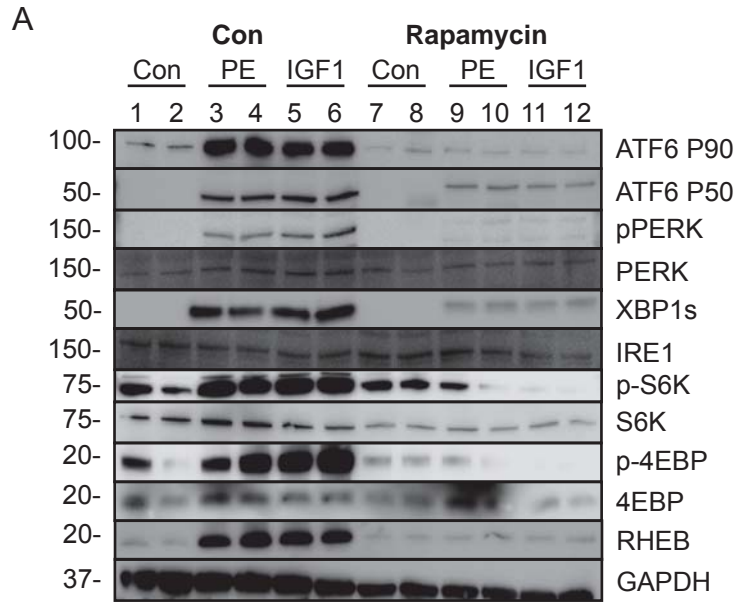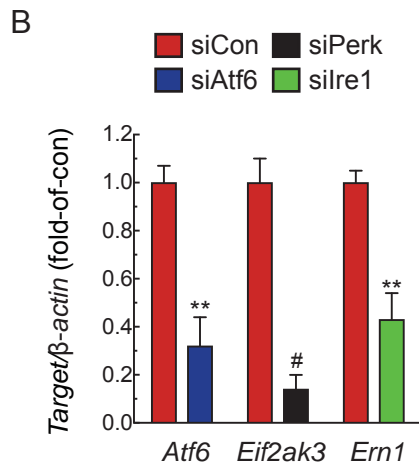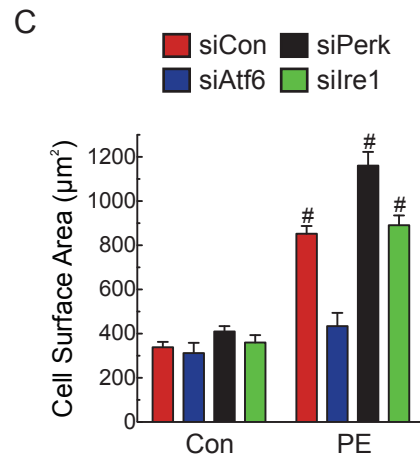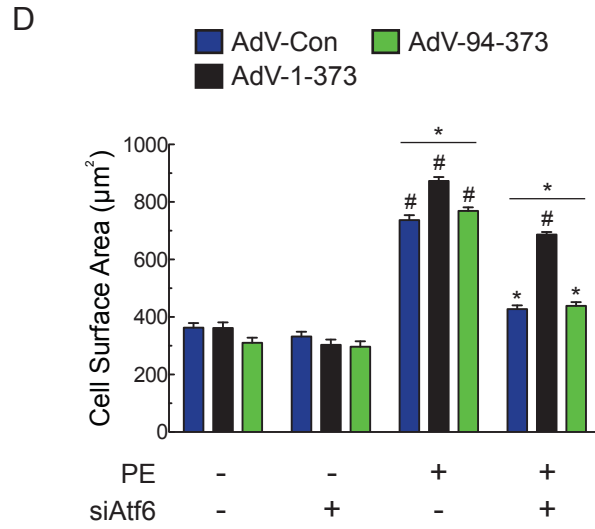

**Online Figure VII. mTORC1-dependent activation of the UPR during cardiac myocyte hypertrophy: A**, Immunoblot of NRVM after treatment with or without phenylephrine (PE; 50 $\mu$ M) or IGF1 (100ng/ml), with or without rapamycin (20nM) for 48 hours, as shown. **B, C**, NRVM were transfected with siCon or siRNAs targeted to rat ATF6 (siAtf6), PERK (siPerk), or IRE1 (silre1) and then treated with or without phenylephrine (PE; 50 $\mu$ M) for 48 hours. Atf6, Perk (Eif2ak3) and Ire1 (Ern1) mRNA levels were determined by qRT-PCR (**B**), and cell surface area was determined by photomicroscopy and morphometry (**C**). **D**, NRVM were transfected with a nontargeted siRNA (siCon) or siRNA targeted to rat ATF6 (siAtf6) and were then infected with AdV encoding control, FLAG-ATF6(1-373) [active] or FLAG-ATF6(94-373) [inactive due to deletion of transcriptional activation domain], then treated with or without phenylephrine (PE; 50 $\mu$ M) for 48 hours. Cell surface area was determined by photomicroscopy and morphometry, then expressed as mean $\pm$ s.e.m after analyzing at least 100 cells per treatment per experiment. Data are represented as mean $\pm$ s.e.m. \*P $\leq$ 0.05, \*\*P $\leq$ 0.05, #P $\leq$ 0.001.

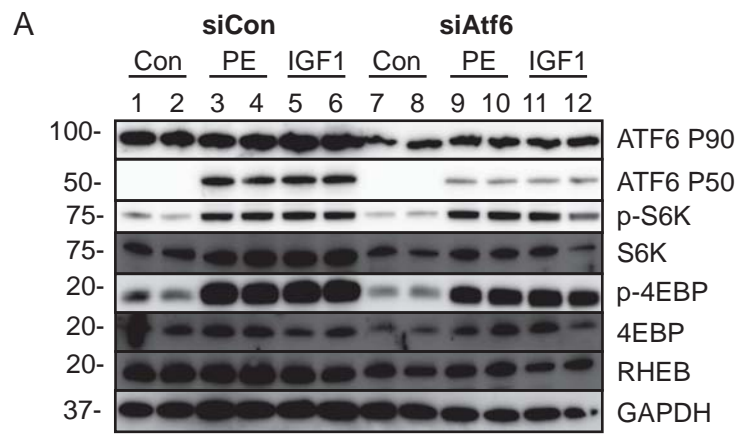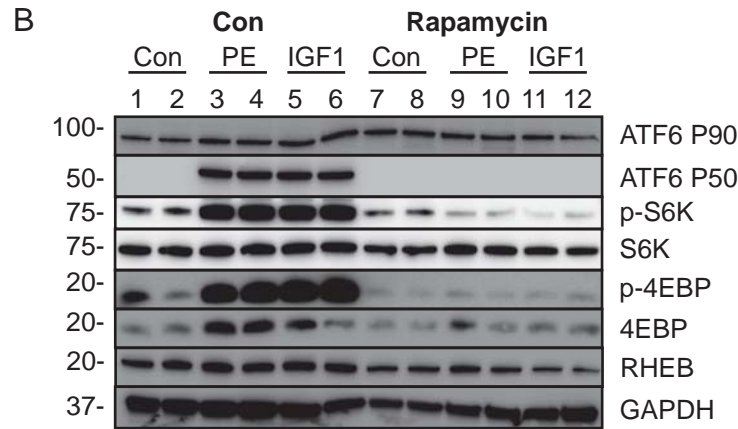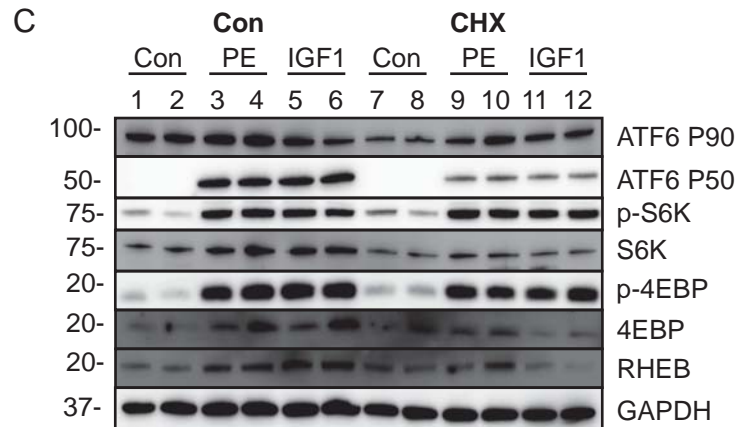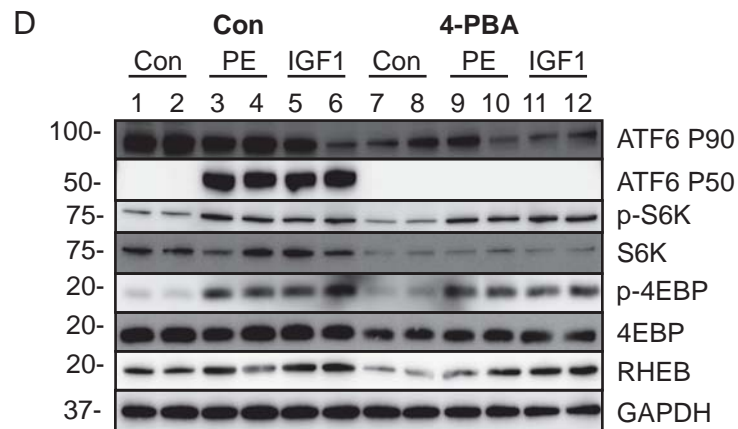

**Online Figure VIII. Protein synthesis-dependent activation of the UPR during cardiac myocyte hypertrophy:** **A**, Immunoblot of NRVM transfected with a nontargeted siRNA (siCon) or with siRNA targeted to rat ATF6 (siAtf6) and then treated with or without phenylephrine (PE; 50 $\mu$ M) or IGF1 (100ng/ml) for 6 hours. **B**, Immunoblot of NRVM after treatment with or without phenylephrine (PE; 50 $\mu$ M) or IGF1 (100ng/ml), with or without rapamycin (20nM) for 6 hours, as shown. **C**, Immunoblot of NRVM after co-treatment with or without cyclohexamide (CHX; 100 $\mu$ g/ml) and either phenylephrine (PE; 50 $\mu$ M) or IGF1 (100ng/ml) for 6 hours. **D**, Immunoblot of NRVM after pretreatment with 4-phenylbutyrate (4-PBA; 100 $\mu$ M) for 24 hours and subsequent co-treatment with or without 4-PBA (100 $\mu$ M) and either phenylephrine (PE; 50 $\mu$ M) or IGF1 (100ng/ml) for an additional 6 hours.

**Table I: 7-day TAC echocardiographic parameters for Con and ATF6 cKO mice**

|               | Con Sham<br>(n = 5) | ATF6 cKO Sham<br>(n = 5) | Con TAC<br>(n = 5)       | ATF6 cKO TAC<br>(n = 6)    |
|---------------|---------------------|--------------------------|--------------------------|----------------------------|
| FS (%)        | 30.40±1.91          | 26.71±2.31               | 28.28±1.89               | 16.12±1.41 <sup>1,2</sup>  |
| EF (%)        | 58.60±2.72          | 52.64±3.72               | 55.46±2.86               | 34.30±2.74 <sup>1,2</sup>  |
| LVEDV (μl)    | 53.75±5.29          | 62.55±4.99               | 51.26±2.23               | 68.32±5.21 <sup>2</sup>    |
| LVESV (μl)    | 22.47±3.07          | 30.08±3.98               | 22.83±1.80               | 45.35±4.73 <sup>2</sup>    |
| LVIDD (mm)    | 3.56±0.15           | 3.80±0.13                | 3.51±0.06                | 3.95±0.13 <sup>2</sup>     |
| LVIDS (mm)    | 2.48±0.14           | 2.80±0.16                | 2.52±0.08                | 3.32±0.15 <sup>1,2</sup>   |
| PWTD (mm)     | 0.86±0.13           | 0.89±0.15                | 1.51±0.11 <sup>1</sup>   | 1.01±0.10 <sup>2</sup>     |
| PWTS (mm)     | 1.17±0.10           | 1.04±0.12                | 1.76±0.10 <sup>1</sup>   | 1.07±0.11 <sup>2</sup>     |
| AWTD (mm)     | 0.88±0.07           | 0.76±0.05                | 1.40±0.08 <sup>1</sup>   | 0.97±0.07 <sup>1,2</sup>   |
| AWTS (mm)     | 1.08±0.04           | 1.02±0.08                | 1.72±0.03 <sup>1</sup>   | 1.10±0.07 <sup>2</sup>     |
| HR (bpm)      | 519±13.27           | 540±2.63                 | 524±3.71                 | 523±13.47                  |
| DPLR (RC/LC)  | 0.91±0.05           | 1.11±0.08                | 4.56±0.25 <sup>1</sup>   | 4.85±0.34 <sup>1</sup>     |
| HW (mg)       | 118.98±5.41         | 120.62±3.35              | 183.36±6.14 <sup>1</sup> | 154.08±3.09 <sup>1,2</sup> |
| BW (g)        | 21.57±0.78          | 23.85±0.80               | 25.78±0.64 <sup>1</sup>  | 24.43±0.59                 |
| TL (mm)       | 16.40±0.24          | 17.40±0.24               | 17.40±0.24               | 17.00±0.00                 |
| HW/BW (mg/g)  | 5.53±0.27           | 5.06±0.08                | 7.12±0.20 <sup>1</sup>   | 6.32±0.16 <sup>1,2</sup>   |
| HW/TL (mg/mm) | 7.26±0.33           | 6.93±0.11                | 10.53±0.25 <sup>1</sup>  | 9.06±0.18 <sup>1,2</sup>   |

FS = fractional shortening

EF = ejection fraction

LVEDV = left ventricular end diastolic volume

LVESV = left ventricular end systolic volume

LVIDD = left ventricular inner diameter in diastole

LVIDS = left ventricular inner diameter in systole

PWTD = left ventricular posterior wall thickness in diastole

PWTS = left ventricular posterior wall thickness in systole

AWTD = left ventricular anterior wall thickness in diastole

AWTS = left ventricular anterior wall thickness in systole

HR = heart rate in beats per minute

DPLR = Doppler ratio of right carotid blood flow velocity to left carotid blood flow velocity

HW = heart weight

BW = body weight

TL = tibia length

HW/BW = heart weight/body weight

HW/TL = heart weight/tibia length

Statistical analyses used a one-way ANOVA with a Newman-Keuls post-hoc analysis.

<sup>1</sup> =  $p \leq 0.05$  different from respective Sham

<sup>2</sup> =  $p \leq 0.05$  different from Con TAC



**Table II: 4-week Free Wheel echocardiographic parameters for Con and ATF6 cKO mice**

|               | Con<br>Sedentary<br>(n = 5) | ATF6 cKO<br>Sedentary<br>(n = 5) | Con<br>Run<br>(n = 5)    | ATF6 cKO<br>Run<br>(n = 5) |
|---------------|-----------------------------|----------------------------------|--------------------------|----------------------------|
| FS (%)        | 29.19±1.46                  | 24.22±1.64                       | 29.24±1.74               | 23.03±1.75 <sup>2</sup>    |
| EF (%)        | 56.42±2.33                  | 48.55±2.70                       | 57.06±2.74               | 46.53±3.00 <sup>2</sup>    |
| LVEDV (μl)    | 79.56±16.48                 | 72.38±6.33                       | 50.38±7.60               | 71.78±5.85 <sup>2</sup>    |
| LVESV (μl)    | 35.29±7.76                  | 37.64±4.35                       | 22.29±3.93               | 38.54±4.11 <sup>2</sup>    |
| LVIDD (mm)    | 4.13±0.40                   | 4.04±0.15                        | 3.44±0.24                | 4.03±0.14 <sup>2</sup>     |
| LVIDS (mm)    | 2.93±0.30                   | 3.07±0.16                        | 2.45±0.21                | 3.10±0.14 <sup>2</sup>     |
| PWTD (mm)     | 0.75±0.14                   | 0.89±0.14                        | 1.77±0.11 <sup>1</sup>   | 0.79±0.03 <sup>2</sup>     |
| PWTS (mm)     | 1.08±0.08                   | 1.21±0.15                        | 2.06±0.08 <sup>1</sup>   | 1.08±0.04 <sup>2</sup>     |
| AWTD (mm)     | 0.81±0.06                   | 0.84±0.07                        | 1.22±0.08 <sup>1</sup>   | 0.96±0.09 <sup>2</sup>     |
| AWTS (mm)     | 1.11±0.03                   | 1.14±0.05                        | 1.48±0.07 <sup>1</sup>   | 1.09±0.07 <sup>2</sup>     |
| HR (bpm)      | 491±9.28                    | 500±9.36                         | 506±9.11                 | 556±8.70 <sup>1,2</sup>    |
| DIST (km/wk)  | n/a                         | n/a                              | 8.11±1.79                | 8.65±0.87                  |
| HW (mg)       | 132.02±4.51                 | 128.32±7.28                      | 171.16±5.24 <sup>1</sup> | 137.02±1.40 <sup>2</sup>   |
| BW (g)        | 27.23±0.51                  | 25.14±0.90                       | 24.80±0.66 <sup>1</sup>  | 24.43±0.43                 |
| TL (mm)       | 17.00±0.00                  | 17.20±0.20                       | 17.20±0.20               | 17.60±0.24                 |
| HW/BW (mg/g)  | 4.85±0.14                   | 5.09±0.16                        | 6.90±0.13 <sup>1</sup>   | 5.61±0.09 <sup>1,2</sup>   |
| HW/TL (mg/mm) | 7.77±0.27                   | 7.46±0.42                        | 9.96±0.35 <sup>1</sup>   | 7.79±0.11 <sup>2</sup>     |

FS = fractional shortening

EF = ejection fraction

LVEDV = left ventricular end diastolic volume

LVESV = left ventricular end systolic volume

LVIDD = left ventricular inner diameter in diastole

LVIDS = left ventricular inner diameter in systole

PWTD = left ventricular posterior wall thickness in diastole

PWTS = left ventricular posterior wall thickness in systole

AWTD = left ventricular anterior wall thickness in diastole

AWTS = left ventricular anterior wall thickness in systole

HR = heart rate in beats per minute

DIST = average distance ran per week

HW = heart weight

BW = body weight

TL = tibia length

HW/BW = heart weight/body weight

HW/TL = heart weight/tibia length

Statistical analyses used a one-way ANOVA with a Newman-Keuls post-hoc analysis.

<sup>1</sup> =  $p \leq 0.05$  different from respective Sedentary

<sup>2</sup> =  $p \leq 0.05$  different from Con Run

**Online Table III - Genes Changed by ATF6 in the Heart**

|          |             | p < 0.05           |                     |
|----------|-------------|--------------------|---------------------|
| Gene No. | Gene Symbol | ENSEMBL ID         | log <sub>2</sub> FC |
| 1        | Derl3       | ENSMUSG00000009092 | 11.81357136         |
| 2        | Bmp10       | ENSMUSG00000030046 | 10.08553123         |
| 3        | Serpib1c    | ENSMUSG00000079049 | 9.474748328         |
| 4        | Esr1        | ENSMUSG00000019768 | 9.008620439         |
| 5        | Saa3        | ENSMUSG00000040026 | 8.404639259         |
| 6        | Rec8        | ENSMUSG00000002324 | 7.080680613         |
| 7        | Gm8424      | ENSMUSG00000081194 | 6.43393998          |
| 8        | Sdf2l1      | ENSMUSG00000022769 | 6.422401383         |
| 9        | Vmn2r3      | ENSMUSG00000091572 | 6.388726375         |
| 10       | Gm1627      | ENSMUSG00000100987 | 6.167009426         |
| 11       | Slc7a11     | ENSMUSG00000027737 | 6.022939919         |
| 12       | Epyc        | ENSMUSG00000019936 | 5.970480515         |
| 13       | Far1        | ENSMUSG00000030759 | 5.898776763         |
| 14       | Myl7        | ENSMUSG00000020469 | 5.765310795         |
| 15       | Ube2c       | ENSMUSG00000001403 | 5.703447206         |
| 16       | Arntl       | ENSMUSG00000055116 | 5.68993575          |
| 17       | Pdia4       | ENSMUSG00000025823 | 5.653529589         |
| 18       | Mthfd2      | ENSMUSG00000005667 | 5.640699455         |
| 19       | Slc6a2      | ENSMUSG00000055368 | 5.588147698         |
| 20       | Slc7a3      | ENSMUSG00000031297 | 5.585746991         |
| 21       | Pak3        | ENSMUSG00000031284 | 5.576617158         |
| 22       | Chil3       | ENSMUSG00000040809 | 5.544097671         |
| 23       | Mybphl      | ENSMUSG00000068745 | 5.418282086         |
| 24       | Pycr1       | ENSMUSG00000025140 | 5.415421318         |
| 25       | Mefv        | ENSMUSG00000022534 | 5.273792403         |
| 26       | Psat1       | ENSMUSG00000024640 | 5.200998995         |
| 27       | Serpina3f   | ENSMUSG00000066363 | 5.179387737         |
| 28       | Baalc       | ENSMUSG00000022296 | 5.165927848         |
| 29       | Myl4        | ENSMUSG00000061086 | 5.142184528         |
| 30       | Sln         | ENSMUSG00000042045 | 5.062686483         |
| 31       | Ptx3        | ENSMUSG00000027832 | 5.060941359         |
| 32       | Prkcz       | ENSMUSG00000029053 | 5.04750561          |
| 33       | Gm33474     | ENSMUSG00000106554 | 4.984196961         |
| 34       | Acox2       | ENSMUSG00000021751 | 4.824390864         |
| 35       | Phgdh       | ENSMUSG00000053398 | 4.816582392         |
| 36       | Ptprt       | ENSMUSG00000053141 | 4.730415496         |
| 37       | Manf        | ENSMUSG00000032575 | 4.726713953         |
| 38       | Asns        | ENSMUSG00000029752 | 4.620079425         |
| 39       | Gm11382     | ENSMUSG00000074973 | 4.614035415         |
| 40       | Polr3k      | ENSMUSG00000038628 | 4.549235916         |
| 41       | Tnni1       | ENSMUSG00000026418 | 4.526836544         |
| 42       | Cxcl5       | ENSMUSG00000029371 | 4.443899107         |
| 43       | Tubb3       | ENSMUSG00000062380 | 4.421978788         |

|    |               |                     |             |
|----|---------------|---------------------|-------------|
| 44 | Tk1           | ENSMUSG00000025574  | 4.417099686 |
| 45 | Mlana         | ENSMUSG00000024806  | 4.402834241 |
| 46 | Ccl2          | ENSMUSG00000035385  | 4.389626965 |
| 47 | Selp          | ENSMUSG00000026580  | 4.375541912 |
| 48 | P4hb          | ENSMUSG00000025130  | 4.375151476 |
| 49 | Gabrg3        | ENSMUSG00000055026  | 4.295137994 |
| 50 | Mcoln2        | ENSMUSG00000011008  | 4.238921524 |
| 51 | Timp1         | ENSMUSG00000001131  | 4.214956842 |
| 52 | 7530428D23Rik | ENSMUSG000000103441 | 4.200585247 |
| 53 | Mmp12         | ENSMUSG00000049723  | 4.177679228 |
| 54 | Sphkap        | ENSMUSG00000026163  | 4.144898204 |
| 55 | Bmp3          | ENSMUSG00000029335  | 4.139366775 |
| 56 | Il1rn         | ENSMUSG00000026981  | 4.091671943 |
| 57 | Hsp90b1       | ENSMUSG00000020048  | 4.073873276 |
| 58 | Clec4e        | ENSMUSG00000030142  | 4.040821306 |
| 59 | Prkc2         | ENSMUSG000000108314 | 4.038600449 |
| 60 | Dok5          | ENSMUSG00000027560  | 3.978150578 |
| 61 | E2f1          | ENSMUSG00000027490  | 3.975272909 |
| 62 | Hp            | ENSMUSG00000031722  | 3.959608332 |
| 63 | Hyou1         | ENSMUSG00000032115  | 3.944982062 |
| 64 | Fgf12         | ENSMUSG00000022523  | 3.939196334 |
| 65 | Sycp2         | ENSMUSG00000060445  | 3.935533061 |
| 66 | Gdf15         | ENSMUSG00000038508  | 3.934450583 |
| 67 | Rbm15b        | ENSMUSG00000074102  | 3.931228987 |
| 68 | Spp1          | ENSMUSG00000029304  | 3.740713979 |
| 69 | Ccl7          | ENSMUSG00000035373  | 3.738093438 |
| 70 | Tmem163       | ENSMUSG00000026347  | 3.731074518 |
| 71 | Gm7967        | ENSMUSG00000010009  | 3.730896653 |
| 72 | Adamts4       | ENSMUSG00000006403  | 3.718658173 |
| 73 | Xrcc3         | ENSMUSG00000021287  | 3.706565382 |
| 74 | Cxcr6         | ENSMUSG00000048521  | 3.700892285 |
| 75 | Plac8         | ENSMUSG00000029322  | 3.680345573 |
| 76 | Creld2        | ENSMUSG00000023272  | 3.666193145 |
| 77 | Tnc           | ENSMUSG00000028364  | 3.591714397 |
| 78 | Rxfp1         | ENSMUSG00000034009  | 3.535189978 |
| 79 | Tnfsf18       | ENSMUSG00000066755  | 3.524499913 |
| 80 | Ereg          | ENSMUSG00000029377  | 3.416991129 |
| 81 | Gm7901        | ENSMUSG000000101431 | 3.414907051 |
| 82 | Cxcl10        | ENSMUSG00000034855  | 3.389971448 |
| 83 | Card14        | ENSMUSG00000013483  | 3.357137465 |
| 84 | Aldh18a1      | ENSMUSG00000025007  | 3.34458723  |
| 85 | Dnajb11       | ENSMUSG00000004460  | 3.343407519 |
| 86 | Gm15344       | ENSMUSG00000084899  | 3.294729535 |
| 87 | Slc2a6        | ENSMUSG00000036067  | 3.284007038 |
| 88 | Ccr2          | ENSMUSG00000049103  | 3.277942748 |
| 89 | Cyp2e1        | ENSMUSG00000025479  | 3.272304905 |
| 90 | Lrp8          | ENSMUSG00000028613  | 3.2721959   |

|     |               |                    |             |
|-----|---------------|--------------------|-------------|
| 91  | Socs3         | ENSMUSG00000053113 | 3.254763524 |
| 92  | Hspa5         | ENSMUSG00000026864 | 3.226595312 |
| 93  | Tspyl2        | ENSMUSG00000041096 | 3.182915422 |
| 94  | Nxpe5         | ENSMUSG00000047592 | 3.170840319 |
| 95  | Slc27a3       | ENSMUSG00000027932 | 3.160858267 |
| 96  | Ch25h         | ENSMUSG00000050370 | 3.156766066 |
| 97  | Lman1l        | ENSMUSG00000056271 | 3.086917291 |
| 98  | Hn1l          | ENSMUSG00000024165 | 3.058111074 |
| 99  | D030028A08Rik | ENSMUSG00000078700 | 3.024411342 |
| 100 | Trib3         | ENSMUSG00000032715 | 3.01669847  |
| 101 | Oip5          | ENSMUSG00000072980 | 3.007680092 |
| 102 | Calr          | ENSMUSG00000003814 | 3.002423682 |
| 103 | Ptrh1         | ENSMUSG00000053746 | 2.996601041 |
| 104 | Sel1l         | ENSMUSG00000020964 | 2.984189709 |
| 105 | Pgp           | ENSMUSG00000043445 | 2.977330198 |
| 106 | Fhl1          | ENSMUSG00000023092 | 2.962677997 |
| 107 | Hspa1a        | ENSMUSG00000091971 | 2.946993662 |
| 108 | Akr1b3        | ENSMUSG00000001642 | 2.926261072 |
| 109 | Aldh1a2       | ENSMUSG00000013584 | 2.923052074 |
| 110 | Gm37006       | ENSMUSG00000103885 | 2.917999382 |
| 111 | Slfn4         | ENSMUSG00000000204 | 2.911860183 |
| 112 | Gm10097       | ENSMUSG00000096553 | 2.910195446 |
| 113 | F10           | ENSMUSG00000031444 | 2.898660594 |
| 114 | Gm12138       | ENSMUSG00000082087 | 2.871691575 |
| 115 | Cdkn2b        | ENSMUSG00000073802 | 2.859130135 |
| 116 | 4732465J04Rik | ENSMUSG00000101517 | 2.838500759 |
| 117 | Mt2           | ENSMUSG00000031762 | 2.836149018 |
| 118 | Serpina3n     | ENSMUSG00000021091 | 2.821965398 |
| 119 | Cilp2         | ENSMUSG00000044006 | 2.806837587 |
| 120 | Elk1          | ENSMUSG00000009406 | 2.803602336 |
| 121 | Ints3         | ENSMUSG00000027933 | 2.794929571 |
| 122 | Gm6644        | ENSMUSG00000100309 | 2.788194109 |
| 123 | 2610028H24Rik | ENSMUSG00000009114 | 2.776943846 |
| 124 | Lmntd1        | ENSMUSG00000054966 | 2.766244614 |
| 125 | B230217C12Rik | ENSMUSG00000050538 | 2.760138761 |
| 126 | Sele          | ENSMUSG00000026582 | 2.753570014 |
| 127 | Ebp           | ENSMUSG00000031168 | 2.744096448 |
| 128 | Alkbh2        | ENSMUSG00000044339 | 2.704625956 |
| 129 | Gm6736        | ENSMUSG00000071414 | 2.697352753 |
| 130 | Fgr           | ENSMUSG00000028874 | 2.688598098 |
| 131 | Eda2r         | ENSMUSG00000034457 | 2.682140385 |
| 132 | Serpina3g     | ENSMUSG00000041481 | 2.656149339 |
| 133 | Itgax         | ENSMUSG00000030789 | 2.646619905 |
| 134 | Hspa1b        | ENSMUSG00000090877 | 2.614593952 |
| 135 | Stbd1         | ENSMUSG00000047963 | 2.612770661 |
| 136 | Slc7a5        | ENSMUSG00000040010 | 2.611412306 |
| 137 | Fanca         | ENSMUSG00000032815 | 2.600943825 |

|     |               |                    |             |
|-----|---------------|--------------------|-------------|
| 138 | Gpr141        | ENSMUSG00000053101 | 2.599376007 |
| 139 | Myc           | ENSMUSG00000022346 | 2.593094825 |
| 140 | Gm9768        | ENSMUSG00000108391 | 2.589201067 |
| 141 | Serpina9      | ENSMUSG00000058260 | 2.569835526 |
| 142 | H2-Ke6        | ENSMUSG00000073422 | 2.539940112 |
| 143 | B430219N15Rik | ENSMUSG00000085211 | 2.535694452 |
| 144 | Lgals3        | ENSMUSG00000050335 | 2.519191675 |
| 145 | Pilra         | ENSMUSG00000046245 | 2.516259782 |
| 146 | Dolpp1        | ENSMUSG00000026856 | 2.514853363 |
| 147 | Gm43660       | ENSMUSG00000107352 | 2.505444971 |
| 148 | Gm3571        | ENSMUSG00000090610 | 2.49879397  |
| 149 | Pdia6         | ENSMUSG00000020571 | 2.490430091 |
| 150 | Ppp1r3d       | ENSMUSG00000049999 | 2.480900989 |
| 151 | Shisa6        | ENSMUSG00000053930 | 2.47963875  |
| 152 | Tnfrsf12a     | ENSMUSG00000023905 | 2.479420744 |
| 153 | Fos           | ENSMUSG00000021250 | 2.471681076 |
| 154 | C920009B18Rik | ENSMUSG00000097352 | 2.461909181 |
| 155 | Cpne5         | ENSMUSG00000024008 | 2.456456201 |
| 156 | Gm4841        | ENSMUSG00000068606 | 2.452944216 |
| 157 | Tfec          | ENSMUSG00000029553 | 2.45290359  |
| 158 | Cenpw         | ENSMUSG00000075266 | 2.449517084 |
| 159 | Tlr1          | ENSMUSG00000044827 | 2.449281283 |
| 160 | Gm24305       | ENSMUSG00000095590 | 2.445442278 |
| 161 | Gtse1         | ENSMUSG00000022385 | 2.431922128 |
| 162 | Gm29040       | ENSMUSG00000099576 | 2.428158893 |
| 163 | Rab26os       | ENSMUSG00000093565 | 2.423793102 |
| 164 | Arf2          | ENSMUSG00000062421 | 2.42044934  |
| 165 | Dnajc3        | ENSMUSG00000022136 | 2.41721018  |
| 166 | Cdk2ap2       | ENSMUSG00000024856 | 2.41009384  |
| 167 | 1200007C13Rik | ENSMUSG00000087684 | 2.390563475 |
| 168 | Clec4d        | ENSMUSG00000030144 | 2.384137488 |
| 169 | Cdkn1a        | ENSMUSG00000023067 | 2.375206669 |
| 170 | Hmox1         | ENSMUSG00000005413 | 2.374030372 |
| 171 | Ddias         | ENSMUSG00000030641 | 2.3659262   |
| 172 | Csf2rb2       | ENSMUSG00000071714 | 2.362173452 |
| 173 | 2210407C18Rik | ENSMUSG00000037145 | 2.360698164 |
| 174 | Dkk3          | ENSMUSG00000030772 | 2.36049145  |
| 175 | Gm26606       | ENSMUSG00000097337 | 2.358506742 |
| 176 | Lrrc71        | ENSMUSG00000023084 | 2.338508612 |
| 177 | Xbp1          | ENSMUSG00000020484 | 2.336362417 |
| 178 | Ncam1         | ENSMUSG00000039542 | 2.332206947 |
| 179 | Cxcl1         | ENSMUSG00000029380 | 2.332199941 |
| 180 | Gprin3        | ENSMUSG00000045441 | 2.317360823 |
| 181 | Sept5         | ENSMUSG00000072214 | 2.313294592 |
| 182 | Syvn1         | ENSMUSG00000024807 | 2.306530263 |
| 183 | Egr2          | ENSMUSG00000037868 | 2.304716168 |
| 184 | Thbs1         | ENSMUSG00000040152 | 2.295796614 |

|     |               |                    |             |
|-----|---------------|--------------------|-------------|
| 185 | Kcnc3         | ENSMUSG00000062785 | 2.290653415 |
| 186 | Kifc1         | ENSMUSG00000079553 | 2.287334021 |
| 187 | Gale          | ENSMUSG00000028671 | 2.284048043 |
| 188 | Nans          | ENSMUSG00000028334 | 2.275578636 |
| 189 | Nusap1        | ENSMUSG00000027306 | 2.255037554 |
| 190 | Rcan1         | ENSMUSG00000022951 | 2.212202653 |
| 191 | Slfn1         | ENSMUSG00000078763 | 2.212112935 |
| 192 | Gm17709       | ENSMUSG00000091952 | 2.209253708 |
| 193 | Avil          | ENSMUSG00000025432 | 2.201618781 |
| 194 | Mvd           | ENSMUSG00000006517 | 2.199845318 |
| 195 | Unc5c         | ENSMUSG00000059921 | 2.196062762 |
| 196 | Sesn2         | ENSMUSG00000028893 | 2.195520396 |
| 197 | Cdca3         | ENSMUSG00000023505 | 2.191457262 |
| 198 | Napsa         | ENSMUSG00000002204 | 2.188994743 |
| 199 | Chka          | ENSMUSG00000024843 | 2.186135159 |
| 200 | Zfp850        | ENSMUSG00000096916 | 2.184406999 |
| 201 | 2200002D01Rik | ENSMUSG00000030587 | 2.182975708 |
| 202 | Tbcb          | ENSMUSG00000006095 | 2.182783885 |
| 203 | Cenpk         | ENSMUSG00000021714 | 2.180064742 |
| 204 | Ormdl2        | ENSMUSG00000025353 | 2.177591587 |
| 205 | Clec4n        | ENSMUSG00000023349 | 2.172999515 |
| 206 | 2810474O19Rik | ENSMUSG00000032712 | 2.169593649 |
| 207 | Ms4a4c        | ENSMUSG00000024675 | 2.169515604 |
| 208 | Nde1          | ENSMUSG00000022678 | 2.146751019 |
| 209 | Serpina3i     | ENSMUSG00000079014 | 2.138122645 |
| 210 | Asf1b         | ENSMUSG00000005470 | 2.137415133 |
| 211 | Ears2         | ENSMUSG00000030871 | 2.137228298 |
| 212 | Gpr35         | ENSMUSG00000026271 | 2.134014304 |
| 213 | Junb          | ENSMUSG00000052837 | 2.133716588 |
| 214 | Spc25         | ENSMUSG00000005233 | 2.129056067 |
| 215 | Dmxl1         | ENSMUSG00000037416 | 2.127947217 |
| 216 | Msr1          | ENSMUSG00000025044 | 2.126320408 |
| 217 | Wfs1          | ENSMUSG00000039474 | 2.121447861 |
| 218 | Uck2          | ENSMUSG00000026558 | 2.113344049 |
| 219 | Zfp324        | ENSMUSG00000004500 | 2.097824653 |
| 220 | Adam8         | ENSMUSG00000025473 | 2.09172395  |
| 221 | Ccl12         | ENSMUSG00000035352 | 2.08771107  |
| 222 | Kctd8         | ENSMUSG00000037653 | 2.078933632 |
| 223 | Ntng2         | ENSMUSG00000035513 | 2.064808181 |
| 224 | Sfrp5         | ENSMUSG00000018822 | 2.061985858 |
| 225 | Pdia3         | ENSMUSG00000027248 | 2.058758685 |
| 226 | Sh2d5         | ENSMUSG00000045349 | 2.053762515 |
| 227 | Adamts15      | ENSMUSG00000033453 | 2.051962365 |
| 228 | Slamf8        | ENSMUSG00000053318 | 2.041095586 |
| 229 | Lad1          | ENSMUSG00000041782 | 2.039938823 |
| 230 | Nlrp3         | ENSMUSG00000032691 | 2.034710962 |
| 231 | Gm10130       | ENSMUSG00000095315 | 2.026437197 |



|     |               |                     |             |
|-----|---------------|---------------------|-------------|
| 232 | Eif1a         | ENSMUSG00000057561  | 2.022963037 |
| 233 | Samsn1        | ENSMUSG00000022876  | 2.017177449 |
| 234 | Ankrd42       | ENSMUSG00000041343  | 2.015608579 |
| 235 | Morf4l2       | ENSMUSG00000031422  | 2.003946107 |
| 236 | Slc6a9        | ENSMUSG00000028542  | 2.002328136 |
| 237 | Xlr3b         | ENSMUSG00000073125  | 2.002130317 |
| 238 | Piga          | ENSMUSG00000031381  | 2.001658825 |
| 239 | Nfil3         | ENSMUSG00000056749  | 1.997276455 |
| 240 | 1500015O10Rik | ENSMUSG00000026051  | 1.981376136 |
| 241 | Aldh1l2       | ENSMUSG00000020256  | 1.980183895 |
| 242 | Tpx2          | ENSMUSG00000027469  | 1.979014627 |
| 243 | Slc20a1       | ENSMUSG00000027397  | 1.978291357 |
| 244 | Blvrb         | ENSMUSG00000040466  | 1.971647348 |
| 245 | Hist1h2ab     | ENSMUSG00000061615  | 1.970698593 |
| 246 | Bex1          | ENSMUSG00000050071  | 1.963875025 |
| 247 | Tnf           | ENSMUSG00000024401  | 1.963341889 |
| 248 | Lrrc10b       | ENSMUSG00000090291  | 1.960004863 |
| 249 | D16Ert472e    | ENSMUSG00000022864  | 1.942668191 |
| 250 | 2900092N22Rik | ENSMUSG000000104034 | 1.935048799 |
| 251 | Pnpo          | ENSMUSG00000018659  | 1.933798517 |
| 252 | Adam12        | ENSMUSG00000054555  | 1.920686384 |
| 253 | Btg2          | ENSMUSG00000020423  | 1.919087802 |
| 254 | Chad          | ENSMUSG00000039084  | 1.916603137 |
| 255 | Idi1          | ENSMUSG00000058258  | 1.911564895 |
| 256 | M6pr-ps       | ENSMUSG00000080832  | 1.907252581 |
| 257 | Rtn4          | ENSMUSG00000020458  | 1.890110721 |
| 258 | Stx11         | ENSMUSG00000039232  | 1.877917576 |
| 259 | Vcp-rs        | ENSMUSG00000083327  | 1.866506145 |
| 260 | 2700038G22Rik | ENSMUSG00000097180  | 1.857497369 |
| 261 | Rnd1          | ENSMUSG00000054855  | 1.856688099 |
| 262 | Serpinh1      | ENSMUSG00000070436  | 1.856610681 |
| 263 | Vcp           | ENSMUSG00000028452  | 1.854155205 |
| 264 | Tubb4b-ps2    | ENSMUSG00000099997  | 1.853558273 |
| 265 | AW011738      | ENSMUSG00000078349  | 1.840325275 |
| 266 | Pin1          | ENSMUSG00000032171  | 1.829870336 |
| 267 | Pcdh11x       | ENSMUSG00000034755  | 1.829636281 |
| 268 | Mettl27       | ENSMUSG00000040557  | 1.827642833 |
| 269 |               | ENSMUSG00000064168  | 1.824874552 |
| 270 | Adamts8       | ENSMUSG00000031994  | 1.822492136 |
| 271 | Nfkbid        | ENSMUSG00000036931  | 1.821751403 |
| 272 | Nhp2          | ENSMUSG00000001056  | 1.821565655 |
| 273 | Icam4         | ENSMUSG00000001014  | 1.816106568 |
| 274 | Ginm1         | ENSMUSG00000040006  | 1.811234451 |
| 275 | Cd44          | ENSMUSG00000005087  | 1.806952418 |
| 276 | Tenm4         | ENSMUSG00000048078  | 1.806469533 |
| 277 | Ccnf          | ENSMUSG00000072082  | 1.79495856  |
| 278 | Gm28187       | ENSMUSG00000099375  | 1.790163645 |



|     |               |                    |             |
|-----|---------------|--------------------|-------------|
| 279 | AI506816      | ENSMUSG00000105987 | 1.786008502 |
| 280 | Tnfaip2       | ENSMUSG00000021281 | 1.780321378 |
| 281 | Gas2l3        | ENSMUSG00000074802 | 1.776794858 |
| 282 | Hsf2bp        | ENSMUSG00000002076 | 1.776085215 |
| 283 | Fasn          | ENSMUSG00000025153 | 1.772576521 |
| 284 | Rhoq          | ENSMUSG00000024143 | 1.77164729  |
| 285 | Zfp469        | ENSMUSG00000043903 | 1.764803209 |
| 286 | Rrp12         | ENSMUSG00000035049 | 1.764797566 |
| 287 | B3gnt5        | ENSMUSG00000022686 | 1.763194956 |
| 288 | Sqle          | ENSMUSG00000022351 | 1.74614843  |
| 289 | Gm44193       | ENSMUSG00000107559 | 1.744119957 |
| 290 | 2700078F05Rik | ENSMUSG00000103722 | 1.74092107  |
| 291 | Atf3          | ENSMUSG00000026628 | 1.736691794 |
| 292 | Dusp5         | ENSMUSG00000034765 | 1.735880351 |
| 293 | Armc7         | ENSMUSG00000057219 | 1.7290977   |
| 294 | Myrf1         | ENSMUSG00000034057 | 1.72736617  |
| 295 | BC022687      | ENSMUSG00000037594 | 1.724962995 |
| 296 | Uchl1         | ENSMUSG00000029223 | 1.723117731 |
| 297 | Mybl1         | ENSMUSG00000025912 | 1.712405563 |
| 298 | Snhg15        | ENSMUSG00000085156 | 1.708595817 |
| 299 | Trmt61a       | ENSMUSG00000060950 | 1.700813943 |
| 300 | Engase        | ENSMUSG00000033857 | 1.700119749 |
| 301 | Gm14857       | ENSMUSG00000081289 | 1.695715714 |
| 302 | Slc2a8        | ENSMUSG00000026791 | 1.69467734  |
| 303 | Hagh          | ENSMUSG00000024158 | 1.694606394 |
| 304 | Txnrd1        | ENSMUSG00000020250 | 1.692519589 |
| 305 | Cfp           | ENSMUSG00000001128 | 1.688643231 |
| 306 | Vwc2          | ENSMUSG00000050830 | 1.68668911  |
| 307 | Fam167a       | ENSMUSG00000035095 | 1.686618007 |
| 308 | Itgam         | ENSMUSG00000030786 | 1.682160168 |
| 309 | Ddit3         | ENSMUSG00000025408 | 1.681542641 |
| 310 | Map3k3        | ENSMUSG00000020700 | 1.675749333 |
| 311 | Pvt1          | ENSMUSG00000097039 | 1.675264628 |
| 312 | Bcl3          | ENSMUSG00000053175 | 1.673181926 |
| 313 | Cenpi         | ENSMUSG00000031262 | 1.673171107 |
| 314 | Slc1a4        | ENSMUSG00000020142 | 1.672319322 |
| 315 | Loxl4         | ENSMUSG00000025185 | 1.66021152  |
| 316 | Birc5         | ENSMUSG00000017716 | 1.655877869 |
| 317 | Emb           | ENSMUSG00000021728 | 1.650733426 |
| 318 | Sbno2         | ENSMUSG00000035673 | 1.650593127 |
| 319 | Ubald2        | ENSMUSG00000050628 | 1.650501705 |
| 320 | Chac1         | ENSMUSG00000027313 | 1.646133269 |
| 321 | Fst           | ENSMUSG00000021765 | 1.646130913 |
| 322 | Klra2         | ENSMUSG00000030187 | 1.645709693 |
| 323 | Uggt1         | ENSMUSG00000037470 | 1.644961843 |
| 324 | Mmp3          | ENSMUSG00000043613 | 1.642238674 |
| 325 | Gm9260        | ENSMUSG00000106239 | 1.638809044 |

|     |               |                    |             |
|-----|---------------|--------------------|-------------|
| 326 | Csf2rb        | ENSMUSG00000071713 | 1.638798976 |
| 327 | Arid4a        | ENSMUSG00000048118 | 1.637927577 |
| 328 | Mpv17l2       | ENSMUSG00000035559 | 1.637687304 |
| 329 | Egr1          | ENSMUSG00000038418 | 1.633002072 |
| 330 | Pgk1          | ENSMUSG00000062070 | 1.629109112 |
| 331 | Trp63         | ENSMUSG00000022510 | 1.62107416  |
| 332 | Tnni2         | ENSMUSG00000031097 | 1.618747065 |
| 333 | Cyb5r1        | ENSMUSG00000026456 | 1.609318021 |
| 334 | Slc17a7       | ENSMUSG00000070570 | 1.604700213 |
| 335 | Gm42725       | ENSMUSG00000105601 | 1.603763447 |
| 336 | Igf2bp2       | ENSMUSG00000033581 | 1.600812966 |
| 337 | Thop1         | ENSMUSG00000004929 | 1.600765487 |
| 338 | Suco          | ENSMUSG00000040297 | 1.598969712 |
| 339 | Sertad3       | ENSMUSG00000055200 | 1.598348345 |
| 340 | Ect2          | ENSMUSG00000027699 | 1.595965295 |
| 341 | Cd200r1       | ENSMUSG00000022667 | 1.595525098 |
| 342 | Cdca2         | ENSMUSG00000048922 | 1.595195402 |
| 343 | Shroom3       | ENSMUSG00000029381 | 1.581363529 |
| 344 | Cat           | ENSMUSG00000027187 | 1.581206905 |
| 345 | Isyna1        | ENSMUSG00000019139 | 1.580324046 |
| 346 | Gclm          | ENSMUSG00000028124 | 1.578931649 |
| 347 | Tuba1c        | ENSMUSG00000043091 | 1.578448169 |
| 348 | Ccr1          | ENSMUSG00000025804 | 1.577197402 |
| 349 | Ckap2         | ENSMUSG00000037725 | 1.570621326 |
| 350 | E2f8          | ENSMUSG00000046179 | 1.566293037 |
| 351 | Top2a         | ENSMUSG00000020914 | 1.564537824 |
| 352 | Gars          | ENSMUSG00000029777 | 1.563576397 |
| 353 | Pgbd5         | ENSMUSG00000050751 | 1.560744026 |
| 354 | Gm37018       | ENSMUSG00000102950 | 1.559964399 |
| 355 | Mxd1          | ENSMUSG00000001156 | 1.559822684 |
| 356 | 2310030G06Rik | ENSMUSG00000032062 | 1.558835095 |
| 357 | Gm12092       | ENSMUSG00000084850 | 1.557193143 |
| 358 | Os9           | ENSMUSG00000040462 | 1.556819869 |
| 359 | Calu          | ENSMUSG00000029767 | 1.552245573 |
| 360 | Sptlc2        | ENSMUSG00000021036 | 1.547928702 |
| 361 | Hmgcs1        | ENSMUSG00000093930 | 1.541408389 |
| 362 | Plek          | ENSMUSG00000020120 | 1.53988097  |
| 363 | Pemt          | ENSMUSG00000000301 | 1.539235376 |
| 364 | Spdl1         | ENSMUSG00000069910 | 1.535588415 |
| 365 | Appl1         | ENSMUSG00000040760 | 1.534526106 |
| 366 | Ankrd1        | ENSMUSG00000024803 | 1.532520407 |
| 367 | Agtrap        | ENSMUSG00000029007 | 1.530067499 |
| 368 | Odc1          | ENSMUSG00000011179 | 1.529290011 |
| 369 | Ccl11         | ENSMUSG00000020676 | 1.5290234   |
| 370 | Gm5526        | ENSMUSG00000084817 | 1.528484975 |
| 371 | Zfp593        | ENSMUSG00000028840 | 1.525871795 |
| 372 | Ppib          | ENSMUSG00000032383 | 1.525753398 |

|     |               |                    |             |
|-----|---------------|--------------------|-------------|
| 373 | Gm37258       | ENSMUSG00000102760 | 1.522556443 |
| 374 | Neto2         | ENSMUSG00000036902 | 1.516386822 |
| 375 | Kpnb1         | ENSMUSG00000001440 | 1.516098943 |
| 376 | Hist1h3g      | ENSMUSG00000099517 | 1.515072055 |
| 377 | Cks2          | ENSMUSG00000062248 | 1.50652198  |
| 378 | Gm37795       | ENSMUSG00000102813 | 1.506341996 |
| 379 | Pclaf         | ENSMUSG00000040204 | 1.505488381 |
| 380 | Cdk1          | ENSMUSG00000019942 | 1.502538423 |
| 381 | B230217O12Rik | ENSMUSG00000097785 | 1.502532816 |
| 382 | Cep55         | ENSMUSG00000024989 | 1.502132531 |
| 383 | Gm13481       | ENSMUSG00000086353 | 1.498347419 |
| 384 | Clec3a        | ENSMUSG00000008874 | 1.49783155  |
| 385 | Itga7         | ENSMUSG00000025348 | 1.49235615  |
| 386 | Cdc6          | ENSMUSG00000017499 | 1.487626593 |
| 387 | Pirt          | ENSMUSG00000048070 | 1.487265198 |
| 388 | Vcan          | ENSMUSG00000021614 | 1.484980991 |
| 389 | Flnc          | ENSMUSG00000068699 | 1.48355526  |
| 390 | Angptl6       | ENSMUSG00000038742 | 1.483255396 |
| 391 | Tbccd1        | ENSMUSG00000004462 | 1.480213903 |
| 392 | Lilrb4a       | ENSMUSG00000062593 | 1.478050587 |
| 393 | Gm14636       | ENSMUSG00000073274 | 1.477286849 |
| 394 | Hist2h2ab     | ENSMUSG00000063689 | 1.474500867 |
| 395 | Gm43499       | ENSMUSG00000106739 | 1.473440243 |
| 396 | Slc9a7        | ENSMUSG00000037341 | 1.47208978  |
| 397 | Pmm1          | ENSMUSG00000022474 | 1.469739665 |
| 398 | Lcp1          | ENSMUSG00000021998 | 1.465687722 |
| 399 | Togaram2      | ENSMUSG00000045761 | 1.462654704 |
| 400 | Kcnma1        | ENSMUSG00000063142 | 1.453088907 |
| 401 | Tubb4b        | ENSMUSG00000036752 | 1.451557295 |
| 402 | Gm10698       | ENSMUSG00000079884 | 1.45061928  |
| 403 | Al839979      | ENSMUSG00000107355 | 1.449119566 |
| 404 | Ccne1         | ENSMUSG00000002068 | 1.447445984 |
| 405 | Add3          | ENSMUSG00000025026 | 1.447244999 |
| 406 | Piwil2        | ENSMUSG00000033644 | 1.44722344  |
| 407 | Hist1h1a      | ENSMUSG00000049539 | 1.446221052 |
| 408 | Ptpn7         | ENSMUSG00000031506 | 1.445728984 |
| 409 | Gm42514       | ENSMUSG00000105553 | 1.442490661 |
| 410 | Ctps          | ENSMUSG00000028633 | 1.438371947 |
| 411 | Coro1a        | ENSMUSG00000030707 | 1.437823862 |
| 412 | Rasef         | ENSMUSG00000043003 | 1.437469131 |
| 413 | Mgl2          | ENSMUSG00000040950 | 1.436187652 |
| 414 | Mettl1        | ENSMUSG00000006732 | 1.436107039 |
| 415 | Icam1         | ENSMUSG00000037405 | 1.435857964 |
| 416 | Tnfaip6       | ENSMUSG00000053475 | 1.435627103 |
| 417 | Acta2         | ENSMUSG00000035783 | 1.435284206 |
| 418 | Atf4          | ENSMUSG00000042406 | 1.433688739 |
| 419 | Copz1         | ENSMUSG00000060992 | 1.430038805 |

|     |               |                    |             |
|-----|---------------|--------------------|-------------|
| 420 | Gm5621        | ENSMUSG00000057626 | 1.429304345 |
| 421 | Cd52          | ENSMUSG00000000682 | 1.428954184 |
| 422 | 1110038B12Rik | ENSMUSG00000092203 | 1.428291662 |
| 423 | Spryd3        | ENSMUSG00000036966 | 1.427522411 |
| 424 | Slc1a2        | ENSMUSG00000005089 | 1.426300546 |
| 425 | Tubb2a        | ENSMUSG00000058672 | 1.421754195 |
| 426 | Pold4         | ENSMUSG00000024854 | 1.420881931 |
| 427 | Wisp1         | ENSMUSG00000005124 | 1.417477785 |
| 428 | Dpep2         | ENSMUSG00000053687 | 1.41535261  |
| 429 | Ms4a6d        | ENSMUSG00000024679 | 1.411589263 |
| 430 | Dtl           | ENSMUSG00000037474 | 1.409796483 |
| 431 | Siah2         | ENSMUSG00000036432 | 1.408822208 |
| 432 | Stox2         | ENSMUSG00000038143 | 1.407948117 |
| 433 | Gadd45g       | ENSMUSG00000021453 | 1.407408956 |
| 434 | Gm12989       | ENSMUSG00000083678 | 1.404923716 |
| 435 | Mcm10         | ENSMUSG00000026669 | 1.403036914 |
| 436 | Shank1        | ENSMUSG00000038738 | 1.401781001 |
| 437 | Casq1         | ENSMUSG00000007122 | 1.400434602 |
| 438 | Ddx39         | ENSMUSG00000005481 | 1.39988641  |
| 439 | Kif4          | ENSMUSG00000034311 | 1.399067027 |
| 440 | Ssr3          | ENSMUSG00000027828 | 1.398708309 |
| 441 | Hist1h3b      | ENSMUSG00000069267 | 1.394372841 |
| 442 | Tfcp2l1       | ENSMUSG00000026380 | 1.393161629 |
| 443 | Taf13         | ENSMUSG00000048100 | 1.392998942 |
| 444 | Gm7993        | ENSMUSG00000107092 | 1.388597857 |
| 445 | Gm45531       | ENSMUSG00000110353 | 1.387891961 |
| 446 | Gm1966        | ENSMUSG00000073902 | 1.387819539 |
| 447 | Chek1         | ENSMUSG00000032113 | 1.38723691  |
| 448 | Sptbn4        | ENSMUSG00000011751 | 1.386241892 |
| 449 | Rp2           | ENSMUSG00000060090 | 1.385912245 |
| 450 | Atf5          | ENSMUSG00000038539 | 1.385340179 |
| 451 | Dcaf11        | ENSMUSG00000022214 | 1.381885962 |
| 452 | Fam46b        | ENSMUSG00000046694 | 1.378167116 |
| 453 | Ckap4         | ENSMUSG00000046841 | 1.377983134 |
| 454 | Ccnb2         | ENSMUSG00000032218 | 1.375884366 |
| 455 | Slc39a14      | ENSMUSG00000022094 | 1.373201831 |
| 456 | Gcat          | ENSMUSG00000006378 | 1.372933003 |
| 457 | Parvg         | ENSMUSG00000022439 | 1.372192156 |
| 458 | Dlg2          | ENSMUSG00000052572 | 1.371734306 |
| 459 | Fzd5          | ENSMUSG00000045005 | 1.371696261 |
| 460 | Fam26e        | ENSMUSG00000049872 | 1.367206577 |
| 461 | Il33          | ENSMUSG00000024810 | 1.363591102 |
| 462 | Col8a2        | ENSMUSG00000056174 | 1.363224893 |
| 463 | Kn1           | ENSMUSG00000027326 | 1.362172771 |
| 464 | Tubb4b-ps1    | ENSMUSG00000095159 | 1.361518755 |
| 465 | Gmppb         | ENSMUSG00000070284 | 1.360384561 |
| 466 | Edem1         | ENSMUSG00000030104 | 1.359504073 |

|     |               |                     |             |
|-----|---------------|---------------------|-------------|
| 467 | Xpo1          | ENSMUSG00000020290  | 1.358919462 |
| 468 | Mmp9          | ENSMUSG00000017737  | 1.354393221 |
| 469 | B4galt5       | ENSMUSG00000017929  | 1.346974419 |
| 470 | Prg4          | ENSMUSG00000006014  | 1.342563561 |
| 471 | Snhg5         | ENSMUSG00000097195  | 1.338052351 |
| 472 | Gm12250       | ENSMUSG00000082292  | 1.336648238 |
| 473 | Nr6a1         | ENSMUSG00000063972  | 1.335957529 |
| 474 | Brca1         | ENSMUSG00000017146  | 1.335918773 |
| 475 | Rufy4         | ENSMUSG00000061815  | 1.335781939 |
| 476 | Wdr46         | ENSMUSG00000024312  | 1.335465454 |
| 477 | Pask          | ENSMUSG00000026274  | 1.335125088 |
| 478 | Pgk1-rs7      | ENSMUSG00000066632  | 1.333537124 |
| 479 | Ccl9          | ENSMUSG00000019122  | 1.331399831 |
| 480 | Gm6158        | ENSMUSG00000090381  | 1.330544091 |
| 481 | Uhrf1         | ENSMUSG00000001228  | 1.324781216 |
| 482 | Ush1c         | ENSMUSG00000030838  | 1.319572423 |
| 483 | Aldh1a3       | ENSMUSG00000015134  | 1.318057841 |
| 484 | Cdca8         | ENSMUSG00000028873  | 1.317159825 |
| 485 | Ncf4          | ENSMUSG00000071715  | 1.313516064 |
| 486 | Fbxo36        | ENSMUSG00000073633  | 1.312734301 |
| 487 | Col12a1       | ENSMUSG00000032332  | 1.311033634 |
| 488 | Shisa3        | ENSMUSG00000050010  | 1.311018626 |
| 489 | Tbrg1         | ENSMUSG00000011114  | 1.311000765 |
| 490 | Ccr5          | ENSMUSG00000079227  | 1.310358961 |
| 491 | Gm15328       | ENSMUSG00000086095  | 1.308210775 |
| 492 | Derl2         | ENSMUSG00000018442  | 1.307259566 |
| 493 | Pde4b         | ENSMUSG00000028525  | 1.306643448 |
| 494 | Nr2c2ap       | ENSMUSG00000071078  | 1.304422618 |
| 495 | Kif9          | ENSMUSG00000032489  | 1.302670479 |
| 496 | Herpud1       | ENSMUSG00000031770  | 1.302564699 |
| 497 | Slc41a3       | ENSMUSG00000030089  | 1.30110197  |
| 498 | Kcnq1ot1      | ENSMUSG000000101609 | 1.300853761 |
| 499 | Ppa1          | ENSMUSG00000020089  | 1.299245627 |
| 500 | Pdk3          | ENSMUSG00000035232  | 1.298552717 |
| 501 | Arid5a        | ENSMUSG00000037447  | 1.297558156 |
| 502 | F730043M19Rik | ENSMUSG00000052125  | 1.29514611  |
| 503 | Atp8b4        | ENSMUSG00000060131  | 1.294764027 |
| 504 | Eef1e1        | ENSMUSG00000001707  | 1.293534944 |
| 505 | Dcbld2        | ENSMUSG00000035107  | 1.290393328 |
| 506 | Spn           | ENSMUSG00000051457  | 1.290033875 |
| 507 | B4galnt1      | ENSMUSG00000006731  | 1.28891425  |
| 508 | Msrb1         | ENSMUSG00000075705  | 1.281903924 |
| 509 | Zfp697        | ENSMUSG00000050064  | 1.279477024 |
| 510 | Lrrc49        | ENSMUSG00000047766  | 1.276088543 |
| 511 | Rfx7          | ENSMUSG00000037674  | 1.274375178 |
| 512 | Rras2         | ENSMUSG00000055723  | 1.273857494 |
| 513 | B930095G15Rik | ENSMUSG00000085133  | 1.273024667 |

|     |               |                    |             |
|-----|---------------|--------------------|-------------|
| 514 | 6430548M08Rik | ENSMUSG00000031824 | 1.2728817   |
| 515 | Hs3st3b1      | ENSMUSG00000070407 | 1.272752395 |
| 516 | Pak4          | ENSMUSG00000030602 | 1.271858364 |
| 517 | Rpl3-ps1      | ENSMUSG00000084349 | 1.269581012 |
| 518 | Dcun1d4       | ENSMUSG00000051674 | 1.269561257 |
| 519 | Tmem189       | ENSMUSG00000090213 | 1.268538681 |
| 520 | Hcn1          | ENSMUSG00000021730 | 1.268156092 |
| 521 | Tmem50b       | ENSMUSG00000022964 | 1.267450664 |
| 522 | Lpin3         | ENSMUSG00000027412 | 1.267349798 |
| 523 | Wbp1          | ENSMUSG00000030035 | 1.266661045 |
| 524 | Pim1          | ENSMUSG00000024014 | 1.265560591 |
| 525 | Ncapg         | ENSMUSG00000015880 | 1.2654372   |
| 526 | Hectd2os      | ENSMUSG00000087579 | 1.264197733 |
| 527 | Nipsnap3b     | ENSMUSG00000015247 | 1.263768222 |
| 528 | G530011O06Rik | ENSMUSG00000072844 | 1.263713637 |
| 529 | Esd           | ENSMUSG00000021996 | 1.261243754 |
| 530 | Otub2         | ENSMUSG00000021203 | 1.259221277 |
| 531 | Tctn2         | ENSMUSG00000029386 | 1.258207556 |
| 532 | Mum1l1        | ENSMUSG00000042515 | 1.257306282 |
| 533 | Npl           | ENSMUSG00000042684 | 1.251704294 |
| 534 | Slc10a3       | ENSMUSG00000032806 | 1.251594014 |
| 535 | Nme1          | ENSMUSG00000037601 | 1.248493132 |
| 536 | Cass4         | ENSMUSG00000074570 | 1.247895241 |
| 537 | Mfsd12        | ENSMUSG00000034854 | 1.247329755 |
| 538 | Nppb          | ENSMUSG00000029019 | 1.247247828 |
| 539 | Mesd          | ENSMUSG00000038503 | 1.245358334 |
| 540 | Eif2ak3       | ENSMUSG00000031668 | 1.244652688 |
| 541 | Gm7367        | ENSMUSG00000047370 | 1.237312066 |
| 542 | Kcnj5         | ENSMUSG00000032034 | 1.236827526 |
| 543 | Tfg           | ENSMUSG00000022757 | 1.23233869  |
| 544 | 6430710C18Rik | ENSMUSG00000085427 | 1.231385968 |
| 545 | Phlda3        | ENSMUSG00000041801 | 1.231236934 |
| 546 | Rgs7bp        | ENSMUSG00000021719 | 1.228422741 |
| 547 | Ostc          | ENSMUSG00000041084 | 1.226963586 |
| 548 | Adat3         | ENSMUSG00000035370 | 1.224450689 |
| 549 | Mafk          | ENSMUSG00000018143 | 1.224360772 |
| 550 | Ccna2         | ENSMUSG00000027715 | 1.22429789  |
| 551 | Stat3         | ENSMUSG00000004040 | 1.220096548 |
| 552 | Fam122b       | ENSMUSG00000036022 | 1.214434032 |
| 553 | Usp18         | ENSMUSG00000030107 | 1.213368784 |
| 554 | Esyt1         | ENSMUSG00000025366 | 1.210954025 |
| 555 | Alcam         | ENSMUSG00000022636 | 1.210629983 |
| 556 | Mki67         | ENSMUSG00000031004 | 1.206938756 |
| 557 | Psm5          | ENSMUSG00000068749 | 1.206060018 |
| 558 | Cars          | ENSMUSG00000010755 | 1.205057184 |
| 559 | Spag5         | ENSMUSG0000002055  | 1.205018018 |
| 560 | Ptgs2         | ENSMUSG00000032487 | 1.203540576 |



|     |            |                    |             |
|-----|------------|--------------------|-------------|
| 561 | Akip1      | ENSMUSG00000031023 | 1.202559927 |
| 562 | Myh7       | ENSMUSG00000053093 | 1.20046659  |
| 563 | Trim16     | ENSMUSG00000047821 | 1.200163728 |
| 564 | Hsp90aa1   | ENSMUSG00000021270 | 1.198763826 |
| 565 | Zbp1       | ENSMUSG00000027514 | 1.198082831 |
| 566 | Tfrc       | ENSMUSG00000022797 | 1.197497585 |
| 567 | Tmem173    | ENSMUSG00000024349 | 1.196917013 |
| 568 | Rrp9       | ENSMUSG00000041506 | 1.196173589 |
| 569 | Ccl8       | ENSMUSG00000009185 | 1.195247161 |
| 570 | Aspm       | ENSMUSG00000033952 | 1.194041169 |
| 571 | Gm38359    | ENSMUSG00000103317 | 1.193897614 |
| 572 | Dok2       | ENSMUSG00000022102 | 1.193717167 |
| 573 | Tyk2       | ENSMUSG00000032175 | 1.190501275 |
| 574 | Esco2      | ENSMUSG00000022034 | 1.185134026 |
| 575 | Rpl3       | ENSMUSG00000060036 | 1.183677711 |
| 576 | Rpl10      | ENSMUSG00000008682 | 1.183173662 |
| 577 | Cenpn      | ENSMUSG00000031756 | 1.182370776 |
| 578 | Casp4      | ENSMUSG00000033538 | 1.181148662 |
| 579 | Gm7332     | ENSMUSG00000080875 | 1.175857669 |
| 580 | Zbtb3      | ENSMUSG00000071661 | 1.175706805 |
| 581 | D10Wsu102e | ENSMUSG00000020255 | 1.175461387 |
| 582 | Fam72a     | ENSMUSG00000055184 | 1.174842741 |
| 583 | Gipc1      | ENSMUSG00000019433 | 1.173894119 |
| 584 | Hspa1l     | ENSMUSG00000007033 | 1.172493484 |
| 585 | Stt3b      | ENSMUSG00000032437 | 1.170914991 |
| 586 | Itgb2      | ENSMUSG00000000290 | 1.169997355 |
| 587 | Arrdc3     | ENSMUSG00000074794 | 1.169678464 |
| 588 | Nudcd1     | ENSMUSG00000038736 | 1.168817163 |
| 589 | Pik3r3     | ENSMUSG00000028698 | 1.167333543 |
| 590 | Ppan       | ENSMUSG00000004100 | 1.166826929 |
| 591 | Clec11a    | ENSMUSG00000004473 | 1.164850642 |
| 592 | Nr4a2      | ENSMUSG00000026826 | 1.163633754 |
| 593 | Trmt10a    | ENSMUSG00000004127 | 1.162878389 |
| 594 | Plxnb2     | ENSMUSG00000036606 | 1.161690849 |
| 595 | Gja5       | ENSMUSG00000057123 | 1.160544506 |
| 596 | Hist1h2af  | ENSMUSG00000061991 | 1.159729615 |
| 597 | Slc16a6    | ENSMUSG00000041920 | 1.157421983 |
| 598 | Mdn1       | ENSMUSG00000058006 | 1.157364083 |
| 599 | Capg       | ENSMUSG00000056737 | 1.156060338 |
| 600 | Anln       | ENSMUSG00000036777 | 1.156054529 |
| 601 | Sash3      | ENSMUSG00000031101 | 1.153727702 |
| 602 | Dbf4       | ENSMUSG00000002297 | 1.15302495  |
| 603 | Ttf2       | ENSMUSG00000033222 | 1.152826279 |
| 604 | Gm8394     | ENSMUSG00000050490 | 1.152190004 |
| 605 | Hck        | ENSMUSG00000003283 | 1.149489868 |
| 606 | Cage1      | ENSMUSG00000044566 | 1.146471431 |
| 607 | Knstrn     | ENSMUSG00000027331 | 1.146277923 |



|     |               |                    |             |
|-----|---------------|--------------------|-------------|
| 608 | Fzd2          | ENSMUSG00000050288 | 1.145634205 |
| 609 | Mx1           | ENSMUSG00000000386 | 1.14494589  |
| 610 | Dstn          | ENSMUSG00000015932 | 1.142341577 |
| 611 | Tlr2          | ENSMUSG00000027995 | 1.141801924 |
| 612 | Usp1          | ENSMUSG00000028560 | 1.140379401 |
| 613 | Prkcsh        | ENSMUSG00000003402 | 1.140233021 |
| 614 | Ptpre         | ENSMUSG00000041836 | 1.138809485 |
| 615 | Dph5          | ENSMUSG00000033554 | 1.13657609  |
| 616 | Srpx          | ENSMUSG00000090084 | 1.134293016 |
| 617 | Olfm1         | ENSMUSG00000026833 | 1.133848828 |
| 618 | Heatr1        | ENSMUSG00000050244 | 1.133491875 |
| 619 | Azin1         | ENSMUSG00000037458 | 1.132883442 |
| 620 | Rpsa-ps9      | ENSMUSG00000082895 | 1.132775108 |
| 621 | Ppp1r15a      | ENSMUSG00000040435 | 1.131558837 |
| 622 | Snhg1         | ENSMUSG00000108414 | 1.130862556 |
| 623 | Grk3          | ENSMUSG00000042249 | 1.130640537 |
| 624 | Aurka         | ENSMUSG00000027496 | 1.129311021 |
| 625 | Ift43         | ENSMUSG00000007867 | 1.127582151 |
| 626 | Ing1          | ENSMUSG00000045969 | 1.125978778 |
| 627 | Zfp566        | ENSMUSG00000078768 | 1.125891655 |
| 628 | Fgl2          | ENSMUSG00000039899 | 1.123987257 |
| 629 | Pdpm          | ENSMUSG00000028583 | 1.122759466 |
| 630 | Asb16         | ENSMUSG00000034768 | 1.122276057 |
| 631 | Aqp4          | ENSMUSG00000024411 | 1.122151756 |
| 632 | Aars          | ENSMUSG00000031960 | 1.120957875 |
| 633 | Dusp23        | ENSMUSG00000026544 | 1.11810292  |
| 634 | Paip2b        | ENSMUSG00000045896 | 1.115897527 |
| 635 | Gstcd         | ENSMUSG00000028018 | 1.115730709 |
| 636 | Coq8b         | ENSMUSG00000003762 | 1.115288686 |
| 637 | Rap2b         | ENSMUSG00000036894 | 1.114326427 |
| 638 | Cntn2         | ENSMUSG00000053024 | 1.112534684 |
| 639 | Zmynd19       | ENSMUSG00000026974 | 1.111641171 |
| 640 | Tmbim1        | ENSMUSG00000006301 | 1.111517063 |
| 641 | Grk5          | ENSMUSG00000003228 | 1.110747505 |
| 642 | Tmed2         | ENSMUSG00000029390 | 1.109476899 |
| 643 | Smyd5         | ENSMUSG00000033706 | 1.102683445 |
| 644 | Ibtk          | ENSMUSG00000035941 | 1.101475027 |
| 645 | C330027C09Rik | ENSMUSG00000033031 | 1.099547502 |
| 646 | Abca12        | ENSMUSG00000050296 | 1.095786221 |
| 647 | Vars          | ENSMUSG00000007029 | 1.093832221 |
| 648 | Sars          | ENSMUSG00000068739 | 1.093735011 |
| 649 | Map2k3os      | ENSMUSG00000042549 | 1.091347636 |
| 650 | Gm6210        | ENSMUSG00000107951 | 1.089886298 |
| 651 | Lmbrd2        | ENSMUSG00000039704 | 1.087412152 |
| 652 | Stip1         | ENSMUSG00000024966 | 1.086537039 |
| 653 | Ubfd1         | ENSMUSG00000030870 | 1.085322293 |
| 654 | Tubb6         | ENSMUSG00000001473 | 1.085001017 |

|     |           |                    |             |
|-----|-----------|--------------------|-------------|
| 655 | Ung       | ENSMUSG00000029591 | 1.08455813  |
| 656 | Socs1     | ENSMUSG00000038037 | 1.083140057 |
| 657 | Shq1      | ENSMUSG00000035378 | 1.082574401 |
| 658 | Tiam2     | ENSMUSG00000023800 | 1.082496268 |
| 659 | Hist1h2ac | ENSMUSG00000069270 | 1.082203199 |
| 660 | Nol12     | ENSMUSG00000033099 | 1.082003866 |
| 661 | Dpy19l1   | ENSMUSG00000043067 | 1.079606873 |
| 662 | Arrdc4    | ENSMUSG00000042659 | 1.079340688 |
| 663 | Plk4      | ENSMUSG00000025758 | 1.078923652 |
| 664 | Avpi1     | ENSMUSG00000018821 | 1.078296992 |
| 665 | Wdr44     | ENSMUSG00000036769 | 1.077086586 |
| 666 | Runx1     | ENSMUSG00000022952 | 1.076810666 |
| 667 | Tmem45a   | ENSMUSG00000022754 | 1.076558315 |
| 668 | Opn3      | ENSMUSG00000026525 | 1.073604491 |
| 669 | Ppox      | ENSMUSG00000062729 | 1.073267217 |
| 670 | Bbc3      | ENSMUSG00000002083 | 1.072287344 |
| 671 | Iars      | ENSMUSG00000037851 | 1.071964574 |
| 672 | Gsk3b     | ENSMUSG00000022812 | 1.070813224 |
| 673 | Clcf1     | ENSMUSG00000040663 | 1.064614037 |
| 674 | Tesk2     | ENSMUSG00000033985 | 1.063742128 |
| 675 | Cenpt     | ENSMUSG00000036672 | 1.06146737  |
| 676 | Ttc41     | ENSMUSG00000044937 | 1.061089629 |
| 677 | Cdc7      | ENSMUSG00000029283 | 1.059243045 |
| 678 | Gpatch4   | ENSMUSG00000028069 | 1.05907009  |
| 679 | Gm12346   | ENSMUSG00000083899 | 1.058665929 |
| 680 | Has2      | ENSMUSG00000022367 | 1.057616501 |
| 681 | Pold2     | ENSMUSG00000020471 | 1.056373421 |
| 682 | Pim2      | ENSMUSG00000031155 | 1.054490917 |
| 683 | Slc26a2   | ENSMUSG00000034320 | 1.05224895  |
| 684 | Phkg2     | ENSMUSG00000030815 | 1.052031009 |
| 685 | Vbp1      | ENSMUSG00000031197 | 1.051255794 |
| 686 | Bcat1     | ENSMUSG00000030268 | 1.050279226 |
| 687 | Tmem184c  | ENSMUSG00000031617 | 1.049938119 |
| 688 | Gm5812    | ENSMUSG00000051639 | 1.048363636 |
| 689 | Cers6     | ENSMUSG00000027035 | 1.047851043 |
| 690 | Il17ra    | ENSMUSG00000002897 | 1.047462251 |
| 691 | Derl1     | ENSMUSG00000022365 | 1.047444175 |
| 692 | Wif1      | ENSMUSG00000020218 | 1.047119083 |
| 693 | Cks1b     | ENSMUSG00000028044 | 1.046554899 |
| 694 | Ccdc134   | ENSMUSG00000068114 | 1.045129946 |
| 695 | Farp1     | ENSMUSG00000025555 | 1.04389361  |
| 696 | Tars      | ENSMUSG00000022241 | 1.043266521 |
| 697 | Rpn2      | ENSMUSG00000027642 | 1.039931574 |
| 698 | Nop16     | ENSMUSG00000025869 | 1.03963659  |
| 699 | Msmo1     | ENSMUSG00000031604 | 1.038855593 |
| 700 | Cdv3-ps   | ENSMUSG00000090389 | 1.037316451 |
| 701 | Yif1a     | ENSMUSG00000024875 | 1.037258808 |

|     |               |                    |             |
|-----|---------------|--------------------|-------------|
| 702 | Zfp568        | ENSMUSG00000074221 | 1.036068891 |
| 703 | Col7a1        | ENSMUSG00000025650 | 1.034000942 |
| 704 | Oasl1         | ENSMUSG00000041827 | 1.033131634 |
| 705 | Mcfd2         | ENSMUSG00000024150 | 1.025906718 |
| 706 | Slc7a7        | ENSMUSG00000000958 | 1.025602479 |
| 707 | Rab6a         | ENSMUSG00000030704 | 1.024779016 |
| 708 | Erp29         | ENSMUSG00000029616 | 1.02083526  |
| 709 | 1810055G02Rik | ENSMUSG00000035372 | 1.01858213  |
| 710 | Lrrc59        | ENSMUSG00000020869 | 1.018185595 |
| 711 | Heatr5a       | ENSMUSG00000035181 | 1.018091303 |
| 712 | Marcks1       | ENSMUSG00000047945 | 1.017402547 |
| 713 | Mvp           | ENSMUSG00000030681 | 1.017384365 |
| 714 | Per1          | ENSMUSG00000020893 | 1.017223008 |
| 715 | Aif1          | ENSMUSG00000024397 | 1.016551272 |
| 716 | Gn13          | ENSMUSG00000042354 | 1.01648494  |
| 717 | Hells         | ENSMUSG00000025001 | 1.016223913 |
| 718 | Mcm5          | ENSMUSG00000005410 | 1.0143332   |
| 719 | N4bp2os       | ENSMUSG00000106978 | 1.013382364 |
| 720 | Krt80         | ENSMUSG00000037185 | 1.012635222 |
| 721 | Hist1h2bb     | ENSMUSG00000075031 | 1.01137536  |
| 722 | Psm11         | ENSMUSG00000017428 | 1.011018617 |
| 723 | Nsdhl         | ENSMUSG00000031349 | 1.010787814 |
| 724 | Fam174b       | ENSMUSG00000078670 | 1.010025926 |
| 725 | Gm7895        | ENSMUSG00000100347 | 1.009476227 |
| 726 | Gm25360       | ENSMUSG00000094655 | 1.009366206 |
| 727 | St6galnac4    | ENSMUSG00000079442 | 1.009190701 |
| 728 | Steap2        | ENSMUSG00000015653 | 1.008242338 |
| 729 | M6pr          | ENSMUSG00000007458 | 1.007816687 |
| 730 | Spi1          | ENSMUSG00000002111 | 1.005558321 |
| 731 | Srm           | ENSMUSG00000006442 | 1.005149292 |
| 732 | Gm6563        | ENSMUSG00000051255 | 1.004539333 |
| 733 | Cmtr2         | ENSMUSG00000046441 | 1.004455668 |
| 734 | Isoc2a        | ENSMUSG00000086784 | 1.002035749 |
| 735 | Mob3c         | ENSMUSG00000028709 | 1.001988325 |
| 736 | Atad5         | ENSMUSG00000017550 | 1.000331972 |
| 737 | Kcnn3         | ENSMUSG00000000794 | 0.99982441  |
| 738 | Dnajb9        | ENSMUSG00000014905 | 0.999482146 |
| 739 | B230216N24Rik | ENSMUSG00000089706 | 0.999150399 |
| 740 | Olfml2b       | ENSMUSG00000038463 | 0.998856338 |
| 741 | Col11a2       | ENSMUSG00000024330 | 0.99846639  |
| 742 | Bambi         | ENSMUSG00000024232 | 0.998400037 |
| 743 | Cotl1         | ENSMUSG00000031827 | 0.997762408 |
| 744 | Snap23        | ENSMUSG00000027287 | 0.99717774  |
| 745 | Mak16         | ENSMUSG00000031578 | 0.996282623 |
| 746 | Rnf5          | ENSMUSG00000015478 | 0.995026243 |
| 747 | Snhg4         | ENSMUSG00000097769 | 0.994877612 |
| 748 | Dusp8         | ENSMUSG00000037887 | 0.992982688 |

|     |          |                     |             |
|-----|----------|---------------------|-------------|
| 749 | Shisa4   | ENSMUSG00000041889  | 0.991855458 |
| 750 | Gsg1l    | ENSMUSG00000046182  | 0.991643791 |
| 751 | Canx     | ENSMUSG00000020368  | 0.99103089  |
| 752 | Gm8203   | ENSMUSG000000101878 | 0.989511615 |
| 753 | Armc6    | ENSMUSG00000002343  | 0.989498202 |
| 754 | Slx4ip   | ENSMUSG00000027281  | 0.98930013  |
| 755 | Gm13456  | ENSMUSG00000082536  | 0.988812863 |
| 756 | Ints2    | ENSMUSG00000018068  | 0.987187817 |
| 757 | Golt1b   | ENSMUSG00000030245  | 0.985137192 |
| 758 | Hspb1    | ENSMUSG00000004951  | 0.984501964 |
| 759 | Rpf2     | ENSMUSG00000038510  | 0.984054313 |
| 760 | Scml4    | ENSMUSG00000044770  | 0.983279986 |
| 761 | Ppp1r14b | ENSMUSG00000056612  | 0.982912048 |
| 762 | Nme6     | ENSMUSG00000032478  | 0.982882597 |
| 763 | Ccl6     | ENSMUSG00000018927  | 0.982589258 |
| 764 | Lhfpl2   | ENSMUSG00000045312  | 0.980846806 |
| 765 | Rnf181   | ENSMUSG00000055850  | 0.980432741 |
| 766 | Mb21d1   | ENSMUSG00000032344  | 0.980115292 |
| 767 | Cad      | ENSMUSG00000013629  | 0.979420976 |
| 768 | Got1     | ENSMUSG00000025190  | 0.979355287 |
| 769 | Lmcd1    | ENSMUSG00000057604  | 0.978649847 |
| 770 | Lamc2    | ENSMUSG00000026479  | 0.97554956  |
| 771 | Cyld     | ENSMUSG00000036712  | 0.974943338 |
| 772 | Nktr     | ENSMUSG00000032525  | 0.971355026 |
| 773 | Gm4540   | ENSMUSG00000092072  | 0.971285941 |
| 774 | Cnpy3    | ENSMUSG00000023973  | 0.971164845 |
| 775 | Glipr2   | ENSMUSG00000028480  | 0.970473478 |
| 776 | Fam98c   | ENSMUSG00000030590  | 0.97018368  |
| 777 | Bcl6     | ENSMUSG00000022508  | 0.969489625 |
| 778 | Stat2    | ENSMUSG00000040033  | 0.96069757  |
| 779 | Gm14048  | ENSMUSG00000080989  | 0.959293156 |
| 780 | Zdhhc24  | ENSMUSG00000006463  | 0.958629392 |
| 781 | Ifi211   | ENSMUSG00000026536  | 0.957641599 |
| 782 | Gm12655  | ENSMUSG00000087128  | 0.95733895  |
| 783 | Map1b    | ENSMUSG00000052727  | 0.95634716  |
| 784 | Il6st    | ENSMUSG00000021756  | 0.95314068  |
| 785 | Pck2     | ENSMUSG00000040618  | 0.953104793 |
| 786 | Ubtd1    | ENSMUSG00000025171  | 0.952484985 |
| 787 | Gm13127  | ENSMUSG00000070610  | 0.952072131 |
| 788 | Il4ra    | ENSMUSG00000030748  | 0.950384327 |
| 789 | Suv39h2  | ENSMUSG00000026646  | 0.950314164 |
| 790 | Hgf      | ENSMUSG00000028864  | 0.949086932 |
| 791 | Hmgcr    | ENSMUSG00000021670  | 0.948321994 |
| 792 | Stk19    | ENSMUSG00000061207  | 0.94671894  |
| 793 | Enah     | ENSMUSG00000022995  | 0.945605411 |
| 794 | Cenpl    | ENSMUSG00000026708  | 0.945413278 |
| 795 | Mllt3    | ENSMUSG00000028496  | 0.944147681 |

|     |               |                    |             |
|-----|---------------|--------------------|-------------|
| 796 | Gm38253       | ENSMUSG00000102780 | 0.943228673 |
| 797 | Dram1         | ENSMUSG00000020057 | 0.942235891 |
| 798 | Fkbp2         | ENSMUSG00000056629 | 0.939827021 |
| 799 | Gm28229       | ENSMUSG00000101335 | 0.939355326 |
| 800 | Lair1         | ENSMUSG00000055541 | 0.938493164 |
| 801 | Mapkapk2      | ENSMUSG00000016528 | 0.936458386 |
| 802 | Pcgf6         | ENSMUSG00000025050 | 0.935665477 |
| 803 | Zfp367        | ENSMUSG00000044934 | 0.934484588 |
| 804 | Tm2d2         | ENSMUSG00000031556 | 0.933364167 |
| 805 | Sec11a        | ENSMUSG00000025724 | 0.930747552 |
| 806 | Kif5b         | ENSMUSG00000006740 | 0.930384309 |
| 807 | Clvs1         | ENSMUSG00000041216 | 0.929682573 |
| 808 | 5430416N02Rik | ENSMUSG00000097772 | 0.927749382 |
| 809 | Gpx4          | ENSMUSG00000075706 | 0.926359853 |
| 810 | Mroh1         | ENSMUSG00000022558 | 0.926118233 |
| 811 | Klf6          | ENSMUSG00000000078 | 0.92183922  |
| 812 | Cenpc1        | ENSMUSG00000029253 | 0.921501563 |
| 813 | Nfkb2         | ENSMUSG00000025225 | 0.920852777 |
| 814 | Rnf19b        | ENSMUSG00000028793 | 0.920537936 |
| 815 | Osmr          | ENSMUSG00000022146 | 0.918933908 |
| 816 | Pus7          | ENSMUSG00000057541 | 0.917310055 |
| 817 | Sarnp         | ENSMUSG00000078427 | 0.916958299 |
| 818 | Mt1           | ENSMUSG00000031765 | 0.916867703 |
| 819 | Enho          | ENSMUSG00000028445 | 0.91608576  |
| 820 | Grn           | ENSMUSG00000034708 | 0.915517395 |
| 821 | Rasl11b       | ENSMUSG00000049907 | 0.913181622 |
| 822 | Fkbp11        | ENSMUSG00000003355 | 0.913036698 |
| 823 | Plau          | ENSMUSG00000021822 | 0.912940093 |
| 824 | Lipa          | ENSMUSG00000024781 | 0.910771572 |
| 825 | Gm5560        | ENSMUSG00000067161 | 0.91077063  |
| 826 | Zfp948        | ENSMUSG00000067931 | 0.909510608 |
| 827 | Sac3d1        | ENSMUSG00000024790 | 0.909267499 |
| 828 | Jpt1          | ENSMUSG00000020737 | 0.909190468 |
| 829 | Apex1         | ENSMUSG00000035960 | 0.908491689 |
| 830 | Trmt6         | ENSMUSG00000037376 | 0.907990576 |
| 831 | Rheb          | ENSMUSG00000028945 | 0.907606311 |
| 832 | Fam198b       | ENSMUSG00000027955 | 0.907554858 |
| 833 | Bax           | ENSMUSG00000003873 | 0.907449126 |
| 834 | Rpn1          | ENSMUSG00000030062 | 0.906935746 |
| 835 | Gm11478       | ENSMUSG00000083992 | 0.905994986 |
| 836 | Zdhhc9        | ENSMUSG00000036985 | 0.905808959 |
| 837 | Slc38a4       | ENSMUSG00000022464 | 0.904812847 |
| 838 | Gm26672       | ENSMUSG00000097330 | 0.902397251 |
| 839 | Rcl1          | ENSMUSG00000024785 | 0.901908816 |
| 840 | Tpp2          | ENSMUSG00000041763 | 0.901477192 |
| 841 | Snhg6         | ENSMUSG00000098234 | 0.899789841 |
| 842 | Lgi2          | ENSMUSG00000039252 | 0.897646502 |

|     |            |                    |             |
|-----|------------|--------------------|-------------|
| 843 | Zfp462     | ENSMUSG00000060206 | 0.896480563 |
| 844 | Lrif1      | ENSMUSG00000056260 | 0.895298737 |
| 845 | Kif11      | ENSMUSG00000012443 | 0.892626767 |
| 846 | Thsd4      | ENSMUSG00000032289 | 0.892486283 |
| 847 | Rragd      | ENSMUSG00000028278 | 0.889950586 |
| 848 | Ccdc86     | ENSMUSG00000024732 | 0.889519185 |
| 849 | Usp53      | ENSMUSG00000039701 | 0.889057897 |
| 850 | Mob3a      | ENSMUSG00000003348 | 0.888369885 |
| 851 | Zfas1      | ENSMUSG00000074578 | 0.887650048 |
| 852 | Nop58      | ENSMUSG00000026020 | 0.887388208 |
| 853 | Gm6223     | ENSMUSG00000096647 | 0.887365225 |
| 854 | Gfod1      | ENSMUSG00000051335 | 0.887152785 |
| 855 | Tmem97     | ENSMUSG00000037278 | 0.886737284 |
| 856 | Jun        | ENSMUSG00000052684 | 0.886098371 |
| 857 | Ncs1       | ENSMUSG00000062661 | 0.885836675 |
| 858 | Csf2ra     | ENSMUSG00000059326 | 0.884172744 |
| 859 | Ltv1       | ENSMUSG00000019814 | 0.884018053 |
| 860 | Sh3pxd2b   | ENSMUSG00000040711 | 0.880479476 |
| 861 | Tob1       | ENSMUSG00000037573 | 0.880452628 |
| 862 | Man1a      | ENSMUSG00000003746 | 0.880287851 |
| 863 | Dusp10     | ENSMUSG00000039384 | 0.879694355 |
| 864 | Gm45457    | ENSMUSG00000110411 | 0.878622714 |
| 865 | Tprn       | ENSMUSG00000048707 | 0.876324704 |
| 866 | March3     | ENSMUSG00000032656 | 0.876120534 |
| 867 | Hist1h1c   | ENSMUSG00000036181 | 0.872327463 |
| 868 | Rpl36a-ps3 | ENSMUSG00000071141 | 0.871135433 |
| 869 | Trabd      | ENSMUSG00000015363 | 0.870610656 |
| 870 | Gm12295    | ENSMUSG00000085162 | 0.870583756 |
| 871 | Cstf3      | ENSMUSG00000027176 | 0.870545915 |
| 872 | Prkaca     | ENSMUSG00000005469 | 0.870147833 |
| 873 | BC031181   | ENSMUSG00000036299 | 0.870006603 |
| 874 | Yrdc       | ENSMUSG00000028889 | 0.869735199 |
| 875 | Mtmr4      | ENSMUSG00000018401 | 0.866029558 |
| 876 | Hsd17b12   | ENSMUSG00000027195 | 0.86408055  |
| 877 | Snrnp25    | ENSMUSG00000040767 | 0.86236488  |
| 878 | Slc35b1    | ENSMUSG00000020873 | 0.862043131 |
| 879 | Uxs1       | ENSMUSG00000057363 | 0.861861965 |
| 880 | Rhoc       | ENSMUSG00000002233 | 0.861369588 |
| 881 | Atp8b2     | ENSMUSG00000060671 | 0.859678124 |
| 882 | Relb       | ENSMUSG00000002983 | 0.859378177 |
| 883 | Arhgap19   | ENSMUSG00000025154 | 0.859244571 |
| 884 | Klhl21     | ENSMUSG00000073700 | 0.858928128 |
| 885 | Ier5       | ENSMUSG00000056708 | 0.858885901 |
| 886 | Slc35e4    | ENSMUSG00000048807 | 0.858665598 |
| 887 | Ifi205     | ENSMUSG00000054203 | 0.856980021 |
| 888 | Igtp       | ENSMUSG00000078853 | 0.855072616 |
| 889 | Fam96b     | ENSMUSG00000031879 | 0.854406453 |



|     |           |                    |             |
|-----|-----------|--------------------|-------------|
| 890 | Arpc3     | ENSMUSG00000029465 | 0.854351924 |
| 891 | Clock     | ENSMUSG00000029238 | 0.853340465 |
| 892 | Grwd1     | ENSMUSG00000053801 | 0.852420254 |
| 893 | Tuba1a    | ENSMUSG00000072235 | 0.851395906 |
| 894 | Mtbp      | ENSMUSG00000022369 | 0.847799005 |
| 895 | Baz1a     | ENSMUSG00000035021 | 0.847175088 |
| 896 | Tlr4      | ENSMUSG00000039005 | 0.846219844 |
| 897 | Hsp25-ps1 | ENSMUSG00000078915 | 0.845951106 |
| 898 | Gm45220   | ENSMUSG00000109279 | 0.844793295 |
| 899 | Abca4     | ENSMUSG00000028125 | 0.84421429  |
| 900 | Lrrc3b    | ENSMUSG00000045201 | 0.844018318 |
| 901 | Hnrnpa3   | ENSMUSG00000059005 | 0.842870906 |
| 902 | Tsr1      | ENSMUSG00000038335 | 0.842141274 |
| 903 | Rhod      | ENSMUSG00000041845 | 0.840435869 |
| 904 | Creld1    | ENSMUSG00000030284 | 0.840289076 |
| 905 | Dda1      | ENSMUSG00000074247 | 0.839225255 |
| 906 | Vwa5a     | ENSMUSG00000023186 | 0.838955985 |
| 907 | Abi3bp    | ENSMUSG00000035258 | 0.838946299 |
| 908 | Prmt3     | ENSMUSG00000030505 | 0.838927104 |
| 909 | Zfp322a   | ENSMUSG00000046351 | 0.836133767 |
| 910 | Fam46a    | ENSMUSG00000032265 | 0.836070746 |
| 911 | Stmn1     | ENSMUSG00000028832 | 0.835738151 |
| 912 | Mis12     | ENSMUSG00000040599 | 0.835615698 |
| 913 | Oat       | ENSMUSG00000030934 | 0.834136647 |
| 914 | Med19     | ENSMUSG00000027080 | 0.833175877 |
| 915 | Pla2g4a   | ENSMUSG00000056220 | 0.83298215  |
| 916 | Dzip3     | ENSMUSG00000064061 | 0.83208629  |
| 917 | Gda       | ENSMUSG00000058624 | 0.831307598 |
| 918 | Tcea1-ps1 | ENSMUSG00000067869 | 0.830474395 |
| 919 | Rbmx2     | ENSMUSG00000031107 | 0.830185857 |
| 920 | Gas5      | ENSMUSG00000053332 | 0.830002317 |
| 921 | Tlnrd1    | ENSMUSG00000070462 | 0.829861228 |
| 922 | Ipo5      | ENSMUSG00000030662 | 0.8274388   |
| 923 | Golim4    | ENSMUSG00000034109 | 0.826919132 |
| 924 | Zbtb40    | ENSMUSG00000060862 | 0.825764322 |
| 925 | Gcsh      | ENSMUSG00000034424 | 0.825080405 |
| 926 | Nubp1     | ENSMUSG00000022503 | 0.823716909 |
| 927 | Adgrd1    | ENSMUSG00000044017 | 0.823705721 |
| 928 | Eif4a-ps4 | ENSMUSG00000101188 | 0.822285582 |
| 929 | Tgfbr1    | ENSMUSG00000007613 | 0.819006418 |
| 930 | Sec23a    | ENSMUSG00000020986 | 0.818675812 |
| 931 | Katnb1    | ENSMUSG00000031787 | 0.815531235 |
| 932 | Ascc3     | ENSMUSG00000038774 | 0.815042677 |
| 933 | Creb3l2   | ENSMUSG00000038648 | 0.81439726  |
| 934 | Amer1     | ENSMUSG00000050332 | 0.812900011 |
| 935 | Gtf2f2    | ENSMUSG00000067995 | 0.812866099 |
| 936 | Psmid14   | ENSMUSG00000026914 | 0.811361474 |



|     |           |                    |             |
|-----|-----------|--------------------|-------------|
| 937 | Tcea1     | ENSMUSG00000033813 | 0.810968429 |
| 938 | Fads3     | ENSMUSG00000024664 | 0.809540069 |
| 939 | Spata13   | ENSMUSG00000021990 | 0.808825986 |
| 940 | Fcgr2b    | ENSMUSG00000026656 | 0.808137326 |
| 941 | Gm12258   | ENSMUSG00000072915 | 0.80795738  |
| 942 | Fxyd5     | ENSMUSG00000009687 | 0.807277415 |
| 943 | Tyropb    | ENSMUSG00000030579 | 0.807110129 |
| 944 | Selenoi   | ENSMUSG00000075703 | 0.805764874 |
| 945 | Tnfrsf11a | ENSMUSG00000026321 | 0.805378296 |
| 946 | Surf4     | ENSMUSG00000014867 | 0.805330078 |
| 947 | Ahnak2    | ENSMUSG00000072812 | 0.80520946  |
| 948 | Xpot      | ENSMUSG00000034667 | 0.805192336 |
| 949 | Rpl13a    | ENSMUSG00000074129 | 0.804787789 |
| 950 | Ankrd49   | ENSMUSG00000031931 | 0.804318284 |
| 951 | Lmnb2     | ENSMUSG00000062075 | 0.804229027 |
| 952 | Tmem183a  | ENSMUSG00000042305 | 0.80371481  |
| 953 | Ifi204    | ENSMUSG00000073489 | 0.803687915 |
| 954 | Mydgf     | ENSMUSG00000019579 | 0.803441204 |
| 955 | Pja2      | ENSMUSG00000024083 | 0.802786062 |
| 956 | Erbp2     | ENSMUSG00000062312 | 0.802684133 |
| 957 | Nckap1l   | ENSMUSG00000022488 | 0.801160539 |
| 958 | Eef1a1    | ENSMUSG00000037742 | 0.79904953  |
| 959 | Popdc3    | ENSMUSG00000019848 | 0.797193966 |
| 960 | Rps19bp1  | ENSMUSG00000051518 | 0.796956637 |
| 961 | Galns     | ENSMUSG00000015027 | 0.79645697  |
| 962 | Actr3     | ENSMUSG00000026341 | 0.795827554 |
| 963 | Gpx3      | ENSMUSG00000018339 | 0.795421727 |
| 964 | Pinx1     | ENSMUSG00000021958 | 0.794583212 |
| 965 | Emd       | ENSMUSG00000001964 | 0.794213198 |
| 966 | Dap       | ENSMUSG00000039168 | 0.793663404 |
| 967 | Fryl      | ENSMUSG00000070733 | 0.793585949 |
| 968 | Gm12844   | ENSMUSG00000084260 | 0.792949051 |
| 969 | Cenpx     | ENSMUSG00000025144 | 0.792844995 |
| 970 | Alg8      | ENSMUSG00000035704 | 0.792373737 |
| 971 | Nars      | ENSMUSG00000024587 | 0.79112078  |
| 972 | Klf7      | ENSMUSG00000025959 | 0.790947492 |
| 973 | Ddx31     | ENSMUSG00000026806 | 0.790395442 |
| 974 | Mogs      | ENSMUSG00000030036 | 0.788864385 |
| 975 | Med10     | ENSMUSG00000021598 | 0.788246323 |
| 976 | Ifrd1     | ENSMUSG00000001627 | 0.7880196   |
| 977 | Rrp15     | ENSMUSG00000001305 | 0.786998678 |
| 978 | Extl1     | ENSMUSG00000028838 | 0.786757054 |
| 979 | Prr13     | ENSMUSG00000023048 | 0.786660343 |
| 980 | Gpn2      | ENSMUSG00000028848 | 0.786223513 |
| 981 | Mvk       | ENSMUSG00000041939 | 0.785041015 |
| 982 | Casp3     | ENSMUSG00000031628 | 0.783183801 |
| 983 | Ddx50     | ENSMUSG00000020076 | 0.783123916 |

|      |               |                    |             |
|------|---------------|--------------------|-------------|
| 984  | Usp39         | ENSMUSG00000056305 | 0.782950199 |
| 985  | Wdr4          | ENSMUSG00000024037 | 0.782833194 |
| 986  | Gpn1          | ENSMUSG00000064037 | 0.782525316 |
| 987  | Ppm1b         | ENSMUSG00000061130 | 0.781952441 |
| 988  | Snd1          | ENSMUSG00000001424 | 0.781466948 |
| 989  | lkbkg         | ENSMUSG00000004221 | 0.781330934 |
| 990  | Dynll1        | ENSMUSG00000009013 | 0.780116711 |
| 991  | Arpc4         | ENSMUSG00000079426 | 0.779585176 |
| 992  | Ccdc115       | ENSMUSG00000042111 | 0.779252872 |
| 993  | Eif4a1        | ENSMUSG00000059796 | 0.778100092 |
| 994  | Ftsj3         | ENSMUSG00000020706 | 0.777306748 |
| 995  | Fbxw9         | ENSMUSG00000008167 | 0.777211512 |
| 996  | Leo1          | ENSMUSG00000042487 | 0.776732527 |
| 997  | Rhoa          | ENSMUSG00000007815 | 0.776493294 |
| 998  | Gm12112       | ENSMUSG00000081254 | 0.77566347  |
| 999  | Bahcc1        | ENSMUSG00000039741 | 0.775052378 |
| 1000 | Pum3          | ENSMUSG00000041360 | 0.774948414 |
| 1001 | Gm45221       | ENSMUSG00000109005 | 0.774602671 |
| 1002 | Lyz2          | ENSMUSG00000069516 | 0.774524955 |
| 1003 | 1600002K03Rik | ENSMUSG00000035595 | 0.774418722 |
| 1004 | Fkbp7         | ENSMUSG00000002732 | 0.773717985 |
| 1005 | Fn1           | ENSMUSG00000026193 | 0.773362062 |
| 1006 | Sap30l        | ENSMUSG00000020519 | 0.773262893 |
| 1007 | Tes           | ENSMUSG00000029552 | 0.772626119 |
| 1008 | Slc39a6       | ENSMUSG00000024270 | 0.771398846 |
| 1009 | Zc2hc1a       | ENSMUSG00000043542 | 0.771017675 |
| 1010 | Thyn1         | ENSMUSG00000035443 | 0.770797183 |
| 1011 | Ddah1         | ENSMUSG00000028194 | 0.769961103 |
| 1012 | Ccng1         | ENSMUSG00000020326 | 0.769197013 |
| 1013 | Sgms2         | ENSMUSG00000050931 | 0.768717188 |
| 1014 | Taf7          | ENSMUSG00000051316 | 0.768132124 |
| 1015 | Adprhl1       | ENSMUSG00000031448 | 0.767639577 |
| 1016 | Wdpcp         | ENSMUSG00000020319 | 0.766627398 |
| 1017 | Utp18         | ENSMUSG00000054079 | 0.765916084 |
| 1018 | Aen           | ENSMUSG00000030609 | 0.765640168 |
| 1019 | Fosl2         | ENSMUSG00000029135 | 0.76503642  |
| 1020 | Eprs          | ENSMUSG00000026615 | 0.76403217  |
| 1021 | Spcs3         | ENSMUSG00000054408 | 0.763733035 |
| 1022 | Zfp202        | ENSMUSG00000025602 | 0.763239857 |
| 1023 | Ddx21         | ENSMUSG00000020075 | 0.761090656 |
| 1024 | Ifit3b        | ENSMUSG00000062488 | 0.760911452 |
| 1025 | Itga3         | ENSMUSG00000001507 | 0.760586711 |
| 1026 | Sec61b        | ENSMUSG00000053317 | 0.760554414 |
| 1027 | Acot9         | ENSMUSG00000025287 | 0.760485931 |
| 1028 | Rap2a         | ENSMUSG00000051615 | 0.760193646 |
| 1029 | Plxna1        | ENSMUSG00000030084 | 0.760040367 |
| 1030 | Col3a1        | ENSMUSG00000026043 | 0.759873146 |

|      |               |                    |             |
|------|---------------|--------------------|-------------|
| 1031 | Litaf         | ENSMUSG00000022500 | 0.757875884 |
| 1032 | Ugdh          | ENSMUSG00000029201 | 0.75650923  |
| 1033 | Slc25a5       | ENSMUSG00000016319 | 0.755661677 |
| 1034 | Taf4b         | ENSMUSG00000054321 | 0.755349399 |
| 1035 | Atp6v1h       | ENSMUSG00000033793 | 0.755164921 |
| 1036 | Pprc1         | ENSMUSG00000055491 | 0.754992697 |
| 1037 | Ero1b         | ENSMUSG00000057069 | 0.754878836 |
| 1038 | Atp13a3       | ENSMUSG00000022533 | 0.754297559 |
| 1039 | Scara3        | ENSMUSG00000034463 | 0.753649119 |
| 1040 | Rab20         | ENSMUSG00000031504 | 0.753365513 |
| 1041 | Pfcp          | ENSMUSG00000021196 | 0.750610364 |
| 1042 | Fam185a       | ENSMUSG00000047221 | 0.750106396 |
| 1043 | Snhg12        | ENSMUSG00000086290 | 0.749717222 |
| 1044 | Cib1          | ENSMUSG00000030538 | 0.74771931  |
| 1045 | Bola2         | ENSMUSG00000047721 | 0.746320287 |
| 1046 | Selenos       | ENSMUSG00000075701 | 0.745582972 |
| 1047 | Cbx6          | ENSMUSG00000089715 | 0.745101247 |
| 1048 | Wars          | ENSMUSG00000021266 | 0.743841568 |
| 1049 | Cacna1h       | ENSMUSG00000024112 | 0.742510804 |
| 1050 | Arhgef10l     | ENSMUSG00000040964 | 0.741971201 |
| 1051 | Zwint         | ENSMUSG00000019923 | 0.740927247 |
| 1052 | Ywhaz         | ENSMUSG00000022285 | 0.739821073 |
| 1053 | Hsph1         | ENSMUSG00000029657 | 0.739234336 |
| 1054 | Lars          | ENSMUSG00000024493 | 0.738810973 |
| 1055 | Amn1          | ENSMUSG00000068250 | 0.73819553  |
| 1056 | Dapk3         | ENSMUSG00000034974 | 0.735756947 |
| 1057 | Rars          | ENSMUSG00000018848 | 0.735425061 |
| 1058 | Sap130        | ENSMUSG00000024260 | 0.735274982 |
| 1059 | Clptm1l       | ENSMUSG00000021610 | 0.735101427 |
| 1060 | Fbl           | ENSMUSG00000046865 | 0.732474301 |
| 1061 | Itpk1         | ENSMUSG00000057963 | 0.732267051 |
| 1062 | Sema3a        | ENSMUSG00000028883 | 0.732207001 |
| 1063 | Mon1b         | ENSMUSG00000078908 | 0.732016876 |
| 1064 | Shoc2         | ENSMUSG00000024976 | 0.731088633 |
| 1065 | Hist1h3e      | ENSMUSG00000069273 | 0.731064742 |
| 1066 | Fem1b         | ENSMUSG00000032244 | 0.731036087 |
| 1067 | Urb2          | ENSMUSG00000031976 | 0.730985248 |
| 1068 | Actn1         | ENSMUSG00000015143 | 0.729523694 |
| 1069 | Tmem167       | ENSMUSG00000012422 | 0.728202541 |
| 1070 | Utp20         | ENSMUSG00000004356 | 0.727887583 |
| 1071 | Acsl3         | ENSMUSG00000032883 | 0.726157803 |
| 1072 | Hipk2         | ENSMUSG00000061436 | 0.726075305 |
| 1073 | Hfe           | ENSMUSG00000006611 | 0.725174423 |
| 1074 | Wdr75         | ENSMUSG00000025995 | 0.725124244 |
| 1075 | 2310022B05Rik | ENSMUSG00000031983 | 0.724824673 |
| 1076 | Smg1          | ENSMUSG00000030655 | 0.724789024 |
| 1077 | Rps26         | ENSMUSG00000025362 | 0.723623341 |

|      |          |                    |             |
|------|----------|--------------------|-------------|
| 1078 | Pfn1     | ENSMUSG00000018293 | 0.723399628 |
| 1079 | Nup88    | ENSMUSG00000040667 | 0.721541853 |
| 1080 | Spata24  | ENSMUSG00000024352 | 0.72114141  |
| 1081 | P2ry2    | ENSMUSG00000032860 | 0.720427675 |
| 1082 | Cav3     | ENSMUSG00000062694 | 0.719875911 |
| 1083 | Cfl1     | ENSMUSG00000056201 | 0.719785535 |
| 1084 | Herc4    | ENSMUSG00000020064 | 0.719381863 |
| 1085 | Selenof  | ENSMUSG00000037072 | 0.719245944 |
| 1086 | Cxcl16   | ENSMUSG00000018920 | 0.717932582 |
| 1087 | Gm10110  | ENSMUSG00000062093 | 0.716952245 |
| 1088 | Cyb5r3   | ENSMUSG00000018042 | 0.716716913 |
| 1089 | Slc3a2   | ENSMUSG00000010095 | 0.716602287 |
| 1090 | Noc3l    | ENSMUSG00000024999 | 0.716426765 |
| 1091 | Ddx54    | ENSMUSG00000029599 | 0.715670612 |
| 1092 | Mcrs1    | ENSMUSG00000037570 | 0.714953137 |
| 1093 | Igf1r    | ENSMUSG00000005533 | 0.714498197 |
| 1094 | Prkcd    | ENSMUSG00000021948 | 0.7128372   |
| 1095 | Fam49b   | ENSMUSG00000022378 | 0.712197402 |
| 1096 | Nop2     | ENSMUSG00000038279 | 0.710666914 |
| 1097 | Ttc9c    | ENSMUSG00000071660 | 0.707842691 |
| 1098 | Zfp954   | ENSMUSG00000062116 | 0.707420379 |
| 1099 | Zfpm1    | ENSMUSG00000049577 | 0.706576066 |
| 1100 | Pgs1     | ENSMUSG00000017715 | 0.706202908 |
| 1101 | Tspyl5   | ENSMUSG00000038984 | 0.705293119 |
| 1102 | Mpp7     | ENSMUSG00000057440 | 0.704277435 |
| 1103 | Tnfrsf1a | ENSMUSG00000030341 | 0.704189614 |
| 1104 | Otulin   | ENSMUSG00000046034 | 0.704115093 |
| 1105 | Kank1    | ENSMUSG00000032702 | 0.702975445 |
| 1106 | Rpsa     | ENSMUSG00000032518 | 0.702748438 |
| 1107 | Rcc2     | ENSMUSG00000040945 | 0.702261881 |
| 1108 | Srxn1    | ENSMUSG00000032802 | 0.701460756 |
| 1109 | Slc2a1   | ENSMUSG00000028645 | 0.700955335 |
| 1110 | Cct3     | ENSMUSG00000001416 | 0.69967866  |
| 1111 | Mad2l1   | ENSMUSG00000029910 | 0.69840823  |
| 1112 | Asna1    | ENSMUSG00000052456 | 0.698282921 |
| 1113 | Ckb      | ENSMUSG00000001270 | 0.698075616 |
| 1114 | Nifk     | ENSMUSG00000026377 | 0.697968583 |
| 1115 | Lmo4     | ENSMUSG00000028266 | 0.697798413 |
| 1116 | Rrp7a    | ENSMUSG00000018040 | 0.69721061  |
| 1117 | Rps15a   | ENSMUSG00000008683 | 0.695995515 |
| 1118 | Nsd2     | ENSMUSG00000057406 | 0.695643756 |
| 1119 | Nup43    | ENSMUSG00000040034 | 0.695320906 |
| 1120 | G2e3     | ENSMUSG00000035293 | 0.694936906 |
| 1121 | Ifi27    | ENSMUSG00000064215 | 0.694884649 |
| 1122 | Gas7     | ENSMUSG00000033066 | 0.694061823 |
| 1123 | Sertad1  | ENSMUSG00000008384 | 0.692249697 |
| 1124 | Vcam1    | ENSMUSG00000027962 | 0.691728936 |

|      |               |                    |             |
|------|---------------|--------------------|-------------|
| 1125 | Ralb          | ENSMUSG00000004451 | 0.69153584  |
| 1126 | Igsf10        | ENSMUSG00000036334 | 0.691271506 |
| 1127 | Gm10073       | ENSMUSG00000060019 | 0.68938212  |
| 1128 | Stam          | ENSMUSG00000026718 | 0.689018094 |
| 1129 | Maged1        | ENSMUSG00000025151 | 0.68891575  |
| 1130 | Plpp1         | ENSMUSG00000021759 | 0.688901161 |
| 1131 | Gan           | ENSMUSG00000052557 | 0.686545609 |
| 1132 | Synpo2l       | ENSMUSG00000039376 | 0.686398231 |
| 1133 | Htt           | ENSMUSG00000029104 | 0.686383182 |
| 1134 | Gem           | ENSMUSG00000028214 | 0.686188335 |
| 1135 | Pvr           | ENSMUSG00000040511 | 0.685411045 |
| 1136 | Lins1         | ENSMUSG00000053091 | 0.683541269 |
| 1137 | Cyb561        | ENSMUSG00000019590 | 0.683530223 |
| 1138 | Heatr5b       | ENSMUSG00000039414 | 0.683422176 |
| 1139 | Pabpc4        | ENSMUSG00000011257 | 0.682692924 |
| 1140 | Fam111a       | ENSMUSG00000024691 | 0.682321473 |
| 1141 | Nudt4         | ENSMUSG00000020029 | 0.681346251 |
| 1142 | Ercc8         | ENSMUSG00000021694 | 0.681173255 |
| 1143 | Tspan31       | ENSMUSG00000006736 | 0.680937093 |
| 1144 | Sema3c        | ENSMUSG00000028780 | 0.680773986 |
| 1145 | Slc25a28      | ENSMUSG00000040414 | 0.680093591 |
| 1146 | Zbtb7b        | ENSMUSG00000028042 | 0.679923023 |
| 1147 | 9130011E15Rik | ENSMUSG00000039901 | 0.678730954 |
| 1148 | Anxa6         | ENSMUSG00000018340 | 0.677924858 |
| 1149 | Csnk1g1       | ENSMUSG00000032384 | 0.67790772  |
| 1150 | Aste1         | ENSMUSG00000032567 | 0.677790507 |
| 1151 | Mx2           | ENSMUSG00000023341 | 0.677562512 |
| 1152 | Ago2          | ENSMUSG00000036698 | 0.677518908 |
| 1153 | Gm8355        | ENSMUSG00000093798 | 0.676679781 |
| 1154 | Polr2h        | ENSMUSG00000021018 | 0.67613414  |
| 1155 | B4galt1       | ENSMUSG00000028413 | 0.676056464 |
| 1156 | Col27a1       | ENSMUSG00000045672 | 0.67596004  |
| 1157 | Dysf          | ENSMUSG00000033788 | 0.675477748 |
| 1158 | Ebna1bp2      | ENSMUSG00000028729 | 0.675301472 |
| 1159 | Snrpa         | ENSMUSG00000061479 | 0.675264485 |
| 1160 | Sacm1l        | ENSMUSG00000025240 | 0.674974673 |
| 1161 | Sept11        | ENSMUSG00000058013 | 0.674586578 |
| 1162 | Nip7          | ENSMUSG00000031917 | 0.67427054  |
| 1163 | Zfp35         | ENSMUSG00000063281 | 0.673101415 |
| 1164 | Rpsa-ps10     | ENSMUSG00000047676 | 0.67298466  |
| 1165 | Rbm19         | ENSMUSG00000029594 | 0.671834375 |
| 1166 | Papss1        | ENSMUSG00000028032 | 0.670756067 |
| 1167 | Gm15710       | ENSMUSG00000084111 | 0.669958309 |
| 1168 | Atp10a        | ENSMUSG00000025324 | 0.66964081  |
| 1169 | Eif2s2        | ENSMUSG00000074656 | 0.669289656 |
| 1170 | Rhobtb3       | ENSMUSG00000021589 | 0.669280554 |
| 1171 | Ifit1         | ENSMUSG00000034459 | 0.669162863 |

|      |           |                    |             |
|------|-----------|--------------------|-------------|
| 1172 | Rps27l    | ENSMUSG00000036781 | 0.668752047 |
| 1173 | Mex3c     | ENSMUSG00000037253 | 0.668191088 |
| 1174 | Rangap1   | ENSMUSG00000022391 | 0.667900592 |
| 1175 | Tmtc3     | ENSMUSG00000036676 | 0.667784074 |
| 1176 | Sptssa    | ENSMUSG00000044408 | 0.666057059 |
| 1177 | Rpl36al   | ENSMUSG00000049751 | 0.665684482 |
| 1178 | Utp14a    | ENSMUSG00000063785 | 0.663737961 |
| 1179 | Slc35b4   | ENSMUSG00000018999 | 0.663657564 |
| 1180 | Nt5e      | ENSMUSG00000032420 | 0.662443118 |
| 1181 | Alg14     | ENSMUSG00000039887 | 0.662411485 |
| 1182 | Bak1      | ENSMUSG00000057789 | 0.66107869  |
| 1183 | Sulf2     | ENSMUSG00000006800 | 0.660960059 |
| 1184 | Plekho2   | ENSMUSG00000050721 | 0.660295218 |
| 1185 | Clic4     | ENSMUSG00000037242 | 0.660096493 |
| 1186 | Gmds      | ENSMUSG00000038372 | 0.659058531 |
| 1187 | Dennd4a   | ENSMUSG00000053641 | 0.658649715 |
| 1188 | D1Ert622e | ENSMUSG00000044768 | 0.657605772 |
| 1189 | Nuak1     | ENSMUSG00000020032 | 0.657568401 |
| 1190 | Gm9892    | ENSMUSG00000052825 | 0.657255832 |
| 1191 | Gys1      | ENSMUSG00000003865 | 0.655983247 |
| 1192 | Dnaaf5    | ENSMUSG00000025857 | 0.654063659 |
| 1193 | Rps19-ps6 | ENSMUSG00000096942 | 0.654044111 |
| 1194 | Aimp2     | ENSMUSG00000029610 | 0.652181821 |
| 1195 | Ranbp1    | ENSMUSG00000005732 | 0.651469332 |
| 1196 | Akirin1   | ENSMUSG00000023075 | 0.651233528 |
| 1197 | Magt1     | ENSMUSG00000031232 | 0.651042114 |
| 1198 | Tmem8b    | ENSMUSG00000078716 | 0.650505945 |
| 1199 | Cnot1     | ENSMUSG00000036550 | 0.649904527 |
| 1200 | Lrrfip1   | ENSMUSG00000026305 | 0.648583949 |
| 1201 | Dlgap4    | ENSMUSG00000061689 | 0.647999278 |
| 1202 | Cttn      | ENSMUSG00000031078 | 0.647377419 |
| 1203 | Csrp1     | ENSMUSG00000026421 | 0.646229032 |
| 1204 |           | ENSMUSG00000109908 | 0.646091023 |
| 1205 | Calm1     | ENSMUSG00000001175 | 0.645126522 |
| 1206 | Btg1      | ENSMUSG00000036478 | 0.645011658 |
| 1207 | Thumpd3   | ENSMUSG00000030264 | 0.643791002 |
| 1208 | Eif6      | ENSMUSG00000027613 | 0.643730306 |
| 1209 | Alg12     | ENSMUSG00000035845 | 0.64288158  |
| 1210 | Preli1    | ENSMUSG00000021486 | 0.642585588 |
| 1211 | Sft2d1    | ENSMUSG00000073468 | 0.642332084 |
| 1212 | Gtf2f1    | ENSMUSG00000002658 | 0.641609494 |
| 1213 | Arhgdia   | ENSMUSG00000025132 | 0.641402122 |
| 1214 | Lpp       | ENSMUSG00000033306 | 0.641290026 |
| 1215 | Herc2     | ENSMUSG00000030451 | 0.641123786 |
| 1216 | Ssr4      | ENSMUSG00000002014 | 0.64044671  |
| 1217 | Sec11c    | ENSMUSG00000024516 | 0.639828566 |
| 1218 | Osbpl9    | ENSMUSG00000028559 | 0.639498317 |



|      |               |                    |             |
|------|---------------|--------------------|-------------|
| 1219 | Net1          | ENSMUSG00000021215 | 0.637143851 |
| 1220 | Smc2          | ENSMUSG00000028312 | 0.634767001 |
| 1221 | Gm4202        | ENSMUSG00000091421 | 0.634523293 |
| 1222 | Cyp51         | ENSMUSG00000001467 | 0.63435002  |
| 1223 | Col6a3        | ENSMUSG00000048126 | 0.633595473 |
| 1224 | Pign          | ENSMUSG00000056536 | 0.63355999  |
| 1225 | Tuba1b        | ENSMUSG00000023004 | 0.63198989  |
| 1226 | Uso1          | ENSMUSG00000029407 | 0.63104944  |
| 1227 | Epn3          | ENSMUSG00000010080 | 0.630938757 |
| 1228 | Ppp2r1b       | ENSMUSG00000032058 | 0.630364598 |
| 1229 | Tmem43        | ENSMUSG00000030095 | 0.630081801 |
| 1230 | Nup98         | ENSMUSG00000063550 | 0.629392191 |
| 1231 | Lrrc28        | ENSMUSG00000030556 | 0.629353958 |
| 1232 | Cptp          | ENSMUSG00000029073 | 0.629064149 |
| 1233 | Map2k1        | ENSMUSG00000004936 | 0.628573741 |
| 1234 | Atp6ap2       | ENSMUSG00000031007 | 0.628390821 |
| 1235 | Cbwd1         | ENSMUSG00000024878 | 0.6280778   |
| 1236 | Sdad1         | ENSMUSG00000029415 | 0.627165797 |
| 1237 | Col1a1        | ENSMUSG00000001506 | 0.626620549 |
| 1238 | Exosc2        | ENSMUSG00000039356 | 0.625799426 |
| 1239 | Alkbh6        | ENSMUSG00000042831 | 0.624868934 |
| 1240 | Mtm1          | ENSMUSG00000031337 | 0.624794263 |
| 1241 | Tma16         | ENSMUSG00000025591 | 0.624759039 |
| 1242 | Git1          | ENSMUSG00000011877 | 0.623695541 |
| 1243 | Chchd6        | ENSMUSG00000030086 | 0.62330958  |
| 1244 | Ptpn2         | ENSMUSG00000024539 | 0.621793951 |
| 1245 | Noc4l         | ENSMUSG00000033294 | 0.621598922 |
| 1246 | Rnd3          | ENSMUSG00000017144 | 0.619969972 |
| 1247 | Rps26-ps1     | ENSMUSG00000059775 | 0.619435377 |
| 1248 | Hinfp         | ENSMUSG00000032119 | 0.618940271 |
| 1249 | Rnf4          | ENSMUSG00000029110 | 0.618481098 |
| 1250 | Gadd45a       | ENSMUSG00000036390 | 0.617931993 |
| 1251 | Cdc42se2      | ENSMUSG00000052298 | 0.61765282  |
| 1252 | Tusc2         | ENSMUSG00000010054 | 0.614390119 |
| 1253 | Nup205        | ENSMUSG00000038759 | 0.61390988  |
| 1254 | Hras          | ENSMUSG00000025499 | 0.613823609 |
| 1255 | H2afz         | ENSMUSG00000037894 | 0.613687268 |
| 1256 | Crls1         | ENSMUSG00000027357 | 0.613582286 |
| 1257 | 1810022K09Rik | ENSMUSG00000078784 | 0.61310472  |
| 1258 | Prdm4         | ENSMUSG00000035529 | 0.612345211 |
| 1259 | Utp23         | ENSMUSG00000022313 | 0.612224386 |
| 1260 | Abca7         | ENSMUSG00000035722 | 0.610961443 |
| 1261 | Slc43a2       | ENSMUSG00000038178 | 0.609567402 |
| 1262 | Arhgap1       | ENSMUSG00000027247 | 0.609348442 |
| 1263 | 1110065P20Rik | ENSMUSG00000078570 | 0.608295661 |
| 1264 | Mlec          | ENSMUSG00000048578 | 0.607575492 |
| 1265 | Ctgf          | ENSMUSG00000019997 | 0.607389662 |



|      |               |                     |             |
|------|---------------|---------------------|-------------|
| 1266 | Tubb5         | ENSMUSG00000001525  | 0.60692508  |
| 1267 | Fstl1         | ENSMUSG00000022816  | 0.606903738 |
| 1268 | Cript         | ENSMUSG00000024146  | 0.606393596 |
| 1269 | Cdkn2d        | ENSMUSG000000096472 | 0.606364933 |
| 1270 | Slc38a1       | ENSMUSG00000023169  | 0.606175017 |
| 1271 | Snrnp40       | ENSMUSG00000074088  | 0.606046247 |
| 1272 | Rpl37rt       | ENSMUSG00000072692  | 0.605870647 |
| 1273 | Ticam1        | ENSMUSG00000047123  | 0.605515294 |
| 1274 | Mknk1         | ENSMUSG00000028708  | 0.605372644 |
| 1275 | Zpr1          | ENSMUSG00000032078  | 0.605301172 |
| 1276 | Ptov1         | ENSMUSG00000038502  | 0.605065096 |
| 1277 | Borcs6        | ENSMUSG00000045176  | 0.603991584 |
| 1278 | Pwp2          | ENSMUSG00000032834  | 0.603470513 |
| 1279 | Cd302         | ENSMUSG00000060703  | 0.602227963 |
| 1280 | Col4a5        | ENSMUSG00000031274  | 0.601840054 |
| 1281 | Dcun1d3       | ENSMUSG00000048787  | 0.601495354 |
| 1282 | Tmem41b       | ENSMUSG00000047554  | 0.601304134 |
| 1283 | Ak6           | ENSMUSG00000078941  | 0.600480642 |
| 1284 | Abhd17c       | ENSMUSG00000038459  | 0.6004754   |
| 1285 | Adam9         | ENSMUSG00000031555  | 0.598811296 |
| 1286 | Tspan9        | ENSMUSG00000030352  | 0.597732982 |
| 1287 | Tmbim6        | ENSMUSG00000023010  | 0.597709731 |
| 1288 | Evi5l         | ENSMUSG00000011832  | 0.597197721 |
| 1289 | Mcm6          | ENSMUSG00000026355  | 0.596849969 |
| 1290 | Hspa8         | ENSMUSG00000015656  | 0.596785008 |
| 1291 | Myo9a         | ENSMUSG00000039585  | 0.595772587 |
| 1292 | Cdv3          | ENSMUSG00000032803  | 0.594391759 |
| 1293 | Rps5          | ENSMUSG00000012848  | 0.59352121  |
| 1294 | Gpr108        | ENSMUSG00000005823  | 0.592814952 |
| 1295 | Wsb1          | ENSMUSG00000017677  | 0.592735969 |
| 1296 | Rps19         | ENSMUSG00000040952  | 0.592580642 |
| 1297 | Hmg20b        | ENSMUSG00000020232  | 0.5917954   |
| 1298 | Flna          | ENSMUSG00000031328  | 0.590876496 |
| 1299 | Ccdc25        | ENSMUSG00000022035  | 0.588484211 |
| 1300 | Maea          | ENSMUSG00000079562  | 0.588459912 |
| 1301 | Ap3m1         | ENSMUSG00000021824  | 0.588426438 |
| 1302 | Leprot        | ENSMUSG00000035212  | 0.587584642 |
| 1303 | Rpl14         | ENSMUSG00000025794  | 0.587384075 |
| 1304 | Pbdc1         | ENSMUSG00000031226  | 0.587199446 |
| 1305 | Itm2c         | ENSMUSG00000026223  | 0.586300683 |
| 1306 | Klf2          | ENSMUSG00000055148  | 0.586213082 |
| 1307 | Yars          | ENSMUSG00000028811  | 0.585805997 |
| 1308 | Ctnnal1       | ENSMUSG00000038816  | 0.585104715 |
| 1309 | Anxa2         | ENSMUSG00000032231  | 0.584881521 |
| 1310 | Tomm70a       | ENSMUSG00000022752  | 0.584741477 |
| 1311 | Sdsl          | ENSMUSG00000029596  | 0.584574705 |
| 1312 | 9930021J03Rik | ENSMUSG00000046138  | 0.58445531  |

|      |               |                    |             |
|------|---------------|--------------------|-------------|
| 1313 | Tssc1         | ENSMUSG00000036613 | 0.583745402 |
| 1314 | Pde12         | ENSMUSG00000043702 | 0.582926616 |
| 1315 | Sbf1          | ENSMUSG00000036529 | 0.582653681 |
| 1316 | Fam174a       | ENSMUSG00000051185 | 0.582472213 |
| 1317 | Taldo1        | ENSMUSG00000025503 | 0.582320022 |
| 1318 | D930016D06Rik | ENSMUSG00000097392 | 0.581637646 |
| 1319 | Dcaf13        | ENSMUSG00000022300 | 0.581585018 |
| 1320 | Exoc1         | ENSMUSG00000036435 | 0.581250128 |
| 1321 | Ltbr          | ENSMUSG00000030339 | 0.581166184 |
| 1322 | Ppp2r5a       | ENSMUSG00000026626 | 0.581147697 |
| 1323 | Ttc37         | ENSMUSG00000033991 | 0.580241398 |
| 1324 | Ipo4          | ENSMUSG00000002319 | 0.580236941 |
| 1325 | Bag2          | ENSMUSG00000042215 | 0.579701437 |
| 1326 | Dse           | ENSMUSG00000039497 | 0.579658773 |
| 1327 | Rhbdd1        | ENSMUSG00000026142 | 0.578566976 |
| 1328 | Fam208b       | ENSMUSG00000033799 | 0.578445914 |
| 1329 | Rpl12         | ENSMUSG00000038900 | 0.575352258 |
| 1330 | Tmem208       | ENSMUSG00000014856 | 0.575008895 |
| 1331 | Cyb5b         | ENSMUSG00000031924 | 0.574780909 |
| 1332 | Trove2        | ENSMUSG00000018199 | 0.573184709 |
| 1333 | Ddx10         | ENSMUSG00000053289 | 0.573045385 |
| 1334 | Fat1          | ENSMUSG00000070047 | 0.572118107 |
| 1335 | Fbn1          | ENSMUSG00000027204 | 0.571995332 |
| 1336 | B3gat3        | ENSMUSG00000071649 | 0.571481092 |
| 1337 | Nlk           | ENSMUSG00000017376 | 0.57134959  |
| 1338 | Dnajc2        | ENSMUSG00000029014 | 0.571336165 |
| 1339 | Gm37084       | ENSMUSG00000102856 | 0.5710928   |
| 1340 | Pspc1         | ENSMUSG00000021938 | 0.57058026  |
| 1341 | Btaf1         | ENSMUSG00000040565 | 0.569496277 |
| 1342 | Loxl1         | ENSMUSG00000032334 | 0.568574626 |
| 1343 | Hand2         | ENSMUSG00000038193 | 0.568356416 |
| 1344 | Cfap36        | ENSMUSG00000020462 | 0.567957448 |
| 1345 | Emp2          | ENSMUSG00000022505 | 0.567116638 |
| 1346 | Tmem160       | ENSMUSG00000019158 | 0.566839725 |
| 1347 | Rala          | ENSMUSG00000008859 | 0.566565194 |
| 1348 | Gba           | ENSMUSG00000028048 | 0.566345276 |
| 1349 | Sec23b        | ENSMUSG00000027429 | 0.565988723 |
| 1350 | Bud31         | ENSMUSG00000038722 | 0.56464418  |
| 1351 | Pno1          | ENSMUSG00000020116 | 0.563941008 |
| 1352 | Gm15459       | ENSMUSG00000100801 | 0.562548494 |
| 1353 | Rpe           | ENSMUSG00000026005 | 0.56228236  |
| 1354 | Pdlim1        | ENSMUSG00000055044 | 0.562234977 |
| 1355 | Arih1         | ENSMUSG00000025234 | 0.561272177 |
| 1356 | Sf3b6         | ENSMUSG00000037361 | 0.561260446 |
| 1357 | L2hgdh        | ENSMUSG00000020988 | 0.561232297 |
| 1358 | Rps27a        | ENSMUSG00000020460 | 0.561222534 |
| 1359 | Mpp6          | ENSMUSG00000038388 | 0.560892157 |

|      |          |                     |              |
|------|----------|---------------------|--------------|
| 1360 | Prmt2    | ENSMUSG00000020230  | 0.560223307  |
| 1361 | Rack1    | ENSMUSG00000020372  | 0.560178981  |
| 1362 | Rab5a    | ENSMUSG00000017831  | 0.55994017   |
| 1363 | Slc11a2  | ENSMUSG00000023030  | 0.559739773  |
| 1364 | Blvra    | ENSMUSG00000001999  | 0.559022061  |
| 1365 | Lnpg     | ENSMUSG00000009207  | 0.558561254  |
| 1366 | Sumf1    | ENSMUSG00000030101  | 0.558050627  |
| 1367 | Dusp27   | ENSMUSG00000026564  | 0.557232968  |
| 1368 | Zfp330   | ENSMUSG00000031711  | 0.556388189  |
| 1369 | Tasp1    | ENSMUSG00000039033  | 0.555967599  |
| 1370 | Asap2    | ENSMUSG00000052632  | 0.555036211  |
| 1371 | Ptpn1    | ENSMUSG00000027540  | 0.554938869  |
| 1372 | Zbtb6    | ENSMUSG00000066798  | 0.554409184  |
| 1373 | Hnrnpf   | ENSMUSG00000042079  | 0.553946945  |
| 1374 | Ppip5k1  | ENSMUSG00000033526  | 0.553921651  |
| 1375 | Arhgap12 | ENSMUSG00000041225  | 0.553714279  |
| 1376 | Ddost    | ENSMUSG00000028757  | 0.552975811  |
| 1377 | Fcf1     | ENSMUSG00000021243  | 0.551800679  |
| 1378 | Gm10275  | ENSMUSG00000069682  | 0.551041155  |
| 1379 | Rnft1    | ENSMUSG00000020521  | 0.549530386  |
| 1380 | Gm15500  | ENSMUSG00000086583  | 0.549512492  |
| 1381 | Cct2     | ENSMUSG00000034024  | 0.549296809  |
| 1382 | Esyt2    | ENSMUSG00000021171  | 0.549186355  |
| 1383 | Anapc10  | ENSMUSG00000036977  | 0.548612062  |
| 1384 | Gfpt1    | ENSMUSG00000029992  | 0.548423544  |
| 1385 | Ufm1     | ENSMUSG00000027746  | 0.547345291  |
| 1386 | Rps12    | ENSMUSG00000061983  | 0.547126738  |
| 1387 | Wbscr22  | ENSMUSG00000005378  | 0.546905029  |
| 1388 | Plekho1  | ENSMUSG00000015745  | 0.546833989  |
| 1389 | Jund     | ENSMUSG00000071076  | 0.546304886  |
| 1390 | Tcerg1   | ENSMUSG00000024498  | 0.546265948  |
| 1391 | Tesk1    | ENSMUSG00000028458  | 0.545899804  |
| 1392 | Eif2s1   | ENSMUSG00000021116  | 0.545643719  |
| 1393 | Mtr      | ENSMUSG00000021311  | 0.544752927  |
| 1394 | Fam192a  | ENSMUSG00000031774  | 0.5444488305 |
| 1395 | Cacul1   | ENSMUSG00000033417  | 0.54428689   |
| 1396 | Ran      | ENSMUSG00000029430  | 0.542801135  |
| 1397 | Commd4   | ENSMUSG00000032299  | 0.542503083  |
| 1398 | Pcdhgc3  | ENSMUSG000000102918 | 0.541874673  |
| 1399 | Gsr      | ENSMUSG00000031584  | 0.541721894  |
| 1400 | Ascc2    | ENSMUSG00000020412  | 0.540838018  |
| 1401 | Edem3    | ENSMUSG00000043019  | 0.540722206  |
| 1402 | Scamp2   | ENSMUSG00000040188  | 0.540442832  |
| 1403 | Gyg      | ENSMUSG00000019528  | 0.539156464  |
| 1404 | Tatdn1   | ENSMUSG00000050891  | 0.538008144  |
| 1405 | Tgm2     | ENSMUSG00000037820  | 0.537466052  |
| 1406 | Snrpf    | ENSMUSG00000020018  | 0.536775913  |

|      |          |                    |             |
|------|----------|--------------------|-------------|
| 1407 | Uba5     | ENSMUSG00000032557 | 0.536745484 |
| 1408 | Gnptab   | ENSMUSG00000035311 | 0.536514154 |
| 1409 | Smpx     | ENSMUSG00000041476 | 0.536432807 |
| 1410 | Zc3h7a   | ENSMUSG00000037965 | 0.536316795 |
| 1411 | Gm26917  | ENSMUSG00000097971 | 0.53567106  |
| 1412 | Gls      | ENSMUSG00000026103 | 0.535524031 |
| 1413 | Sdcbp    | ENSMUSG00000028249 | 0.534253874 |
| 1414 | Arhgap20 | ENSMUSG00000053199 | 0.534000412 |
| 1415 | Anxa7    | ENSMUSG00000021814 | 0.532414861 |
| 1416 | Gm6136   | ENSMUSG00000084106 | 0.532066705 |
| 1417 | Maged2   | ENSMUSG00000025268 | 0.531469614 |
| 1418 | Rpl13    | ENSMUSG00000000740 | 0.531304063 |
| 1419 | Txndc17  | ENSMUSG00000020803 | 0.530715324 |
| 1420 | Polr1b   | ENSMUSG00000027395 | 0.530455322 |
| 1421 | Pgrmc2   | ENSMUSG00000049940 | 0.528930034 |
| 1422 | Sec61a1  | ENSMUSG00000030082 | 0.528825325 |
| 1423 | Selenok  | ENSMUSG00000042682 | 0.528515985 |
| 1424 | Mettl2   | ENSMUSG00000020691 | 0.52787577  |
| 1425 | Nedd4l   | ENSMUSG00000024589 | 0.527241157 |
| 1426 | Hspa14   | ENSMUSG00000109865 | 0.526804674 |
| 1427 | Rpl4     | ENSMUSG00000032399 | 0.526427875 |
| 1428 | Timm17b  | ENSMUSG00000031158 | 0.526378283 |
| 1429 | Ogfrl1   | ENSMUSG00000026158 | 0.525974161 |
| 1430 | Twf2     | ENSMUSG00000023277 | 0.524151338 |
| 1431 | Qars     | ENSMUSG00000032604 | 0.52410875  |
| 1432 | Zcchc7   | ENSMUSG00000035649 | 0.523261157 |
| 1433 | Sec24a   | ENSMUSG00000036391 | 0.523249415 |
| 1434 | Gm9794   | ENSMUSG00000107176 | 0.522853865 |
| 1435 | Vapa     | ENSMUSG00000024091 | 0.521932574 |
| 1436 | Cct5     | ENSMUSG00000022234 | 0.521632792 |
| 1437 | Ythdc2   | ENSMUSG00000034653 | 0.521246085 |
| 1438 | Rps18    | ENSMUSG00000008668 | 0.521134919 |
| 1439 | Gtf3c6   | ENSMUSG00000019837 | 0.520981546 |
| 1440 | Imp4     | ENSMUSG00000026127 | 0.520974461 |
| 1441 | Atp6v0a2 | ENSMUSG00000038023 | 0.520967279 |
| 1442 | Eef1d    | ENSMUSG00000055762 | 0.520926659 |
| 1443 | Pabpc1   | ENSMUSG00000022283 | 0.520114387 |
| 1444 | Usp9x    | ENSMUSG00000031010 | 0.520076771 |
| 1445 | Mtmr9    | ENSMUSG00000035078 | 0.519041252 |
| 1446 | Uap1     | ENSMUSG00000026670 | 0.518762823 |
| 1447 | Lmna     | ENSMUSG00000028063 | 0.518272094 |
| 1448 | Msn      | ENSMUSG00000031207 | 0.51705165  |
| 1449 | Rpl37    | ENSMUSG00000041841 | 0.516447015 |
| 1450 | Arpc1b   | ENSMUSG00000029622 | 0.515515079 |
| 1451 | Elof1    | ENSMUSG00000013822 | 0.515378858 |
| 1452 | Khsrp    | ENSMUSG00000007670 | 0.515315131 |
| 1453 | Uba6     | ENSMUSG00000035898 | 0.515108656 |

|      |               |                    |             |
|------|---------------|--------------------|-------------|
| 1454 | Dpysl3        | ENSMUSG00000024501 | 0.51427296  |
| 1455 | Ergic1        | ENSMUSG00000001576 | 0.513845711 |
| 1456 | Mib1          | ENSMUSG00000024294 | 0.513508284 |
| 1457 | Snx6          | ENSMUSG00000005656 | 0.513002019 |
| 1458 | Ddx27         | ENSMUSG00000017999 | 0.512623582 |
| 1459 | Rspry1        | ENSMUSG00000050079 | 0.512027889 |
| 1460 | Scfd1         | ENSMUSG00000020952 | 0.511947739 |
| 1461 | Bysl          | ENSMUSG00000023988 | 0.510829898 |
| 1462 | Pnp           | ENSMUSG00000021871 | 0.510733136 |
| 1463 | Adamts2       | ENSMUSG00000036545 | 0.510538921 |
| 1464 | Ralgps1       | ENSMUSG00000038831 | 0.510487815 |
| 1465 | Exosc9        | ENSMUSG00000027714 | 0.509835303 |
| 1466 | Abce1         | ENSMUSG00000058355 | 0.509233442 |
| 1467 | Dyrk2         | ENSMUSG00000028630 | 0.508790477 |
| 1468 | Dis3          | ENSMUSG00000033166 | 0.508518208 |
| 1469 | Rplp1         | ENSMUSG00000007892 | 0.508212368 |
| 1470 | Ccdc6         | ENSMUSG00000048701 | 0.507225369 |
| 1471 | Hspa13        | ENSMUSG00000032932 | 0.507138892 |
| 1472 | Wdr43         | ENSMUSG00000041057 | 0.506417679 |
| 1473 | Epb41         | ENSMUSG00000028906 | 0.505875092 |
| 1474 | Mtpn          | ENSMUSG00000029840 | 0.505665596 |
| 1475 | Atr           | ENSMUSG00000032409 | 0.505648778 |
| 1476 | Nupl1         | ENSMUSG00000063895 | 0.505096689 |
| 1477 | Traf7         | ENSMUSG00000052752 | 0.504886147 |
| 1478 | Ptges3-ps     | ENSMUSG00000040078 | 0.504635487 |
| 1479 | Rps20         | ENSMUSG00000028234 | 0.504393132 |
| 1480 | Eif5a         | ENSMUSG00000078812 | 0.502601419 |
| 1481 | Tbce          | ENSMUSG00000039233 | 0.502541866 |
| 1482 | Psme2         | ENSMUSG00000079197 | 0.502236661 |
| 1483 | Plaa          | ENSMUSG00000028577 | 0.501379027 |
| 1484 | Mtdh          | ENSMUSG00000022255 | 0.501300669 |
| 1485 | Rpl15         | ENSMUSG00000012405 | 0.50108021  |
| 1486 | Rps23         | ENSMUSG00000049517 | 0.50065545  |
| 1487 | Larp1         | ENSMUSG00000037331 | 0.500420423 |
| 1488 | Eif2a         | ENSMUSG00000027810 | 0.500170125 |
| 1489 | 1110008F13Rik | ENSMUSG00000027637 | 0.499021313 |
| 1490 | Ap2b1         | ENSMUSG00000035152 | 0.498820397 |
| 1491 | Pes1          | ENSMUSG00000020430 | 0.498363938 |
| 1492 | Pigm          | ENSMUSG00000050229 | 0.498275869 |
| 1493 | Nmt1          | ENSMUSG00000020936 | 0.498171532 |
| 1494 | Set           | ENSMUSG00000054766 | 0.498097334 |
| 1495 | Ttc13         | ENSMUSG00000037300 | 0.498063021 |
| 1496 | Utp11         | ENSMUSG00000028907 | 0.497994406 |
| 1497 | Naa25         | ENSMUSG00000042719 | 0.497062382 |
| 1498 | Twf1          | ENSMUSG00000022451 | 0.496746642 |
| 1499 | Nacc1         | ENSMUSG00000001910 | 0.496606494 |
| 1500 | Ngdn          | ENSMUSG00000022204 | 0.496259281 |

|      |          |                    |             |
|------|----------|--------------------|-------------|
| 1501 | Exoc2    | ENSMUSG00000021357 | 0.495969666 |
| 1502 | Rps8     | ENSMUSG00000047675 | 0.495867146 |
| 1503 | Sept10   | ENSMUSG00000019917 | 0.495383284 |
| 1504 | Dhx29    | ENSMUSG00000042426 | 0.494292892 |
| 1505 | Nelfe    | ENSMUSG00000024369 | 0.494029333 |
| 1506 | Snx4     | ENSMUSG00000022808 | 0.492311794 |
| 1507 | Dnajb2   | ENSMUSG00000026203 | 0.491360664 |
| 1508 | Rrp36    | ENSMUSG00000023971 | 0.490777527 |
| 1509 | Vcpip1   | ENSMUSG00000045210 | 0.489566213 |
| 1510 | Btf3     | ENSMUSG00000021660 | 0.488985218 |
| 1511 | Snap29   | ENSMUSG00000022765 | 0.488839177 |
| 1512 | Gdap2    | ENSMUSG00000027865 | 0.486409295 |
| 1513 | Col5a2   | ENSMUSG00000026042 | 0.48619249  |
| 1514 | Tnpo1    | ENSMUSG00000009470 | 0.485193635 |
| 1515 | Mtmr12   | ENSMUSG00000039458 | 0.484172984 |
| 1516 | Kdelr2   | ENSMUSG00000079111 | 0.484165692 |
| 1517 | Zfp809   | ENSMUSG00000057982 | 0.483616479 |
| 1518 | Wnk1     | ENSMUSG00000045962 | 0.482921099 |
| 1519 | Cdc42    | ENSMUSG00000006699 | 0.48291774  |
| 1520 | Rpain    | ENSMUSG00000018449 | 0.482469071 |
| 1521 | Ifnar1   | ENSMUSG00000022967 | 0.481257099 |
| 1522 | Capza1   | ENSMUSG00000070372 | 0.48085383  |
| 1523 | Pex2     | ENSMUSG00000040374 | 0.480696842 |
| 1524 | Usp22    | ENSMUSG00000042506 | 0.480619961 |
| 1525 | Ap1s1    | ENSMUSG00000004849 | 0.480458595 |
| 1526 | Ank3     | ENSMUSG00000069601 | 0.480387379 |
| 1527 | BC017643 | ENSMUSG00000039294 | 0.480156834 |
| 1528 | Nrd1     | ENSMUSG00000053510 | 0.479951824 |
| 1529 | Atp6v1a  | ENSMUSG00000052459 | 0.479716457 |
| 1530 | Cpeb2    | ENSMUSG00000039782 | 0.479321725 |
| 1531 | Rpl27a   | ENSMUSG00000046364 | 0.478058747 |
| 1532 | Rplp0    | ENSMUSG00000067274 | 0.477678845 |
| 1533 | Tmem57   | ENSMUSG00000028826 | 0.477620117 |
| 1534 | Aspscr1  | ENSMUSG00000025142 | 0.476714939 |
| 1535 | Rpl35a   | ENSMUSG00000060636 | 0.476592185 |
| 1536 | Eif3c    | ENSMUSG00000030738 | 0.476556054 |
| 1537 | Fer      | ENSMUSG00000000127 | 0.475780649 |
| 1538 | Nsun2    | ENSMUSG00000021595 | 0.475446391 |
| 1539 | Tmem159  | ENSMUSG00000030917 | 0.474912436 |
| 1540 | Pikfyve  | ENSMUSG00000025949 | 0.474014519 |
| 1541 | Rap1a    | ENSMUSG00000068798 | 0.47161947  |
| 1542 | Zfp277   | ENSMUSG00000055917 | 0.471340675 |
| 1543 | Kras     | ENSMUSG00000030265 | 0.47105097  |
| 1544 | Prrc1    | ENSMUSG00000024594 | 0.46918257  |
| 1545 | Meis1    | ENSMUSG00000020160 | 0.468645237 |
| 1546 | Tatdn2   | ENSMUSG00000056952 | 0.468427648 |
| 1547 | Rpl18    | ENSMUSG00000059070 | 0.468298467 |



|      |            |                    |             |
|------|------------|--------------------|-------------|
| 1548 | Apobec2    | ENSMUSG00000040694 | 0.467918891 |
| 1549 | Nop9       | ENSMUSG00000019297 | 0.467913558 |
| 1550 | Ppme1      | ENSMUSG00000030718 | 0.467808746 |
| 1551 | Hnrnpab    | ENSMUSG00000020358 | 0.467596901 |
| 1552 | Rps7       | ENSMUSG00000061477 | 0.467217561 |
| 1553 | Polr3d     | ENSMUSG00000000776 | 0.466640189 |
| 1554 | Tmem131    | ENSMUSG00000026116 | 0.466395694 |
| 1555 | Rprd1a     | ENSMUSG00000040446 | 0.46630709  |
| 1556 | Large1     | ENSMUSG00000004383 | 0.465827982 |
| 1557 | Ppm1a      | ENSMUSG00000021096 | 0.465810417 |
| 1558 | Impdh2     | ENSMUSG00000062867 | 0.464314265 |
| 1559 | Foxk2      | ENSMUSG00000039275 | 0.464100051 |
| 1560 | Slc39a1    | ENSMUSG00000052310 | 0.463241415 |
| 1561 | Sec22b     | ENSMUSG00000027879 | 0.462370633 |
| 1562 | Rnf220     | ENSMUSG00000028677 | 0.462087496 |
| 1563 | Hprt       | ENSMUSG00000025630 | 0.461867288 |
| 1564 | Stt3a      | ENSMUSG00000032116 | 0.460882392 |
| 1565 | Rusc2      | ENSMUSG00000035969 | 0.460422338 |
| 1566 | Fbxo30     | ENSMUSG00000047648 | 0.459889961 |
| 1567 | Ptbp1      | ENSMUSG00000006498 | 0.459552879 |
| 1568 | Pdcd6ip    | ENSMUSG00000032504 | 0.459538872 |
| 1569 | Pak1ip1    | ENSMUSG00000038683 | 0.45920386  |
| 1570 | Rpl5       | ENSMUSG00000058558 | 0.45759172  |
| 1571 | Gclc       | ENSMUSG00000032350 | 0.457365506 |
| 1572 | Atp6v0e    | ENSMUSG00000015575 | 0.455534365 |
| 1573 | Tspo       | ENSMUSG00000041736 | 0.455357739 |
| 1574 | Rngtt      | ENSMUSG00000028274 | 0.45518463  |
| 1575 | Arpc5      | ENSMUSG00000008475 | 0.455169113 |
| 1576 | Vta1       | ENSMUSG00000019868 | 0.455165181 |
| 1577 | Nup153     | ENSMUSG00000021374 | 0.452302113 |
| 1578 | Rpl19-ps11 | ENSMUSG00000081094 | 0.451845185 |
| 1579 | Sdc2       | ENSMUSG00000022261 | 0.451375996 |
| 1580 | Kpna2      | ENSMUSG00000018362 | 0.451108853 |
| 1581 | Cct7       | ENSMUSG00000030007 | 0.451064726 |
| 1582 | Plekha3    | ENSMUSG00000002733 | 0.450449321 |
| 1583 | Trim47     | ENSMUSG00000020773 | 0.450051423 |
| 1584 | Ell2       | ENSMUSG00000001542 | 0.449405846 |
| 1585 | Psm13      | ENSMUSG00000025487 | 0.449189383 |
| 1586 | Ube2s      | ENSMUSG00000060860 | 0.448979167 |
| 1587 | Ncln       | ENSMUSG00000020238 | 0.448881513 |
| 1588 | Tprgl      | ENSMUSG00000029030 | 0.447808781 |
| 1589 | Anxa5      | ENSMUSG00000027712 | 0.447580481 |
| 1590 | C1galt1    | ENSMUSG00000042460 | 0.447490504 |
| 1591 | Otud6b     | ENSMUSG00000040550 | 0.447360687 |
| 1592 | Gpr89      | ENSMUSG00000028096 | 0.446185855 |
| 1593 | Rpl6       | ENSMUSG00000029614 | 0.445430246 |
| 1594 | Creb3      | ENSMUSG00000028466 | 0.444868288 |

|      |               |                    |             |
|------|---------------|--------------------|-------------|
| 1595 | Acbd3         | ENSMUSG00000026499 | 0.444834976 |
| 1596 | Myl6          | ENSMUSG00000090841 | 0.44477446  |
| 1597 | Celf2         | ENSMUSG00000002107 | 0.443389626 |
| 1598 | Stk4          | ENSMUSG00000018209 | 0.44306901  |
| 1599 | Stam2         | ENSMUSG00000055371 | 0.442407482 |
| 1600 | Bcl10         | ENSMUSG00000028191 | 0.441448134 |
| 1601 | Ankrd13a      | ENSMUSG00000041870 | 0.441141247 |
| 1602 | Ubxn4         | ENSMUSG00000026353 | 0.440828321 |
| 1603 | Txn1          | ENSMUSG00000028367 | 0.440760263 |
| 1604 | Nt5c2         | ENSMUSG00000025041 | 0.440499317 |
| 1605 | Vim           | ENSMUSG00000026728 | 0.440447875 |
| 1606 | Tnpo2         | ENSMUSG00000031691 | 0.440413941 |
| 1607 | Actl6a        | ENSMUSG00000027671 | 0.439581209 |
| 1608 | Apc           | ENSMUSG00000005871 | 0.438561537 |
| 1609 | Ipo7          | ENSMUSG00000066232 | 0.438287864 |
| 1610 | Atxn10        | ENSMUSG00000016541 | 0.438244785 |
| 1611 | Clec16a       | ENSMUSG00000068663 | 0.438069619 |
| 1612 | Hspb2         | ENSMUSG00000038086 | 0.437749757 |
| 1613 | Klh28         | ENSMUSG00000020948 | 0.436341544 |
| 1614 | Tapt1         | ENSMUSG00000046985 | 0.4344988   |
| 1615 | Lnx2          | ENSMUSG00000016520 | 0.433632558 |
| 1616 | Raph1         | ENSMUSG00000026014 | 0.433568542 |
| 1617 | Rab8a         | ENSMUSG00000003037 | 0.433239524 |
| 1618 | Dnajc14       | ENSMUSG00000025354 | 0.432367351 |
| 1619 | Lig3          | ENSMUSG00000020697 | 0.43221014  |
| 1620 | Ppp1r10       | ENSMUSG00000039220 | 0.432036417 |
| 1621 | Golgb1        | ENSMUSG00000034243 | 0.431179617 |
| 1622 | Agps          | ENSMUSG00000042410 | 0.429622442 |
| 1623 | 2410004B18Rik | ENSMUSG00000036873 | 0.429123234 |
| 1624 | Polr1d        | ENSMUSG00000029642 | 0.429083038 |
| 1625 | Ifit2         | ENSMUSG00000045932 | 0.428185087 |
| 1626 | Pdpk1         | ENSMUSG00000024122 | 0.427992282 |
| 1627 | Shc1          | ENSMUSG00000042626 | 0.427736386 |
| 1628 | Rpl11         | ENSMUSG00000059291 | 0.427510886 |
| 1629 | Psen1         | ENSMUSG00000019969 | 0.425337299 |
| 1630 | Mob1b         | ENSMUSG00000006262 | 0.424911449 |
| 1631 | Dnajb14       | ENSMUSG00000074212 | 0.424691855 |
| 1632 | Pdcl          | ENSMUSG00000009030 | 0.423479042 |
| 1633 | Nfe2l1        | ENSMUSG00000038615 | 0.423458423 |
| 1634 | Cerk          | ENSMUSG00000035891 | 0.422612544 |
| 1635 | Uspl1         | ENSMUSG00000041264 | 0.422298345 |
| 1636 | Zfr           | ENSMUSG00000022201 | 0.422083471 |
| 1637 | Zzef1         | ENSMUSG00000055670 | 0.421255634 |
| 1638 | Arhgap35      | ENSMUSG00000058230 | 0.421243693 |
| 1639 | Cpsf2         | ENSMUSG00000041781 | 0.421154457 |
| 1640 | Senp2         | ENSMUSG00000022855 | 0.420867142 |
| 1641 | Vkorc1l1      | ENSMUSG00000066735 | 0.419948769 |

|      |           |                     |             |
|------|-----------|---------------------|-------------|
| 1642 | Tor1aip2  | ENSMUSG00000050565  | 0.419690379 |
| 1643 | Gopc      | ENSMUSG00000019861  | 0.418279038 |
| 1644 | Rpl19     | ENSMUSG00000017404  | 0.417853569 |
| 1645 | Ormdl3    | ENSMUSG00000038150  | 0.41609523  |
| 1646 | Vps50     | ENSMUSG00000001376  | 0.416003245 |
| 1647 | Tmem167b  | ENSMUSG00000068732  | 0.4141696   |
| 1648 | Atp2b1    | ENSMUSG00000019943  | 0.413375903 |
| 1649 | Ctr9      | ENSMUSG00000005609  | 0.411103842 |
| 1650 | Rpl32     | ENSMUSG000000057841 | 0.410686893 |
| 1651 | Shmt2     | ENSMUSG00000025403  | 0.410606786 |
| 1652 | Nfu1      | ENSMUSG00000029993  | 0.410467612 |
| 1653 | Rtfdc1    | ENSMUSG00000027502  | 0.409129447 |
| 1654 | Rpl36a    | ENSMUSG00000079435  | 0.406900204 |
| 1655 | Arhgap44  | ENSMUSG00000033389  | 0.406653807 |
| 1656 | Mapkap1   | ENSMUSG00000038696  | 0.403232633 |
| 1657 | Cdc27     | ENSMUSG00000020687  | 0.397319585 |
| 1658 | Rpl38     | ENSMUSG000000057322 | 0.395963629 |
| 1659 | Rps28     | ENSMUSG000000067288 | 0.395527258 |
| 1660 | Agpat5    | ENSMUSG000000031467 | 0.395433606 |
| 1661 | Usp16     | ENSMUSG00000025616  | 0.394837266 |
| 1662 | Kmt2c     | ENSMUSG00000038056  | 0.393548682 |
| 1663 | Rps11     | ENSMUSG000000003429 | 0.390542775 |
| 1664 | Nckap1    | ENSMUSG00000027002  | 0.39046974  |
| 1665 | Rps6      | ENSMUSG00000028495  | 0.389588619 |
| 1666 | Rpl23     | ENSMUSG000000071415 | 0.388202902 |
| 1667 | Spcs1     | ENSMUSG00000021917  | 0.388074753 |
| 1668 | Rer1      | ENSMUSG00000029048  | 0.387121349 |
| 1669 | Rpl21     | ENSMUSG000000041453 | 0.387085901 |
| 1670 | Herpud2   | ENSMUSG000000008429 | 0.387057779 |
| 1671 | Tex2      | ENSMUSG000000040548 | 0.387042778 |
| 1672 | Rpl34     | ENSMUSG000000062006 | 0.384011235 |
| 1673 | Rad23b    | ENSMUSG00000028426  | 0.382016811 |
| 1674 | Smurf2    | ENSMUSG00000018363  | 0.381844884 |
| 1675 | Ssu72     | ENSMUSG00000029038  | 0.378402997 |
| 1676 | Actr2     | ENSMUSG00000020152  | 0.372350328 |
| 1677 | Sec16a    | ENSMUSG00000026924  | 0.368718913 |
| 1678 | Vcl       | ENSMUSG00000021823  | 0.367809184 |
| 1679 | Kcmf1     | ENSMUSG000000055239 | 0.366537133 |
| 1680 | Hist1h2bc | ENSMUSG00000018102  | 0.366213554 |
| 1681 | Ap3d1     | ENSMUSG00000020198  | 0.365877498 |
| 1682 | Gspt1     | ENSMUSG000000062203 | 0.362498791 |
| 1683 | Emg1      | ENSMUSG000000004268 | 0.36048787  |
| 1684 | Rpl26     | ENSMUSG000000060938 | 0.358523171 |
| 1685 | Papola    | ENSMUSG00000021111  | 0.353600692 |
| 1686 | Ltn1      | ENSMUSG000000052299 | 0.346780688 |
| 1687 | Zbtb18    | ENSMUSG000000063659 | 0.345898917 |
| 1688 | Dync1i2   | ENSMUSG00000027012  | 0.343053737 |

|      |          |                    |              |
|------|----------|--------------------|--------------|
| 1689 | Gm12338  | ENSMUSG00000081485 | -0.32659715  |
| 1690 | Stard13  | ENSMUSG00000016128 | -0.33002037  |
| 1691 | Mcur1    | ENSMUSG00000021371 | -0.331018492 |
| 1692 | Anapc16  | ENSMUSG00000020107 | -0.334941423 |
| 1693 | Ctcf     | ENSMUSG00000005698 | -0.340043238 |
| 1694 | Gid4     | ENSMUSG00000018415 | -0.341031179 |
| 1695 | Suclg1   | ENSMUSG00000052738 | -0.344632806 |
| 1696 | Phkb     | ENSMUSG00000036879 | -0.345880192 |
| 1697 | Mrpl16   | ENSMUSG00000024683 | -0.347104116 |
| 1698 | Nt5c3    | ENSMUSG00000029780 | -0.347197258 |
| 1699 | Ndufa4   | ENSMUSG00000029632 | -0.347321075 |
| 1700 | Dld      | ENSMUSG00000020664 | -0.348359566 |
| 1701 | Ndufs5   | ENSMUSG00000028648 | -0.349959395 |
| 1702 | Mtif2    | ENSMUSG00000020459 | -0.351120021 |
| 1703 | Mrpl41   | ENSMUSG00000036850 | -0.351442806 |
| 1704 | Flcn     | ENSMUSG00000032633 | -0.353979766 |
| 1705 | Apoo     | ENSMUSG00000079508 | -0.354620094 |
| 1706 | Rpa1     | ENSMUSG00000000751 | -0.354874065 |
| 1707 | Aplp2    | ENSMUSG00000031996 | -0.355060563 |
| 1708 | Eif4a2   | ENSMUSG00000022884 | -0.355081246 |
| 1709 | Ktn1     | ENSMUSG00000021843 | -0.35553506  |
| 1710 | Idh3a    | ENSMUSG00000032279 | -0.356127016 |
| 1711 | Ghr      | ENSMUSG00000055737 | -0.356919536 |
| 1712 | Uqcr11   | ENSMUSG00000020163 | -0.363028684 |
| 1713 | Arhgef6  | ENSMUSG00000031133 | -0.364397921 |
| 1714 | Snapin   | ENSMUSG00000001018 | -0.364730865 |
| 1715 | Rab12    | ENSMUSG00000023460 | -0.366912246 |
| 1716 | Zbtb44   | ENSMUSG00000047412 | -0.3678623   |
| 1717 | Tfb2m    | ENSMUSG00000026492 | -0.368367894 |
| 1718 | Bola3    | ENSMUSG00000045160 | -0.368409315 |
| 1719 | AI314180 | ENSMUSG00000050812 | -0.370341583 |
| 1720 | Pkig     | ENSMUSG00000035268 | -0.370865955 |
| 1721 | Gfm1     | ENSMUSG00000027774 | -0.372045633 |
| 1722 | Rfc1     | ENSMUSG00000029191 | -0.373279742 |
| 1723 | Mrps7    | ENSMUSG00000046756 | -0.373571505 |
| 1724 | Tmem70   | ENSMUSG00000025940 | -0.373700669 |
| 1725 | Rgl2     | ENSMUSG00000041354 | -0.374237516 |
| 1726 | Comt     | ENSMUSG00000000326 | -0.374500043 |
| 1727 | Ttc3     | ENSMUSG00000040785 | -0.375445622 |
| 1728 | Slc2a4   | ENSMUSG00000018566 | -0.376367489 |
| 1729 | Apbb2    | ENSMUSG00000029207 | -0.376437254 |
| 1730 | Slc29a1  | ENSMUSG00000023942 | -0.377334309 |
| 1731 | Ephb4    | ENSMUSG00000029710 | -0.378476259 |
| 1732 | Podxl    | ENSMUSG00000025608 | -0.378840206 |
| 1733 | Acad8    | ENSMUSG00000031969 | -0.380084657 |
| 1734 | Nfs1     | ENSMUSG00000027618 | -0.380273806 |
| 1735 | Mov10l1  | ENSMUSG00000015365 | -0.380571431 |

|      |               |                    |              |
|------|---------------|--------------------|--------------|
| 1736 | Rbfa          | ENSMUSG00000024570 | -0.380868045 |
| 1737 | Vdac1         | ENSMUSG00000020402 | -0.38107449  |
| 1738 | Cmtm4         | ENSMUSG00000096188 | -0.381093678 |
| 1739 | Gns           | ENSMUSG00000034707 | -0.382467044 |
| 1740 | Vezf1         | ENSMUSG00000018377 | -0.382484952 |
| 1741 | Ahcyl1        | ENSMUSG00000027893 | -0.383608464 |
| 1742 | Ppp2r3a       | ENSMUSG00000043154 | -0.383720923 |
| 1743 | Ciapi1        | ENSMUSG00000031781 | -0.384716711 |
| 1744 | Adh5          | ENSMUSG00000028138 | -0.385524887 |
| 1745 | Jmy           | ENSMUSG00000021690 | -0.386333091 |
| 1746 | Palld         | ENSMUSG00000058056 | -0.38674525  |
| 1747 | Hibch         | ENSMUSG00000041426 | -0.386842623 |
| 1748 | Mrpl45        | ENSMUSG00000018882 | -0.386998359 |
| 1749 | Irak1         | ENSMUSG00000031392 | -0.388013884 |
| 1750 | Etfb          | ENSMUSG00000004610 | -0.388530487 |
| 1751 | Shroom4       | ENSMUSG00000068270 | -0.38858819  |
| 1752 | Palmd         | ENSMUSG00000033377 | -0.38982511  |
| 1753 | Prex2         | ENSMUSG00000048960 | -0.389829878 |
| 1754 | Ank           | ENSMUSG00000022265 | -0.390274588 |
| 1755 | Bves          | ENSMUSG00000071317 | -0.39070521  |
| 1756 | Spin1         | ENSMUSG00000021395 | -0.391893133 |
| 1757 | Uqcc1         | ENSMUSG00000005882 | -0.392293332 |
| 1758 | Mlip          | ENSMUSG00000032355 | -0.393328936 |
| 1759 | Adgre5        | ENSMUSG00000002885 | -0.39416034  |
| 1760 | 5730455P16Rik | ENSMUSG00000057181 | -0.394775112 |
| 1761 | Uaca          | ENSMUSG00000034485 | -0.395337858 |
| 1762 | Mrpl50        | ENSMUSG00000044018 | -0.39562716  |
| 1763 | P4ha2         | ENSMUSG00000018906 | -0.396374056 |
| 1764 | Tcf4          | ENSMUSG00000053477 | -0.396465483 |
| 1765 | Supv3l1       | ENSMUSG00000020079 | -0.39674517  |
| 1766 | Pdrg1         | ENSMUSG00000027472 | -0.396891552 |
| 1767 | Xdh           | ENSMUSG00000024066 | -0.397427326 |
| 1768 | Mrps31        | ENSMUSG00000031533 | -0.399327557 |
| 1769 | Mrpl42        | ENSMUSG00000062981 | -0.400101018 |
| 1770 | Tsnax         | ENSMUSG00000056820 | -0.400419765 |
| 1771 | Pdss2         | ENSMUSG00000038240 | -0.401185742 |
| 1772 | Prdx2         | ENSMUSG00000005161 | -0.401256028 |
| 1773 | Ecsit         | ENSMUSG00000066839 | -0.401710685 |
| 1774 | Plekha2       | ENSMUSG00000031557 | -0.402065752 |
| 1775 | Smpd3a        | ENSMUSG00000019872 | -0.402201202 |
| 1776 | 1810037117Rik | ENSMUSG00000054091 | -0.4027868   |
| 1777 | Sf3b2         | ENSMUSG00000024853 | -0.402934623 |
| 1778 | Stard8        | ENSMUSG00000031216 | -0.403251273 |
| 1779 | Ndufc1        | ENSMUSG00000037152 | -0.403557617 |
| 1780 | Uqcrb         | ENSMUSG00000021520 | -0.40472659  |
| 1781 | Filip1        | ENSMUSG00000034898 | -0.404808973 |
| 1782 | Man2a2        | ENSMUSG00000038886 | -0.404907511 |

|      |               |                     |              |
|------|---------------|---------------------|--------------|
| 1783 | Csnk1e        | ENSMUSG00000022433  | -0.405508405 |
| 1784 | Mmaa          | ENSMUSG00000037022  | -0.405567551 |
| 1785 | Man2c1        | ENSMUSG00000032295  | -0.405740406 |
| 1786 | Atp5j2        | ENSMUSG00000038690  | -0.406058583 |
| 1787 | Rcor3         | ENSMUSG00000037395  | -0.406366566 |
| 1788 | Ndufa1        | ENSMUSG00000016427  | -0.406645634 |
| 1789 | Ptprg         | ENSMUSG00000021745  | -0.40686054  |
| 1790 | Rad23a        | ENSMUSG00000003813  | -0.406870035 |
| 1791 | Vegfa         | ENSMUSG00000023951  | -0.407265505 |
| 1792 | Cox5a         | ENSMUSG00000000088  | -0.4082817   |
| 1793 | Eid1          | ENSMUSG000000091337 | -0.408287989 |
| 1794 | St3gal6       | ENSMUSG00000022747  | -0.408502881 |
| 1795 | Cenpb         | ENSMUSG00000068267  | -0.409653595 |
| 1796 | Atp5o         | ENSMUSG00000022956  | -0.412328593 |
| 1797 | Cox6c         | ENSMUSG00000014313  | -0.412378508 |
| 1798 | Ets1          | ENSMUSG00000032035  | -0.412577739 |
| 1799 | Smim14        | ENSMUSG00000037822  | -0.412740696 |
| 1800 | Hars2         | ENSMUSG00000019143  | -0.41348714  |
| 1801 | Tspan3        | ENSMUSG00000032324  | -0.413902501 |
| 1802 | Zfp106        | ENSMUSG00000027288  | -0.413933106 |
| 1803 | Atp5l         | ENSMUSG00000038717  | -0.415039908 |
| 1804 | Rev1          | ENSMUSG00000026082  | -0.416685113 |
| 1805 | Nedd4         | ENSMUSG00000032216  | -0.417731119 |
| 1806 | Cbr4          | ENSMUSG00000031641  | -0.417802571 |
| 1807 | Mrps16        | ENSMUSG00000049960  | -0.418700587 |
| 1808 | Ndufb9        | ENSMUSG00000022354  | -0.418964058 |
| 1809 | Rrm2b         | ENSMUSG00000022292  | -0.41953781  |
| 1810 | Wrnip1        | ENSMUSG00000021400  | -0.41975903  |
| 1811 | Cd200         | ENSMUSG00000022661  | -0.420676199 |
| 1812 | Zc3h7b        | ENSMUSG00000022390  | -0.421420534 |
| 1813 | Cttnbip1      | ENSMUSG00000028988  | -0.422896573 |
| 1814 | Smarcc2       | ENSMUSG00000025369  | -0.423145415 |
| 1815 | Hmox2         | ENSMUSG00000004070  | -0.424059285 |
| 1816 | Msra          | ENSMUSG00000054733  | -0.425212209 |
| 1817 | Tbc1d4        | ENSMUSG00000033083  | -0.425428003 |
| 1818 | Fnip2         | ENSMUSG00000061175  | -0.425637595 |
| 1819 | Smim10l1      | ENSMUSG00000072704  | -0.426200429 |
| 1820 | Mllt6         | ENSMUSG00000038437  | -0.426853875 |
| 1821 | A430105l19Rik | ENSMUSG00000045838  | -0.42714695  |
| 1822 | Cox4i1        | ENSMUSG00000031818  | -0.427344389 |
| 1823 | Atp5h         | ENSMUSG00000034566  | -0.428650804 |
| 1824 | Lgr6          | ENSMUSG00000042793  | -0.428864712 |
| 1825 | Kansl1l       | ENSMUSG00000026004  | -0.428936192 |
| 1826 | Zcchc24       | ENSMUSG00000055538  | -0.428954267 |
| 1827 | Epm2aip1      | ENSMUSG00000046785  | -0.429076658 |
| 1828 | Tek           | ENSMUSG00000006386  | -0.429972944 |
| 1829 | Rftn1         | ENSMUSG00000039316  | -0.430023071 |



|      |          |                    |              |
|------|----------|--------------------|--------------|
| 1830 | Glrx     | ENSMUSG00000021591 | -0.430608355 |
| 1831 | Pde3a    | ENSMUSG00000041741 | -0.431316752 |
| 1832 | Selenoo  | ENSMUSG00000035757 | -0.431788726 |
| 1833 | Cep68    | ENSMUSG00000044066 | -0.433319355 |
| 1834 | Cygb     | ENSMUSG00000020810 | -0.433380582 |
| 1835 | Timm8b   | ENSMUSG00000039016 | -0.434000733 |
| 1836 | Mrpl18   | ENSMUSG00000057388 | -0.434135841 |
| 1837 | Pgm2l1   | ENSMUSG00000030729 | -0.434628608 |
| 1838 | Tcaim    | ENSMUSG00000046603 | -0.434875459 |
| 1839 | Mrps33   | ENSMUSG00000029918 | -0.436279358 |
| 1840 | Dtnbp1   | ENSMUSG00000057531 | -0.436589855 |
| 1841 | Aifm2    | ENSMUSG00000020085 | -0.437862777 |
| 1842 | Carnmt1  | ENSMUSG00000024726 | -0.437956886 |
| 1843 | Pgm2     | ENSMUSG00000025791 | -0.439670892 |
| 1844 | Ndufv1   | ENSMUSG00000037916 | -0.440429544 |
| 1845 | Ndufc2   | ENSMUSG00000030647 | -0.440578639 |
| 1846 | Polr3gl  | ENSMUSG00000028104 | -0.440798662 |
| 1847 | Tnfrsf21 | ENSMUSG00000023915 | -0.440842091 |
| 1848 | Ndufb11  | ENSMUSG00000031059 | -0.441603042 |
| 1849 | Rapgef3  | ENSMUSG00000022469 | -0.441829968 |
| 1850 | Acadsb   | ENSMUSG00000030861 | -0.444605804 |
| 1851 | Gtf3c1   | ENSMUSG00000032777 | -0.444671925 |
| 1852 | Reln     | ENSMUSG00000042453 | -0.444903345 |
| 1853 | Lrba     | ENSMUSG00000028080 | -0.445188289 |
| 1854 | Twnk     | ENSMUSG00000025209 | -0.44587355  |
| 1855 | Stard9   | ENSMUSG00000033705 | -0.446203538 |
| 1856 | Alas1    | ENSMUSG00000032786 | -0.44675888  |
| 1857 | Txnac15  | ENSMUSG00000021497 | -0.447884249 |
| 1858 | Arhgef15 | ENSMUSG00000052921 | -0.448100767 |
| 1859 | Fastk    | ENSMUSG00000028959 | -0.448346517 |
| 1860 | Ndufa7   | ENSMUSG00000041881 | -0.449967011 |
| 1861 | Thbd     | ENSMUSG00000074743 | -0.450155336 |
| 1862 | Adgrl4   | ENSMUSG00000039167 | -0.45172235  |
| 1863 | Cacna1c  | ENSMUSG00000051331 | -0.452305951 |
| 1864 | Timm29   | ENSMUSG00000048429 | -0.452729912 |
| 1865 | Jph1     | ENSMUSG00000042686 | -0.452941575 |
| 1866 | Rn7sk    | ENSMUSG00000065037 | -0.453002356 |
| 1867 | Foxo3    | ENSMUSG00000048756 | -0.453234902 |
| 1868 | Tspan12  | ENSMUSG00000029669 | -0.453579874 |
| 1869 | Mpc1     | ENSMUSG00000023861 | -0.454010318 |
| 1870 | Arap3    | ENSMUSG00000024451 | -0.454430577 |
| 1871 | Tmtc1    | ENSMUSG00000030306 | -0.454589227 |
| 1872 | Bcap29   | ENSMUSG00000020650 | -0.45519177  |
| 1873 | Tinagl1  | ENSMUSG00000028776 | -0.455269169 |
| 1874 | Ndufb5   | ENSMUSG00000027673 | -0.456644444 |
| 1875 | Ank2     | ENSMUSG00000032826 | -0.457002989 |
| 1876 | Spg7     | ENSMUSG00000000738 | -0.457273898 |

|      |          |                     |              |
|------|----------|---------------------|--------------|
| 1877 | Clpb     | ENSMUSG00000001829  | -0.45828199  |
| 1878 | Uty      | ENSMUSG000000068457 | -0.458496734 |
| 1879 | Ermp1    | ENSMUSG000000046324 | -0.458528901 |
| 1880 | Slc25a4  | ENSMUSG000000031633 | -0.458537686 |
| 1881 | Map2k7   | ENSMUSG00000002948  | -0.459089576 |
| 1882 | Slc16a10 | ENSMUSG000000019838 | -0.459239262 |
| 1883 | Sod2     | ENSMUSG000000006818 | -0.460048499 |
| 1884 | Suclg2   | ENSMUSG000000061838 | -0.460555344 |
| 1885 | Ppp1r3c  | ENSMUSG000000067279 | -0.46061362  |
| 1886 | Cisd1    | ENSMUSG000000037710 | -0.461040091 |
| 1887 | Cers4    | ENSMUSG000000008206 | -0.461041525 |
| 1888 | Fnbp1l   | ENSMUSG000000039735 | -0.462111249 |
| 1889 | Cdh13    | ENSMUSG000000031841 | -0.462446889 |
| 1890 | Naa35    | ENSMUSG000000021555 | -0.463136319 |
| 1891 | Mcc      | ENSMUSG000000071856 | -0.463216951 |
| 1892 | E2f6     | ENSMUSG000000057469 | -0.463828688 |
| 1893 | Rxra     | ENSMUSG000000015846 | -0.46390427  |
| 1894 | Plxna2   | ENSMUSG000000026640 | -0.464090077 |
| 1895 | Tfpi     | ENSMUSG000000027082 | -0.464151348 |
| 1896 | Nectin2  | ENSMUSG000000062300 | -0.464518076 |
| 1897 | Id1      | ENSMUSG000000042745 | -0.465373756 |
| 1898 | Atp5k    | ENSMUSG000000050856 | -0.465861938 |
| 1899 | Fgd4     | ENSMUSG000000022788 | -0.465947898 |
| 1900 | Polrmt   | ENSMUSG000000020329 | -0.466013171 |
| 1901 | Gdi1     | ENSMUSG000000015291 | -0.466500275 |
| 1902 | Cyth1    | ENSMUSG000000017132 | -0.466603943 |
| 1903 | Rdh14    | ENSMUSG000000020621 | -0.467924562 |
| 1904 | Man2b1   | ENSMUSG000000005142 | -0.467970752 |
| 1905 | Cebpz    | ENSMUSG000000062691 | -0.468072836 |
| 1906 | Cox10    | ENSMUSG000000042148 | -0.46855685  |
| 1907 | Lamb1    | ENSMUSG000000002900 | -0.468698685 |
| 1908 | Sdhb     | ENSMUSG000000009863 | -0.469939549 |
| 1909 | Smim8    | ENSMUSG000000028295 | -0.470234616 |
| 1910 | Rora     | ENSMUSG000000032238 | -0.470431033 |
| 1911 | Sash1    | ENSMUSG000000015305 | -0.471569521 |
| 1912 | Ndufa10  | ENSMUSG000000026260 | -0.471907212 |
| 1913 | Inpp1    | ENSMUSG000000032737 | -0.471926812 |
| 1914 | Cog6     | ENSMUSG000000027742 | -0.472050199 |
| 1915 | Abca8b   | ENSMUSG000000020620 | -0.472167165 |
| 1916 | Pfkl     | ENSMUSG000000020277 | -0.472372865 |
| 1917 | Fbxo3    | ENSMUSG000000027180 | -0.472386005 |
| 1918 | Epha2    | ENSMUSG000000006445 | -0.472681309 |
| 1919 | Lsm3     | ENSMUSG000000034192 | -0.472934874 |
| 1920 | Mcu      | ENSMUSG000000009647 | -0.47390754  |
| 1921 | Zfp46    | ENSMUSG000000051351 | -0.474136595 |
| 1922 | Mylk3    | ENSMUSG000000031698 | -0.47469853  |
| 1923 | Hexim1   | ENSMUSG000000048878 | -0.474915967 |

|      |          |                    |              |
|------|----------|--------------------|--------------|
| 1924 | Reep5    | ENSMUSG00000005873 | -0.475325833 |
| 1925 | Phldb2   | ENSMUSG00000033149 | -0.475769131 |
| 1926 | Tor1aip1 | ENSMUSG00000026466 | -0.475785048 |
| 1927 | Gm14539  | ENSMUSG00000084830 | -0.476505704 |
| 1928 | Npr2     | ENSMUSG00000028469 | -0.476959568 |
| 1929 | Ndufa13  | ENSMUSG00000036199 | -0.477006508 |
| 1930 | Tnni3k   | ENSMUSG00000040086 | -0.47721625  |
| 1931 | Meox2    | ENSMUSG00000036144 | -0.477585602 |
| 1932 | Sptb     | ENSMUSG00000021061 | -0.477789659 |
| 1933 | Dgke     | ENSMUSG0000000276  | -0.477813778 |
| 1934 | Mhrt     | ENSMUSG00000097652 | -0.478564073 |
| 1935 | Timp3    | ENSMUSG00000020044 | -0.479300268 |
| 1936 | Clip1    | ENSMUSG00000049550 | -0.479458231 |
| 1937 | Cry2     | ENSMUSG00000068742 | -0.479977792 |
| 1938 | Tmed4    | ENSMUSG00000004394 | -0.480344669 |
| 1939 | Taf9b    | ENSMUSG00000047242 | -0.480447869 |
| 1940 | Bbs2     | ENSMUSG00000031755 | -0.480648668 |
| 1941 | Dnajc30  | ENSMUSG00000061118 | -0.482118886 |
| 1942 | Sqor     | ENSMUSG00000005803 | -0.48252714  |
| 1943 | Got2     | ENSMUSG00000031672 | -0.482837514 |
| 1944 | Pcmt2    | ENSMUSG00000027589 | -0.483453963 |
| 1945 | Ipo13    | ENSMUSG00000033365 | -0.483853739 |
| 1946 | Msh3     | ENSMUSG00000014850 | -0.484420729 |
| 1947 | Lama5    | ENSMUSG00000015647 | -0.484493385 |
| 1948 | Mtg1     | ENSMUSG00000039018 | -0.484557299 |
| 1949 | Smim20   | ENSMUSG00000061461 | -0.48501137  |
| 1950 | Slc4a3   | ENSMUSG00000006576 | -0.48533774  |
| 1951 | Dtx3     | ENSMUSG00000040415 | -0.485346335 |
| 1952 | BC002163 | ENSMUSG00000081824 | -0.48553041  |
| 1953 | Myl2     | ENSMUSG00000013936 | -0.485587731 |
| 1954 | Coq10a   | ENSMUSG00000039914 | -0.485795885 |
| 1955 | Cipc     | ENSMUSG00000034157 | -0.485832112 |
| 1956 | Usmg5    | ENSMUSG00000071528 | -0.485849192 |
| 1957 | Lpgat1   | ENSMUSG00000026623 | -0.485877902 |
| 1958 | Fabp5    | ENSMUSG00000027533 | -0.486619568 |
| 1959 | Bcl2l13  | ENSMUSG00000009112 | -0.487594302 |
| 1960 | Jcad     | ENSMUSG00000033960 | -0.487967018 |
| 1961 | Dsp      | ENSMUSG00000054889 | -0.488635126 |
| 1962 | Rsad1    | ENSMUSG00000039096 | -0.490113874 |
| 1963 | Ptprs    | ENSMUSG00000013236 | -0.491214759 |
| 1964 | Tmem60   | ENSMUSG00000045435 | -0.491417203 |
| 1965 | Dhrs1    | ENSMUSG00000002332 | -0.491445875 |
| 1966 | Pex6     | ENSMUSG00000002763 | -0.492441239 |
| 1967 | Uros     | ENSMUSG00000030979 | -0.493265423 |
| 1968 | Plekha6  | ENSMUSG00000041757 | -0.493672018 |
| 1969 | Coq7     | ENSMUSG00000030652 | -0.493836532 |
| 1970 | Fahd1    | ENSMUSG00000045316 | -0.493997542 |

|      |               |                    |              |
|------|---------------|--------------------|--------------|
| 1971 | Ldb3          | ENSMUSG00000021798 | -0.494007521 |
| 1972 | Mrps21        | ENSMUSG00000054312 | -0.494314602 |
| 1973 | Ndufa9        | ENSMUSG00000000399 | -0.494557785 |
| 1974 | Ndufa5        | ENSMUSG00000023089 | -0.494981118 |
| 1975 | Fmo1          | ENSMUSG00000040181 | -0.495617612 |
| 1976 | Msh2          | ENSMUSG00000024151 | -0.495685067 |
| 1977 | A630072M18Rik | ENSMUSG00000101013 | -0.495706507 |
| 1978 | Uqcrc2        | ENSMUSG00000030884 | -0.496340757 |
| 1979 | 4930578C19Rik | ENSMUSG00000037358 | -0.496965055 |
| 1980 | Gm10250       | ENSMUSG00000068706 | -0.497151867 |
| 1981 | Slc25a12      | ENSMUSG00000027010 | -0.49772638  |
| 1982 | Yae1d1        | ENSMUSG00000075054 | -0.497888164 |
| 1983 | Itpkb         | ENSMUSG00000038855 | -0.498209082 |
| 1984 | Ndufb4        | ENSMUSG00000022820 | -0.498355141 |
| 1985 | Hsd17b10      | ENSMUSG00000025260 | -0.498427365 |
| 1986 | Pter          | ENSMUSG00000026730 | -0.498531238 |
| 1987 | Sgk1          | ENSMUSG00000019970 | -0.49854871  |
| 1988 | Spry1         | ENSMUSG00000037211 | -0.498721526 |
| 1989 | Rgs3          | ENSMUSG00000059810 | -0.498745317 |
| 1990 | Trip10        | ENSMUSG00000019487 | -0.499011963 |
| 1991 | Stap2         | ENSMUSG00000038781 | -0.499049928 |
| 1992 | Scp2          | ENSMUSG00000028603 | -0.499407896 |
| 1993 | Asb8          | ENSMUSG00000048175 | -0.499712609 |
| 1994 | Mavs          | ENSMUSG00000037523 | -0.499742633 |
| 1995 | Taz           | ENSMUSG00000009995 | -0.500141313 |
| 1996 | Tmem141       | ENSMUSG00000026939 | -0.500241169 |
| 1997 | Ndufb8        | ENSMUSG00000025204 | -0.501315562 |
| 1998 | Oma1          | ENSMUSG00000035069 | -0.501666246 |
| 1999 | Lrprrc        | ENSMUSG00000024120 | -0.502034908 |
| 2000 | Prrg1         | ENSMUSG00000047996 | -0.502152213 |
| 2001 | Eef1a2        | ENSMUSG00000016349 | -0.502163664 |
| 2002 | Mapk14        | ENSMUSG00000053436 | -0.50273589  |
| 2003 | Synpo2        | ENSMUSG00000050315 | -0.503117568 |
| 2004 | Gm24336       | ENSMUSG00000077391 | -0.503120293 |
| 2005 | mt-Nd5        | ENSMUSG00000064367 | -0.503480609 |
| 2006 | Araf          | ENSMUSG00000001127 | -0.503613737 |
| 2007 | Rarb          | ENSMUSG00000017491 | -0.504450356 |
| 2008 | Atp5g3        | ENSMUSG00000018770 | -0.504692715 |
| 2009 | Ag1           | ENSMUSG00000033400 | -0.505072435 |
| 2010 | Ctsh          | ENSMUSG00000032359 | -0.505149262 |
| 2011 | Aamdc         | ENSMUSG00000035642 | -0.505593643 |
| 2012 | Abcb8         | ENSMUSG00000028973 | -0.506077791 |
| 2013 | Agpat2        | ENSMUSG00000026922 | -0.506377875 |
| 2014 | Il17rd        | ENSMUSG00000040717 | -0.506428322 |
| 2015 | Tnni3         | ENSMUSG00000035458 | -0.506799461 |
| 2016 | Sdhc          | ENSMUSG00000058076 | -0.507034424 |
| 2017 | Ndrgr2        | ENSMUSG00000004558 | -0.508516892 |

|      |          |                    |              |
|------|----------|--------------------|--------------|
| 2018 | Zfp189   | ENSMUSG00000039634 | -0.508517962 |
| 2019 | Dguok    | ENSMUSG00000014554 | -0.508771379 |
| 2020 | Sucla2   | ENSMUSG00000022110 | -0.50884998  |
| 2021 | Ndufs6   | ENSMUSG00000021606 | -0.509185461 |
| 2022 | Ccser2   | ENSMUSG00000058690 | -0.510071947 |
| 2023 | Nub1     | ENSMUSG00000028954 | -0.510809042 |
| 2024 | Tpra1    | ENSMUSG00000002871 | -0.511350163 |
| 2025 | Pigp     | ENSMUSG00000022940 | -0.511460763 |
| 2026 | Myo18b   | ENSMUSG00000072720 | -0.511561045 |
| 2027 | Mpc2     | ENSMUSG00000026568 | -0.512019154 |
| 2028 | Cd59a    | ENSMUSG00000032679 | -0.51205851  |
| 2029 | Rnf150   | ENSMUSG00000047747 | -0.512159164 |
| 2030 | Dlst     | ENSMUSG00000004789 | -0.512538436 |
| 2031 | Wdr41    | ENSMUSG00000042015 | -0.513011152 |
| 2032 | Shroom2  | ENSMUSG00000045180 | -0.513029325 |
| 2033 | Dlat     | ENSMUSG00000000168 | -0.513160027 |
| 2034 | Ddrgk1   | ENSMUSG00000068290 | -0.513170347 |
| 2035 | Pde4dip  | ENSMUSG00000038170 | -0.513244328 |
| 2036 | Itpripl1 | ENSMUSG00000074825 | -0.51328966  |
| 2037 | Numa1    | ENSMUSG00000066306 | -0.513641914 |
| 2038 | Serac1   | ENSMUSG00000015659 | -0.514078979 |
| 2039 | Lzts2    | ENSMUSG00000035342 | -0.514129781 |
| 2040 | Atp5sl   | ENSMUSG00000057229 | -0.51500631  |
| 2041 | Tmem164  | ENSMUSG00000047045 | -0.515103515 |
| 2042 | Enpp5    | ENSMUSG00000023960 | -0.515297892 |
| 2043 | Stx3     | ENSMUSG00000041488 | -0.515417429 |
| 2044 | Oxa1l    | ENSMUSG00000000959 | -0.515418591 |
| 2045 | Ppt1     | ENSMUSG00000028657 | -0.515568171 |
| 2046 | Rapgef5  | ENSMUSG00000041992 | -0.515703306 |
| 2047 | Oxnad1   | ENSMUSG00000021906 | -0.515790707 |
| 2048 | Kank3    | ENSMUSG00000042099 | -0.515830382 |
| 2049 | Cdkl1    | ENSMUSG00000020990 | -0.51616523  |
| 2050 | Mri1     | ENSMUSG00000004996 | -0.516393709 |
| 2051 | Smim19   | ENSMUSG00000031534 | -0.518245643 |
| 2052 | Mrpl28   | ENSMUSG00000024181 | -0.518409728 |
| 2053 | Pdpr     | ENSMUSG00000033624 | -0.518507964 |
| 2054 | Osbpl1a  | ENSMUSG00000044252 | -0.518958127 |
| 2055 | Pcp4l1   | ENSMUSG00000038370 | -0.519000315 |
| 2056 | Tpi1     | ENSMUSG00000023456 | -0.519242934 |
| 2057 | Atp5s    | ENSMUSG00000054894 | -0.5194767   |
| 2058 | Mpc1-ps  | ENSMUSG00000091498 | -0.519612732 |
| 2059 | Rcsd1    | ENSMUSG00000040723 | -0.519665016 |
| 2060 | Sema3g   | ENSMUSG00000021904 | -0.519781263 |
| 2061 | B4gat1   | ENSMUSG00000047379 | -0.520238344 |
| 2062 | Rgs5     | ENSMUSG00000026678 | -0.520650108 |
| 2063 | Apip     | ENSMUSG00000010911 | -0.521321785 |
| 2064 | Nsun4    | ENSMUSG00000028706 | -0.52210889  |

|      |            |                    |              |
|------|------------|--------------------|--------------|
| 2065 | Gadd45gip1 | ENSMUSG00000033751 | -0.522153683 |
| 2066 | Dnajc19    | ENSMUSG00000027679 | -0.522242961 |
| 2067 | Fundc2     | ENSMUSG00000031198 | -0.522678557 |
| 2068 | Flt1       | ENSMUSG00000029648 | -0.522794395 |
| 2069 | Sparcl1    | ENSMUSG00000029309 | -0.523157839 |
| 2070 | Plscr4     | ENSMUSG00000032377 | -0.523405332 |
| 2071 | Prrx1      | ENSMUSG00000026586 | -0.52369073  |
| 2072 | Gm43185    | ENSMUSG00000104621 | -0.523832049 |
| 2073 | Nicn1      | ENSMUSG00000032606 | -0.523892882 |
| 2074 | Gab1       | ENSMUSG00000031714 | -0.524940392 |
| 2075 | Erg        | ENSMUSG00000040732 | -0.525724942 |
| 2076 | Rasgrf2    | ENSMUSG00000021708 | -0.526410438 |
| 2077 | Cobll1     | ENSMUSG00000034903 | -0.527084863 |
| 2078 | Gm25395    | ENSMUSG00000087968 | -0.527095161 |
| 2079 | Coa7       | ENSMUSG00000048351 | -0.527731415 |
| 2080 | Ablim3     | ENSMUSG00000032735 | -0.527969009 |
| 2081 | Klh124     | ENSMUSG00000062901 | -0.527988182 |
| 2082 | Plekhg5    | ENSMUSG00000039713 | -0.528518378 |
| 2083 | Aven       | ENSMUSG00000003604 | -0.52890111  |
| 2084 | Uqcrfs1    | ENSMUSG00000038462 | -0.528921791 |
| 2085 | Myadml2    | ENSMUSG00000025141 | -0.52926663  |
| 2086 | Abl1       | ENSMUSG00000026842 | -0.529968934 |
| 2087 | Srpk2      | ENSMUSG00000062604 | -0.529979216 |
| 2088 | Ebf3       | ENSMUSG00000010476 | -0.530034174 |
| 2089 | Eif2b4     | ENSMUSG00000029145 | -0.530988001 |
| 2090 | Smpd1      | ENSMUSG00000037049 | -0.531888914 |
| 2091 | Txnrd2     | ENSMUSG00000075704 | -0.532002696 |
| 2092 | Neurl2     | ENSMUSG00000039873 | -0.532450604 |
| 2093 | Spr        | ENSMUSG00000033735 | -0.532878999 |
| 2094 | Rapgef2    | ENSMUSG00000062232 | -0.53305432  |
| 2095 | Reep1      | ENSMUSG00000052852 | -0.533747583 |
| 2096 | Repin1     | ENSMUSG00000052751 | -0.533887403 |
| 2097 | Clstn1     | ENSMUSG00000039953 | -0.534208261 |
| 2098 | Stat5b     | ENSMUSG00000020919 | -0.534617192 |
| 2099 | Ppp1r13b   | ENSMUSG00000021285 | -0.534709741 |
| 2100 | Gnb5       | ENSMUSG00000032192 | -0.534892236 |
| 2101 | Osbpl6     | ENSMUSG00000042359 | -0.534894054 |
| 2102 | Bphl       | ENSMUSG00000038286 | -0.535000413 |
| 2103 | Ppfibp2    | ENSMUSG00000036528 | -0.53649997  |
| 2104 | Grsf1      | ENSMUSG00000044221 | -0.537682027 |
| 2105 | Galt       | ENSMUSG00000036073 | -0.537758313 |
| 2106 | Egfl7      | ENSMUSG00000026921 | -0.538029436 |
| 2107 | Pik3r1     | ENSMUSG00000041417 | -0.538126723 |
| 2108 | Lamtor4    | ENSMUSG00000050552 | -0.53834156  |
| 2109 | Cdc14b     | ENSMUSG00000033102 | -0.538914089 |
| 2110 | Eif4e      | ENSMUSG00000028156 | -0.539936784 |
| 2111 | Cox14      | ENSMUSG00000023020 | -0.540267833 |



|      |               |                    |              |
|------|---------------|--------------------|--------------|
| 2112 | Casq2         | ENSMUSG00000027861 | -0.540519494 |
| 2113 | Tmed1         | ENSMUSG00000032180 | -0.540610932 |
| 2114 | Rorc          | ENSMUSG00000028150 | -0.540749298 |
| 2115 | Ctso          | ENSMUSG00000028015 | -0.541390369 |
| 2116 | Fcgrt         | ENSMUSG00000003420 | -0.541687569 |
| 2117 | 9030617O03Rik | ENSMUSG00000021185 | -0.541748808 |
| 2118 | Ccdc88c       | ENSMUSG00000021182 | -0.541849452 |
| 2119 | Fech          | ENSMUSG00000024588 | -0.54234129  |
| 2120 | Btbd1         | ENSMUSG00000025103 | -0.54238738  |
| 2121 | Naa38         | ENSMUSG00000059278 | -0.542578839 |
| 2122 | Hspa12b       | ENSMUSG00000074793 | -0.54258742  |
| 2123 | Pde1c         | ENSMUSG00000004347 | -0.542927201 |
| 2124 | Idh3b         | ENSMUSG00000027406 | -0.543102202 |
| 2125 | Uqcc3         | ENSMUSG00000071654 | -0.543214407 |
| 2126 | Ogdh          | ENSMUSG00000020456 | -0.543340957 |
| 2127 | Rbm20         | ENSMUSG00000043639 | -0.543644368 |
| 2128 | Clpp          | ENSMUSG00000002660 | -0.544902501 |
| 2129 | Haghl         | ENSMUSG00000061046 | -0.545113455 |
| 2130 | Smoc2         | ENSMUSG00000023886 | -0.545236467 |
| 2131 | Gid8          | ENSMUSG00000027573 | -0.545310605 |
| 2132 | Mal           | ENSMUSG00000027375 | -0.545362434 |
| 2133 | Rcbtb2        | ENSMUSG00000022106 | -0.54540507  |
| 2134 | Ndufb10       | ENSMUSG00000040048 | -0.545519229 |
| 2135 | Mcts2         | ENSMUSG00000042814 | -0.545826839 |
| 2136 | Mmab          | ENSMUSG00000029575 | -0.545909525 |
| 2137 | Stat5a        | ENSMUSG00000004043 | -0.546141328 |
| 2138 | Ndufb3        | ENSMUSG00000026032 | -0.547102483 |
| 2139 | Gnpat         | ENSMUSG00000031985 | -0.54808785  |
| 2140 | Fam117b       | ENSMUSG00000041040 | -0.548411002 |
| 2141 | Thtpa         | ENSMUSG00000045691 | -0.54986356  |
| 2142 | Prepl         | ENSMUSG00000024127 | -0.550011687 |
| 2143 | 1600014C10Rik | ENSMUSG00000054676 | -0.550415455 |
| 2144 | Trib2         | ENSMUSG00000020601 | -0.550737716 |
| 2145 | Angptl2       | ENSMUSG00000004105 | -0.550816393 |
| 2146 | Tmem126a      | ENSMUSG00000030615 | -0.551399718 |
| 2147 | Appl2         | ENSMUSG00000020263 | -0.551485075 |
| 2148 | Foxred1       | ENSMUSG00000039048 | -0.551843845 |
| 2149 | Ogfod3        | ENSMUSG00000025169 | -0.551923838 |
| 2150 | Sgo2a         | ENSMUSG00000026039 | -0.552513527 |
| 2151 | Mapk12        | ENSMUSG00000022610 | -0.554062557 |
| 2152 | Pde4d         | ENSMUSG00000021699 | -0.554099419 |
| 2153 | Nt5dc2        | ENSMUSG00000071547 | -0.554394438 |
| 2154 | Zfp383        | ENSMUSG00000099689 | -0.554564778 |
| 2155 | Hibadh        | ENSMUSG00000029776 | -0.555443412 |
| 2156 | Rsrp1         | ENSMUSG00000037266 | -0.555764673 |
| 2157 | Per2          | ENSMUSG0000005866  | -0.555989009 |
| 2158 | Erbp3         | ENSMUSG00000018166 | -0.556119327 |

|      |               |                     |              |
|------|---------------|---------------------|--------------|
| 2159 | Fam210a       | ENSMUSG00000038121  | -0.557004182 |
| 2160 | Bckdk         | ENSMUSG00000030802  | -0.55719579  |
| 2161 | Apex2         | ENSMUSG00000025269  | -0.557329763 |
| 2162 | Tmem204       | ENSMUSG00000024168  | -0.558046951 |
| 2163 | Pde7a         | ENSMUSG00000069094  | -0.558104739 |
| 2164 | Hmgb3         | ENSMUSG00000015217  | -0.558279602 |
| 2165 | Obsl1         | ENSMUSG00000026211  | -0.558335378 |
| 2166 | Mcrip2        | ENSMUSG00000025732  | -0.55983515  |
| 2167 | Map4k2        | ENSMUSG00000024948  | -0.560285933 |
| 2168 | 3110002H16Rik | ENSMUSG00000024410  | -0.560602784 |
| 2169 | Abraxas1      | ENSMUSG00000035234  | -0.56062947  |
| 2170 | Prps2         | ENSMUSG00000025742  | -0.561116802 |
| 2171 | Ramp2         | ENSMUSG00000001240  | -0.561222965 |
| 2172 | Tmcc3         | ENSMUSG00000020023  | -0.561740632 |
| 2173 | Slc5a6        | ENSMUSG00000006641  | -0.561791351 |
| 2174 | Uqcrc1        | ENSMUSG00000025651  | -0.561881474 |
| 2175 | Rhbdl3        | ENSMUSG00000017692  | -0.56280333  |
| 2176 | Exoc6         | ENSMUSG00000053799  | -0.56291617  |
| 2177 | Crybg1        | ENSMUSG00000019866  | -0.563655961 |
| 2178 | Klf15         | ENSMUSG00000030087  | -0.56372324  |
| 2179 | Pmvk          | ENSMUSG00000027952  | -0.563989817 |
| 2180 | Isca2         | ENSMUSG00000021241  | -0.564015297 |
| 2181 | Eci2          | ENSMUSG00000021417  | -0.564589924 |
| 2182 | Gm28661       | ENSMUSG000000102070 | -0.565481503 |
| 2183 | Cavin2        | ENSMUSG00000045954  | -0.566371611 |
| 2184 | Tspan13       | ENSMUSG00000020577  | -0.566547921 |
| 2185 | Scrn3         | ENSMUSG00000008226  | -0.566693655 |
| 2186 | Plcl2         | ENSMUSG00000038910  | -0.566896721 |
| 2187 | St6gal1       | ENSMUSG00000022885  | -0.566897048 |
| 2188 | Mtrf1         | ENSMUSG00000022022  | -0.567046144 |
| 2189 | Fem1a         | ENSMUSG00000043683  | -0.567077453 |
| 2190 | Klh7          | ENSMUSG00000028986  | -0.567231486 |
| 2191 | Sh3glb2       | ENSMUSG00000026860  | -0.567374889 |
| 2192 | Ppp1r9a       | ENSMUSG00000032827  | -0.567836766 |
| 2193 | Med12l        | ENSMUSG00000056476  | -0.567943216 |
| 2194 | Plcg1         | ENSMUSG00000016933  | -0.568154692 |
| 2195 | Tfpt          | ENSMUSG00000006335  | -0.568414535 |
| 2196 | Smim5         | ENSMUSG00000048442  | -0.569743728 |
| 2197 | Fam160a1      | ENSMUSG00000051000  | -0.569891918 |
| 2198 | Gm12251       | ENSMUSG000000084384 | -0.569923703 |
| 2199 | Rmdn1         | ENSMUSG00000028229  | -0.570146864 |
| 2200 | Tmem100       | ENSMUSG00000069763  | -0.57030649  |
| 2201 | Eif4e3        | ENSMUSG00000093661  | -0.570598574 |
| 2202 | Crebl2        | ENSMUSG00000032652  | -0.571324361 |
| 2203 | Myoz2         | ENSMUSG00000028116  | -0.571557304 |
| 2204 | Sdha          | ENSMUSG00000021577  | -0.571637663 |
| 2205 | Arhgef28      | ENSMUSG00000021662  | -0.572618452 |

|      |               |                     |              |
|------|---------------|---------------------|--------------|
| 2206 | Ralgapa2      | ENSMUSG00000037110  | -0.572716448 |
| 2207 | Med16         | ENSMUSG00000013833  | -0.572768246 |
| 2208 | Agap2         | ENSMUSG00000025422  | -0.574123746 |
| 2209 | Atpaf1        | ENSMUSG00000028710  | -0.574359824 |
| 2210 | Tmem94        | ENSMUSG00000020747  | -0.574475469 |
| 2211 | Psap          | ENSMUSG00000004207  | -0.575391273 |
| 2212 | 2510002D24Rik | ENSMUSG00000071632  | -0.575631521 |
| 2213 | Ndufs1        | ENSMUSG00000025968  | -0.575750009 |
| 2214 | Dcaf8         | ENSMUSG00000026554  | -0.575800509 |
| 2215 | Adck1         | ENSMUSG00000021044  | -0.576037786 |
| 2216 | Ndufs8        | ENSMUSG000000059734 | -0.576385352 |
| 2217 | Hsd17b4       | ENSMUSG00000024507  | -0.576874791 |
| 2218 | Cracr2b       | ENSMUSG00000048200  | -0.57753154  |
| 2219 | Casc4         | ENSMUSG00000060227  | -0.577820992 |
| 2220 | Cidea         | ENSMUSG00000024526  | -0.577898261 |
| 2221 | Cuedc2        | ENSMUSG00000036748  | -0.577917614 |
| 2222 | Dgka          | ENSMUSG00000025357  | -0.578016322 |
| 2223 | Em12          | ENSMUSG00000040811  | -0.579085629 |
| 2224 | Fzd4          | ENSMUSG00000049791  | -0.58034979  |
| 2225 | Senp7         | ENSMUSG00000052917  | -0.580575406 |
| 2226 | Zfp839        | ENSMUSG00000021271  | -0.580707371 |
| 2227 | Cdnf          | ENSMUSG00000039496  | -0.580774473 |
| 2228 | Abca5         | ENSMUSG00000018800  | -0.580794466 |
| 2229 | Letm1         | ENSMUSG00000005299  | -0.582496029 |
| 2230 | Prdx5         | ENSMUSG00000024953  | -0.582553782 |
| 2231 | Pick1         | ENSMUSG00000068206  | -0.583476211 |
| 2232 | Daam1         | ENSMUSG00000034574  | -0.583523287 |
| 2233 | Noa1          | ENSMUSG00000036285  | -0.583668444 |
| 2234 | Ndufa3        | ENSMUSG00000035674  | -0.583810545 |
| 2235 | Pdk1          | ENSMUSG00000006494  | -0.583994104 |
| 2236 | Ttc32         | ENSMUSG00000066637  | -0.584212965 |
| 2237 | Isoc1         | ENSMUSG00000024601  | -0.584740117 |
| 2238 | Hmcn1         | ENSMUSG00000066842  | -0.584744669 |
| 2239 | Asah2         | ENSMUSG00000024887  | -0.586012324 |
| 2240 | P3h4          | ENSMUSG00000006931  | -0.586113055 |
| 2241 | Rmdn2         | ENSMUSG00000036368  | -0.586367244 |
| 2242 | Coq5          | ENSMUSG00000041733  | -0.586455553 |
| 2243 | Hfe2          | ENSMUSG00000038403  | -0.586491918 |
| 2244 | Myom1         | ENSMUSG00000024049  | -0.586607712 |
| 2245 | Grb2          | ENSMUSG00000059923  | -0.586806076 |
| 2246 | Tspan7        | ENSMUSG00000058254  | -0.587006651 |
| 2247 | Pygm          | ENSMUSG00000032648  | -0.587081629 |
| 2248 | Itm2b         | ENSMUSG00000022108  | -0.587609213 |
| 2249 | Fgf16         | ENSMUSG00000031230  | -0.588741421 |
| 2250 | Ptcd3         | ENSMUSG00000063884  | -0.589003643 |
| 2251 | Fan1          | ENSMUSG00000033458  | -0.589569881 |
| 2252 | Cmss1         | ENSMUSG00000022748  | -0.589886955 |

|      |               |                    |              |
|------|---------------|--------------------|--------------|
| 2253 | Tnfaip8       | ENSMUSG00000062210 | -0.590070892 |
| 2254 | Endog         | ENSMUSG00000015337 | -0.59016548  |
| 2255 | Lrrc10        | ENSMUSG00000060187 | -0.591215565 |
| 2256 | Homer2        | ENSMUSG00000025813 | -0.591816045 |
| 2257 | Ulk1          | ENSMUSG00000029512 | -0.592098279 |
| 2258 | Ganc          | ENSMUSG00000062646 | -0.592254547 |
| 2259 | Meaf6         | ENSMUSG00000028863 | -0.592485427 |
| 2260 | Fam173a       | ENSMUSG00000057411 | -0.592574731 |
| 2261 | Chd1l         | ENSMUSG00000028089 | -0.593081602 |
| 2262 | Ntn1          | ENSMUSG00000020902 | -0.593110744 |
| 2263 | Atp2a3        | ENSMUSG00000020788 | -0.593955013 |
| 2264 | Htra1         | ENSMUSG00000006205 | -0.593997408 |
| 2265 | Cdh5          | ENSMUSG00000031871 | -0.594006866 |
| 2266 | Def8          | ENSMUSG00000001482 | -0.594596081 |
| 2267 | Akr7a5        | ENSMUSG00000028743 | -0.594801181 |
| 2268 | Mylip         | ENSMUSG00000038175 | -0.594942876 |
| 2269 | Egf           | ENSMUSG00000028017 | -0.59603806  |
| 2270 | Ctsf          | ENSMUSG00000083282 | -0.597437482 |
| 2271 | Paxx          | ENSMUSG00000047617 | -0.59802881  |
| 2272 | Entpd5        | ENSMUSG00000021236 | -0.598319679 |
| 2273 | Acyp2         | ENSMUSG00000060923 | -0.598495265 |
| 2274 | Pstk          | ENSMUSG00000063179 | -0.599137909 |
| 2275 | Myo10         | ENSMUSG00000022272 | -0.599210605 |
| 2276 | Pgm5          | ENSMUSG00000041731 | -0.599438032 |
| 2277 | F3            | ENSMUSG00000028128 | -0.599512712 |
| 2278 | Cyb5rl        | ENSMUSG00000028621 | -0.599536517 |
| 2279 | Ppfi1         | ENSMUSG00000037519 | -0.599879028 |
| 2280 | Gm28439       | ENSMUSG00000100131 | -0.599879451 |
| 2281 | Idua          | ENSMUSG00000033540 | -0.600712467 |
| 2282 | Gstt1         | ENSMUSG00000001663 | -0.600987363 |
| 2283 | Tcn2          | ENSMUSG00000020432 | -0.601166101 |
| 2284 | Mrpl34        | ENSMUSG00000034880 | -0.601461864 |
| 2285 | Osgep1        | ENSMUSG00000026096 | -0.602161945 |
| 2286 | Ap4s1         | ENSMUSG00000020955 | -0.602362898 |
| 2287 | Rnf166        | ENSMUSG00000014470 | -0.602610184 |
| 2288 | Adamts5       | ENSMUSG00000022894 | -0.60265657  |
| 2289 | Atp5a1        | ENSMUSG00000025428 | -0.602738117 |
| 2290 | Tatdn3        | ENSMUSG00000026632 | -0.603268224 |
| 2291 | Adamtsl4      | ENSMUSG00000015850 | -0.603337818 |
| 2292 | Il15ra        | ENSMUSG00000023206 | -0.603535482 |
| 2293 | Plekhb2       | ENSMUSG00000026123 | -0.603670394 |
| 2294 | 4430402118Rik | ENSMUSG00000064202 | -0.603740712 |
| 2295 | Ap5s1         | ENSMUSG00000068264 | -0.60393339  |
| 2296 | 1700020114Rik | ENSMUSG00000085438 | -0.604931782 |
| 2297 | Tmem140       | ENSMUSG00000057137 | -0.605726069 |
| 2298 | Bsg           | ENSMUSG00000023175 | -0.606022379 |
| 2299 | Serpinb6b     | ENSMUSG00000042842 | -0.606956036 |

|      |               |                    |              |
|------|---------------|--------------------|--------------|
| 2300 | mt-Nd4        | ENSMUSG00000064363 | -0.607146132 |
| 2301 | Zfp366        | ENSMUSG00000050919 | -0.607612805 |
| 2302 | Bche          | ENSMUSG00000027792 | -0.607984338 |
| 2303 | Abcc9         | ENSMUSG00000030249 | -0.609656213 |
| 2304 | Pdlim4        | ENSMUSG00000020388 | -0.609723532 |
| 2305 | Trpc3         | ENSMUSG00000027716 | -0.610083618 |
| 2306 | Dcakd         | ENSMUSG00000020935 | -0.610873386 |
| 2307 | Gm5421        | ENSMUSG00000097245 | -0.611967223 |
| 2308 | Aldh2         | ENSMUSG00000029455 | -0.612687306 |
| 2309 | Plekhh2       | ENSMUSG00000040852 | -0.61281517  |
| 2310 | Rab6b         | ENSMUSG00000032549 | -0.612858467 |
| 2311 | Ndufs2        | ENSMUSG00000013593 | -0.613461601 |
| 2312 | Stom          | ENSMUSG00000026880 | -0.613972711 |
| 2313 | Atg10         | ENSMUSG00000021619 | -0.614399769 |
| 2314 | Abtb1         | ENSMUSG00000030083 | -0.614970715 |
| 2315 | Ccdc85a       | ENSMUSG00000032878 | -0.615257439 |
| 2316 | Fbxo31        | ENSMUSG00000052934 | -0.615300647 |
| 2317 | 0610012G03Rik | ENSMUSG00000107002 | -0.615565015 |
| 2318 | Ptpnb         | ENSMUSG00000020154 | -0.616193965 |
| 2319 | Mrpl39        | ENSMUSG00000022889 | -0.61628961  |
| 2320 | Spry2         | ENSMUSG00000022114 | -0.616383611 |
| 2321 | Svil          | ENSMUSG00000024236 | -0.616632983 |
| 2322 | Mid1ip1       | ENSMUSG00000008035 | -0.616668051 |
| 2323 | S100a1        | ENSMUSG00000044080 | -0.617875878 |
| 2324 | Pex19         | ENSMUSG00000003464 | -0.617916784 |
| 2325 | Rassf9        | ENSMUSG00000044921 | -0.618119449 |
| 2326 | Mpst          | ENSMUSG00000071711 | -0.618843196 |
| 2327 | Apeh          | ENSMUSG00000032590 | -0.619613962 |
| 2328 | Lifr          | ENSMUSG00000054263 | -0.620152251 |
| 2329 | She           | ENSMUSG00000046280 | -0.62041167  |
| 2330 | Alkbh7        | ENSMUSG00000002661 | -0.620494678 |
| 2331 | Ano8          | ENSMUSG00000034863 | -0.621697864 |
| 2332 | Spaar         | ENSMUSG00000028475 | -0.621707606 |
| 2333 | Ppm1k         | ENSMUSG00000037826 | -0.622250599 |
| 2334 | Abca1         | ENSMUSG00000015243 | -0.622252325 |
| 2335 | Ndufaf1       | ENSMUSG00000027305 | -0.622352726 |
| 2336 | Lims2         | ENSMUSG00000024395 | -0.622817177 |
| 2337 | Fitm2         | ENSMUSG00000048486 | -0.623061042 |
| 2338 | Ccnd2         | ENSMUSG00000000184 | -0.623132618 |
| 2339 | Gramd1b       | ENSMUSG00000040111 | -0.623378429 |
| 2340 | Echdc2        | ENSMUSG00000028601 | -0.623697108 |
| 2341 | Fgfr3         | ENSMUSG00000054252 | -0.623769904 |
| 2342 | Nfia          | ENSMUSG00000028565 | -0.62405673  |
| 2343 | Mcf2l         | ENSMUSG00000031442 | -0.624077836 |
| 2344 | Caprin2       | ENSMUSG00000030309 | -0.624218285 |
| 2345 | Patz1         | ENSMUSG00000020453 | -0.624465891 |
| 2346 | Trim54        | ENSMUSG00000062077 | -0.624508715 |

|      |               |                    |              |
|------|---------------|--------------------|--------------|
| 2347 | Ddo           | ENSMUSG00000063428 | -0.624617482 |
| 2348 | Mreg          | ENSMUSG00000039395 | -0.624643211 |
| 2349 | Cyp2j6        | ENSMUSG00000052914 | -0.625129429 |
| 2350 | Nlrp10        | ENSMUSG00000049709 | -0.625685649 |
| 2351 | 1810011O10Rik | ENSMUSG00000056313 | -0.626632491 |
| 2352 | Zbtb14        | ENSMUSG00000049672 | -0.627700018 |
| 2353 | Nat6          | ENSMUSG00000079334 | -0.627833495 |
| 2354 | D10Jhu81e     | ENSMUSG00000053329 | -0.628350448 |
| 2355 | mt-Cytb       | ENSMUSG00000064370 | -0.628752121 |
| 2356 | Aldh1a1       | ENSMUSG00000053279 | -0.628773356 |
| 2357 | Mef2c         | ENSMUSG00000005583 | -0.628791461 |
| 2358 | Ubr2          | ENSMUSG00000023977 | -0.629311076 |
| 2359 | Mccc2         | ENSMUSG00000021646 | -0.629376737 |
| 2360 | Lymr9         | ENSMUSG00000072640 | -0.629556868 |
| 2361 | Paqr4         | ENSMUSG00000023909 | -0.629559624 |
| 2362 | mt-Nd1        | ENSMUSG00000064341 | -0.630145356 |
| 2363 | Epdr1         | ENSMUSG00000002808 | -0.630371804 |
| 2364 | Klhl23        | ENSMUSG00000042155 | -0.630506842 |
| 2365 | Ankrd9        | ENSMUSG00000037904 | -0.631064184 |
| 2366 | Serhl         | ENSMUSG00000058586 | -0.632630944 |
| 2367 | Sik3          | ENSMUSG00000034135 | -0.63313064  |
| 2368 | Adap2         | ENSMUSG00000020709 | -0.633161682 |
| 2369 | Kbtbd4        | ENSMUSG00000005505 | -0.633572073 |
| 2370 | Tmem182       | ENSMUSG00000079588 | -0.634084925 |
| 2371 | Sept4         | ENSMUSG00000020486 | -0.635144146 |
| 2372 | Ago4          | ENSMUSG00000042500 | -0.635268589 |
| 2373 | Sept6         | ENSMUSG00000050379 | -0.636250937 |
| 2374 | Usp11         | ENSMUSG00000031066 | -0.636641924 |
| 2375 | Rmnd1         | ENSMUSG00000019763 | -0.637072454 |
| 2376 | Clybl         | ENSMUSG00000025545 | -0.63707277  |
| 2377 | Gm38077       | ENSMUSG00000104344 | -0.637203272 |
| 2378 | Tmem106b      | ENSMUSG00000029571 | -0.637667576 |
| 2379 | Jag2          | ENSMUSG00000002799 | -0.637868338 |
| 2380 | Tppp          | ENSMUSG00000021573 | -0.63801285  |
| 2381 | Kif26a        | ENSMUSG00000021294 | -0.638531653 |
| 2382 | Hook1         | ENSMUSG00000028572 | -0.639098288 |
| 2383 | Gm16793       | ENSMUSG00000097357 | -0.639319523 |
| 2384 | Trim7         | ENSMUSG00000040350 | -0.639329032 |
| 2385 | C1qtnf9       | ENSMUSG00000071347 | -0.639813758 |
| 2386 | mt-Co3        | ENSMUSG00000064358 | -0.641376731 |
| 2387 | Epb41l3       | ENSMUSG00000024044 | -0.642210748 |
| 2388 | Rtn2          | ENSMUSG00000030401 | -0.642445364 |
| 2389 | Rasgrp3       | ENSMUSG00000071042 | -0.642462539 |
| 2390 | Kdr           | ENSMUSG00000062960 | -0.642972503 |
| 2391 | Gtf2i         | ENSMUSG00000060261 | -0.643498132 |
| 2392 | Lipe          | ENSMUSG00000003123 | -0.643876897 |
| 2393 | Slc12a7       | ENSMUSG00000017756 | -0.64447967  |



|      |               |                     |              |
|------|---------------|---------------------|--------------|
| 2394 | Lynx1         | ENSMUSG00000022594  | -0.644516872 |
| 2395 | Plcd3         | ENSMUSG00000020937  | -0.646104366 |
| 2396 | Rarg          | ENSMUSG00000001288  | -0.647628281 |
| 2397 | Tie1          | ENSMUSG000000033191 | -0.648217139 |
| 2398 | Nr3c2         | ENSMUSG000000031618 | -0.648454653 |
| 2399 | Cox7a1        | ENSMUSG000000074218 | -0.649466383 |
| 2400 | Ndufs3        | ENSMUSG00000005510  | -0.649718153 |
| 2401 | Myct1         | ENSMUSG000000046916 | -0.649835555 |
| 2402 | Gm31663       | ENSMUSG000000108994 | -0.649902664 |
| 2403 | Taco1         | ENSMUSG00000001983  | -0.650514111 |
| 2404 | Mfn1          | ENSMUSG000000027668 | -0.650535153 |
| 2405 | Inpp5e        | ENSMUSG000000026925 | -0.651807893 |
| 2406 | Aqp1          | ENSMUSG00000004655  | -0.65383584  |
| 2407 | Tmem135       | ENSMUSG000000039428 | -0.654776452 |
| 2408 | Atp8a1        | ENSMUSG000000037685 | -0.65619606  |
| 2409 | Cdkl2         | ENSMUSG000000029403 | -0.656212769 |
| 2410 | Zfp799        | ENSMUSG000000095253 | -0.656354874 |
| 2411 | Ipp           | ENSMUSG000000028696 | -0.656760507 |
| 2412 | Sync          | ENSMUSG000000001333 | -0.657297551 |
| 2413 | Adgrl3        | ENSMUSG000000037605 | -0.657299757 |
| 2414 | Cdh23         | ENSMUSG000000012819 | -0.658134068 |
| 2415 | Pank4         | ENSMUSG000000029056 | -0.658245758 |
| 2416 | Siae          | ENSMUSG000000001942 | -0.658763801 |
| 2417 | Slc28a2       | ENSMUSG000000027219 | -0.659977879 |
| 2418 | Amacr         | ENSMUSG000000022244 | -0.660230382 |
| 2419 | Zmym3         | ENSMUSG000000031310 | -0.660525683 |
| 2420 | Svip          | ENSMUSG000000074093 | -0.66063352  |
| 2421 | Idh1          | ENSMUSG000000025950 | -0.660666564 |
| 2422 | Atp5j         | ENSMUSG000000022890 | -0.660910403 |
| 2423 | Gstm1         | ENSMUSG000000058135 | -0.661135102 |
| 2424 | Srebf1        | ENSMUSG000000020538 | -0.661346976 |
| 2425 | Pcca          | ENSMUSG000000041650 | -0.66137414  |
| 2426 | Pex7          | ENSMUSG000000020003 | -0.661484054 |
| 2427 | Fdft1         | ENSMUSG000000021273 | -0.662377568 |
| 2428 | Tuba8         | ENSMUSG000000030137 | -0.663266428 |
| 2429 | Zfp606        | ENSMUSG000000030386 | -0.66386637  |
| 2430 | Mgme1         | ENSMUSG000000027424 | -0.664391236 |
| 2431 | Elmod3        | ENSMUSG000000056698 | -0.664545769 |
| 2432 | Peg13         | ENSMUSG000000106847 | -0.664975567 |
| 2433 | Fam213b       | ENSMUSG000000029059 | -0.665499246 |
| 2434 | Acsl6         | ENSMUSG000000020333 | -0.665987077 |
| 2435 | Zfp251        | ENSMUSG000000022526 | -0.666116511 |
| 2436 | Eepd1         | ENSMUSG000000036611 | -0.66616001  |
| 2437 | 6820402A03Rik | ENSMUSG000000103706 | -0.666189114 |
| 2438 | Thsd7a        | ENSMUSG000000032625 | -0.667371186 |
| 2439 | Ptcd1         | ENSMUSG000000029624 | -0.667993676 |
| 2440 | Fgf1          | ENSMUSG000000036585 | -0.668086446 |

|      |               |                     |              |
|------|---------------|---------------------|--------------|
| 2441 | Slc50a1       | ENSMUSG00000027953  | -0.668118588 |
| 2442 | Hic1          | ENSMUSG00000043099  | -0.668568445 |
| 2443 | Slc22a5       | ENSMUSG00000018900  | -0.669515278 |
| 2444 | Dtd1          | ENSMUSG00000027430  | -0.66974829  |
| 2445 | Rai2          | ENSMUSG00000043518  | -0.670077188 |
| 2446 | Asb13         | ENSMUSG00000033781  | -0.670132981 |
| 2447 | Oxct1         | ENSMUSG00000022186  | -0.670579592 |
| 2448 | Kcnn1         | ENSMUSG00000002908  | -0.670870269 |
| 2449 | Acox1         | ENSMUSG00000020777  | -0.671789499 |
| 2450 | Bmf           | ENSMUSG00000040093  | -0.674441763 |
| 2451 | Nudt6         | ENSMUSG00000050174  | -0.675516526 |
| 2452 | Sult1a1       | ENSMUSG00000030711  | -0.675957038 |
| 2453 | Epas1         | ENSMUSG00000024140  | -0.676261663 |
| 2454 | Hic2          | ENSMUSG00000050240  | -0.677667271 |
| 2455 | Sec31b        | ENSMUSG00000051984  | -0.6777256   |
| 2456 | Gfra1         | ENSMUSG00000025089  | -0.678475203 |
| 2457 | Slc25a10      | ENSMUSG00000025792  | -0.678907296 |
| 2458 | Gm17281       | ENSMUSG00000097317  | -0.678984092 |
| 2459 | Selenop       | ENSMUSG00000064373  | -0.678988602 |
| 2460 | Kcnn2         | ENSMUSG00000054477  | -0.680432324 |
| 2461 | Kcnj12        | ENSMUSG00000042529  | -0.680890738 |
| 2462 | Ppara         | ENSMUSG00000022383  | -0.681160384 |
| 2463 | Gpihbp1       | ENSMUSG00000022579  | -0.68161438  |
| 2464 | Oplah         | ENSMUSG00000022562  | -0.681680568 |
| 2465 | Slc25a22      | ENSMUSG00000019082  | -0.681770585 |
| 2466 | Phf24         | ENSMUSG00000036062  | -0.682006711 |
| 2467 | Egln1         | ENSMUSG00000031987  | -0.682408344 |
| 2468 | Aco2          | ENSMUSG00000022477  | -0.682804439 |
| 2469 | Dusp1         | ENSMUSG00000024190  | -0.683248224 |
| 2470 | Tnnt2         | ENSMUSG00000026414  | -0.683636278 |
| 2471 | Ptcd2         | ENSMUSG00000021650  | -0.683857648 |
| 2472 | Zfp970        | ENSMUSG00000078866  | -0.683984587 |
| 2473 | Peli2         | ENSMUSG00000021846  | -0.684062819 |
| 2474 | Gmnn          | ENSMUSG00000006715  | -0.684189806 |
| 2475 | Hs1bp3        | ENSMUSG00000020605  | -0.684333926 |
| 2476 | 8430408G22Rik | ENSMUSG00000048489  | -0.68433734  |
| 2477 | Rilpl1        | ENSMUSG00000029392  | -0.685770771 |
| 2478 | D2hgdh        | ENSMUSG00000073609  | -0.685801449 |
| 2479 | Ppa2          | ENSMUSG00000028013  | -0.686441494 |
| 2480 | Klh31         | ENSMUSG00000044938  | -0.687197946 |
| 2481 | Cd300lg       | ENSMUSG00000017309  | -0.687664327 |
| 2482 | Gpr27         | ENSMUSG00000072875  | -0.68854531  |
| 2483 | Prox1         | ENSMUSG00000010175  | -0.689321937 |
| 2484 | Gm44250       | ENSMUSG000000107881 | -0.689499761 |
| 2485 | Nmnat1        | ENSMUSG00000028992  | -0.689589093 |
| 2486 | Jarid2        | ENSMUSG00000038518  | -0.690179959 |
| 2487 | Ankrd29       | ENSMUSG00000057766  | -0.690868464 |

|      |               |                     |              |
|------|---------------|---------------------|--------------|
| 2488 | Pde8b         | ENSMUSG00000021684  | -0.690871512 |
| 2489 | Tecr          | ENSMUSG00000031708  | -0.691207984 |
| 2490 | Eci1          | ENSMUSG00000024132  | -0.692564361 |
| 2491 | Sdhaf4        | ENSMUSG00000026154  | -0.692825001 |
| 2492 | Pcdh12        | ENSMUSG00000024440  | -0.693594884 |
| 2493 | Maob          | ENSMUSG00000040147  | -0.693863012 |
| 2494 | Wfdc1         | ENSMUSG00000023336  | -0.694147029 |
| 2495 | Tmem38a       | ENSMUSG00000031791  | -0.694190603 |
| 2496 | Spsb1         | ENSMUSG00000039911  | -0.694889534 |
| 2497 | Pcyox1        | ENSMUSG00000029998  | -0.69499799  |
| 2498 | Zswim7        | ENSMUSG00000014243  | -0.695351856 |
| 2499 | Ushbp1        | ENSMUSG00000034911  | -0.695806688 |
| 2500 | Rnls          | ENSMUSG00000071573  | -0.695821433 |
| 2501 | Ablim1        | ENSMUSG00000025085  | -0.696309985 |
| 2502 | Zfp827        | ENSMUSG00000071064  | -0.696502693 |
| 2503 | Ndufab1       | ENSMUSG00000030869  | -0.696551859 |
| 2504 | Lrp5          | ENSMUSG00000024913  | -0.696833664 |
| 2505 | Ttc30b        | ENSMUSG00000075273  | -0.698535004 |
| 2506 | Aldh7a1       | ENSMUSG00000053644  | -0.698640225 |
| 2507 | Kcnj8         | ENSMUSG00000030247  | -0.699171701 |
| 2508 | Rasl10b       | ENSMUSG00000020684  | -0.700393113 |
| 2509 | Paox          | ENSMUSG00000025464  | -0.701810542 |
| 2510 | Plin4         | ENSMUSG00000002831  | -0.701917575 |
| 2511 | C1qtnf12      | ENSMUSG00000023571  | -0.703793243 |
| 2512 | Tmem44        | ENSMUSG00000022537  | -0.704467409 |
| 2513 | Gzmm          | ENSMUSG00000054206  | -0.704623032 |
| 2514 | Gm10718       | ENSMUSG000000095186 | -0.705433862 |
| 2515 | Syt7          | ENSMUSG00000024743  | -0.705823927 |
| 2516 | Tfdp2         | ENSMUSG00000032411  | -0.706039368 |
| 2517 | Scn4b         | ENSMUSG00000046480  | -0.706379455 |
| 2518 | Pcdhga2       | ENSMUSG00000103332  | -0.707522986 |
| 2519 | Gprc5c        | ENSMUSG00000051043  | -0.707719097 |
| 2520 | mt-Nd3        | ENSMUSG00000064360  | -0.709349661 |
| 2521 | Echs1         | ENSMUSG00000025465  | -0.709980846 |
| 2522 | Cirbp         | ENSMUSG00000045193  | -0.71033307  |
| 2523 | Zadh2         | ENSMUSG00000049090  | -0.710512304 |
| 2524 | Gstm2         | ENSMUSG00000040562  | -0.710708992 |
| 2525 | Efcab2        | ENSMUSG00000026495  | -0.712042064 |
| 2526 | Camk2n1       | ENSMUSG00000046447  | -0.712152072 |
| 2527 | Zfp30         | ENSMUSG00000047473  | -0.712641271 |
| 2528 | Apln          | ENSMUSG00000037010  | -0.713655903 |
| 2529 | Ppip5k2       | ENSMUSG00000040648  | -0.714230872 |
| 2530 | C130074G19Rik | ENSMUSG00000039349  | -0.714306655 |
| 2531 | Slc25a13      | ENSMUSG00000015112  | -0.714569207 |
| 2532 | Fabp4         | ENSMUSG00000062515  | -0.714831442 |
| 2533 | Gm14261       | ENSMUSG00000085322  | -0.714895226 |
| 2534 | Rgs4          | ENSMUSG00000038530  | -0.715066249 |

|      |               |                    |              |
|------|---------------|--------------------|--------------|
| 2535 | Crat          | ENSMUSG00000026853 | -0.716422069 |
| 2536 | Adgrf5        | ENSMUSG00000056492 | -0.717033467 |
| 2537 | Coq3          | ENSMUSG00000028247 | -0.717122404 |
| 2538 | Cox8b         | ENSMUSG00000025488 | -0.717363717 |
| 2539 | Scamp5        | ENSMUSG00000040722 | -0.718445314 |
| 2540 | Alad          | ENSMUSG00000028393 | -0.718929217 |
| 2541 | Mrps34        | ENSMUSG00000038880 | -0.719143077 |
| 2542 | Aldh5a1       | ENSMUSG00000035936 | -0.720139965 |
| 2543 | mt-Tt         | ENSMUSG00000064371 | -0.720428493 |
| 2544 | Sgcb          | ENSMUSG00000029156 | -0.720594515 |
| 2545 | Pomgnt2       | ENSMUSG00000066235 | -0.720795206 |
| 2546 | Btbd3         | ENSMUSG00000062098 | -0.720862004 |
| 2547 | Acbd4         | ENSMUSG00000056938 | -0.720929778 |
| 2548 | 1010001N08Rik | ENSMUSG00000097222 | -0.72110946  |
| 2549 | Fuz           | ENSMUSG00000011658 | -0.72122837  |
| 2550 | Suox          | ENSMUSG00000049858 | -0.722112765 |
| 2551 | Bbs10         | ENSMUSG00000035759 | -0.722258322 |
| 2552 | Erlec1        | ENSMUSG00000020311 | -0.72239425  |
| 2553 | Mrpl14        | ENSMUSG00000023939 | -0.722528921 |
| 2554 | Dll4          | ENSMUSG00000027314 | -0.722648159 |
| 2555 | Card10        | ENSMUSG00000033170 | -0.723010669 |
| 2556 | Gm10925       | ENSMUSG00000100862 | -0.7230275   |
| 2557 | Tmem110       | ENSMUSG00000006526 | -0.724584545 |
| 2558 | Clasp2        | ENSMUSG00000033392 | -0.725169753 |
| 2559 | Smarca2       | ENSMUSG00000024921 | -0.726387329 |
| 2560 | Ptgr2         | ENSMUSG00000072946 | -0.726456441 |
| 2561 | Mgl1          | ENSMUSG00000033174 | -0.726791001 |
| 2562 | Podxl2        | ENSMUSG00000033152 | -0.727560053 |
| 2563 | Chmp4c        | ENSMUSG00000027536 | -0.729854121 |
| 2564 | Pnpla7        | ENSMUSG00000036833 | -0.730157453 |
| 2565 | D830050J10Rik | ENSMUSG00000107994 | -0.73086899  |
| 2566 | Nudt16l1      | ENSMUSG00000022516 | -0.731272383 |
| 2567 | Macrod1       | ENSMUSG00000036278 | -0.731557102 |
| 2568 | Glt28d2       | ENSMUSG00000031286 | -0.732389934 |
| 2569 | Pyurf         | ENSMUSG00000043162 | -0.733408675 |
| 2570 | Abat          | ENSMUSG00000057880 | -0.73374244  |
| 2571 | Rasgrp2       | ENSMUSG00000032946 | -0.733785494 |
| 2572 | Fam78a        | ENSMUSG00000050592 | -0.733794225 |
| 2573 | Vtn           | ENSMUSG00000017344 | -0.734844016 |
| 2574 | Dok7          | ENSMUSG00000044716 | -0.734943827 |
| 2575 | Dsg2          | ENSMUSG00000044393 | -0.735091546 |
| 2576 | Srpk3         | ENSMUSG00000002007 | -0.735234808 |
| 2577 | Bckdhb        | ENSMUSG00000032263 | -0.735293564 |
| 2578 | Ndufs7        | ENSMUSG00000020153 | -0.735962895 |
| 2579 | Mrps35        | ENSMUSG00000040112 | -0.736204656 |
| 2580 | Mcee          | ENSMUSG00000033429 | -0.736440019 |
| 2581 | Pkdrej        | ENSMUSG00000052496 | -0.737349874 |

|      |               |                    |              |
|------|---------------|--------------------|--------------|
| 2582 | Abcd3         | ENSMUSG00000028127 | -0.737834501 |
| 2583 | Mpv17         | ENSMUSG00000107283 | -0.738197926 |
| 2584 | Fyco1         | ENSMUSG00000025241 | -0.738549394 |
| 2585 | Map3k5        | ENSMUSG00000071369 | -0.738753061 |
| 2586 | Tmem143       | ENSMUSG00000002781 | -0.738986725 |
| 2587 | Hspb3         | ENSMUSG00000051456 | -0.739118305 |
| 2588 | Cep112        | ENSMUSG00000020728 | -0.73932413  |
| 2589 | Myh6          | ENSMUSG00000040752 | -0.739876607 |
| 2590 | Snrk          | ENSMUSG00000038145 | -0.739884033 |
| 2591 | mt-Atp6       | ENSMUSG00000064357 | -0.740257904 |
| 2592 | Cnst          | ENSMUSG00000038949 | -0.740503336 |
| 2593 | Npc1          | ENSMUSG00000024413 | -0.741679415 |
| 2594 | Crocc         | ENSMUSG00000040860 | -0.743405824 |
| 2595 | Cdk5rap1      | ENSMUSG00000027487 | -0.743471282 |
| 2596 | Vldlr         | ENSMUSG00000024924 | -0.743540465 |
| 2597 | Trabd2b       | ENSMUSG00000070867 | -0.744158503 |
| 2598 | Cpeb3         | ENSMUSG00000039652 | -0.74449319  |
| 2599 | Prpf19        | ENSMUSG00000024735 | -0.744666247 |
| 2600 | Mettl7a1      | ENSMUSG00000054619 | -0.744932601 |
| 2601 | Camk2b        | ENSMUSG00000057897 | -0.745125641 |
| 2602 | Slc9a3r2      | ENSMUSG00000002504 | -0.745387429 |
| 2603 | Rpl3l         | ENSMUSG00000002500 | -0.745427334 |
| 2604 | Nmnat3        | ENSMUSG00000032456 | -0.745655725 |
| 2605 | Ric8b         | ENSMUSG00000035620 | -0.746236414 |
| 2606 | Dcaf4         | ENSMUSG00000021222 | -0.746482309 |
| 2607 | Cenpp         | ENSMUSG00000021391 | -0.746913297 |
| 2608 | Akap7         | ENSMUSG00000039166 | -0.747518484 |
| 2609 | Slc25a11      | ENSMUSG00000014606 | -0.748978497 |
| 2610 | Tmc7          | ENSMUSG00000042246 | -0.749229475 |
| 2611 | 0610009O20Rik | ENSMUSG00000024442 | -0.750003149 |
| 2612 | Cd36          | ENSMUSG00000002944 | -0.750182522 |
| 2613 | Prag1         | ENSMUSG00000050271 | -0.750503491 |
| 2614 | Sox18         | ENSMUSG00000046470 | -0.751310502 |
| 2615 | BC026585      | ENSMUSG00000033488 | -0.751508003 |
| 2616 | Lppos         | ENSMUSG00000097867 | -0.751539192 |
| 2617 | Vwa7          | ENSMUSG00000007030 | -0.751719346 |
| 2618 | Smpd2         | ENSMUSG00000019822 | -0.753299005 |
| 2619 | Cc2d2a        | ENSMUSG00000039765 | -0.754129807 |
| 2620 | BC029722      | ENSMUSG00000074649 | -0.754307684 |
| 2621 | Mgst3         | ENSMUSG00000026688 | -0.754382609 |
| 2622 | Abcb4         | ENSMUSG00000042476 | -0.755115237 |
| 2623 | Casp6         | ENSMUSG00000027997 | -0.755830956 |
| 2624 | Smim26        | ENSMUSG00000074754 | -0.756716004 |
| 2625 | Gm9755        | ENSMUSG00000030735 | -0.757322821 |
| 2626 | Art3          | ENSMUSG00000034842 | -0.758317218 |
| 2627 | Auh           | ENSMUSG00000021460 | -0.758686888 |
| 2628 | Acat1         | ENSMUSG00000032047 | -0.759665863 |

|      |          |                    |              |
|------|----------|--------------------|--------------|
| 2629 | Bend5    | ENSMUSG00000028545 | -0.759702467 |
| 2630 | Eml1     | ENSMUSG00000058070 | -0.760603288 |
| 2631 | Ivns1abp | ENSMUSG00000023150 | -0.760832473 |
| 2632 | Angpt1   | ENSMUSG00000022309 | -0.760950223 |
| 2633 | Zrsr1    | ENSMUSG00000044068 | -0.760977265 |
| 2634 | Emc9     | ENSMUSG00000022217 | -0.761720075 |
| 2635 | Gm43305  | ENSMUSG00000105703 | -0.762403486 |
| 2636 | Klhl32   | ENSMUSG00000040387 | -0.763651741 |
| 2637 | Ebpl     | ENSMUSG00000021928 | -0.763956553 |
| 2638 | Ak3      | ENSMUSG00000024782 | -0.766155859 |
| 2639 | Toporsos | ENSMUSG00000028407 | -0.766982618 |
| 2640 | Gm4459   | ENSMUSG00000083626 | -0.767074824 |
| 2641 | Pank1    | ENSMUSG00000033610 | -0.768053611 |
| 2642 | Sirt4    | ENSMUSG00000029524 | -0.768977383 |
| 2643 | Galc     | ENSMUSG00000021003 | -0.769507757 |
| 2644 | Pecr     | ENSMUSG00000026189 | -0.771947853 |
| 2645 | Aqp7     | ENSMUSG00000028427 | -0.772127676 |
| 2646 | Lyl1     | ENSMUSG00000034041 | -0.772349084 |
| 2647 | Gm26722  | ENSMUSG00000096944 | -0.774085326 |
| 2648 | Nim1k    | ENSMUSG00000095930 | -0.774826347 |
| 2649 | Acot13   | ENSMUSG00000006717 | -0.7769661   |
| 2650 | Tusc5    | ENSMUSG00000046275 | -0.777305481 |
| 2651 | Pex10    | ENSMUSG00000029047 | -0.778109738 |
| 2652 | Smtn     | ENSMUSG00000020439 | -0.778327266 |
| 2653 | Nexn     | ENSMUSG00000039103 | -0.779078102 |
| 2654 | Papln    | ENSMUSG00000021223 | -0.779079331 |
| 2655 | Fam214a  | ENSMUSG00000034858 | -0.779212284 |
| 2656 | Rapsn    | ENSMUSG00000002104 | -0.779222722 |
| 2657 | mt-Co2   | ENSMUSG00000064354 | -0.780598223 |
| 2658 | Abhd14b  | ENSMUSG00000042073 | -0.781088212 |
| 2659 | Higd1b   | ENSMUSG00000020928 | -0.781877654 |
| 2660 | Thbs2    | ENSMUSG00000023885 | -0.782058174 |
| 2661 | Bmp6     | ENSMUSG00000039004 | -0.783248168 |
| 2662 | Frmd5    | ENSMUSG00000027238 | -0.783529131 |
| 2663 | Rph3al   | ENSMUSG00000020847 | -0.784036647 |
| 2664 | Atp6v0e2 | ENSMUSG00000039347 | -0.784164147 |
| 2665 | Sirt5    | ENSMUSG00000054021 | -0.784197866 |
| 2666 | Rdm1     | ENSMUSG00000010362 | -0.786074333 |
| 2667 | Mrgprh   | ENSMUSG00000059408 | -0.786172689 |
| 2668 | Acsf3    | ENSMUSG00000015016 | -0.786485066 |
| 2669 | Pitpnc1  | ENSMUSG00000040430 | -0.786572263 |
| 2670 | Accs     | ENSMUSG00000040272 | -0.786864465 |
| 2671 | Colgalt2 | ENSMUSG00000032649 | -0.787138541 |
| 2672 | Rab3d    | ENSMUSG00000019066 | -0.787763935 |
| 2673 | Zfp810   | ENSMUSG00000066829 | -0.789687721 |
| 2674 | Hey1     | ENSMUSG00000040289 | -0.789793461 |
| 2675 | Gaa      | ENSMUSG00000025579 | -0.790272838 |



|      |           |                     |              |
|------|-----------|---------------------|--------------|
| 2676 | Pcbd2     | ENSMUSG00000021496  | -0.790535796 |
| 2677 | Myl3      | ENSMUSG00000059741  | -0.790557316 |
| 2678 | Gpr22     | ENSMUSG00000044067  | -0.792684389 |
| 2679 | Eid2b     | ENSMUSG00000070705  | -0.792885269 |
| 2680 | Sirt3     | ENSMUSG00000025486  | -0.79503448  |
| 2681 | Ddt       | ENSMUSG00000001666  | -0.79557787  |
| 2682 | Gpr155    | ENSMUSG00000041762  | -0.796807259 |
| 2683 | Sbk1      | ENSMUSG00000042978  | -0.798013751 |
| 2684 | Fkbp4     | ENSMUSG00000030357  | -0.798484943 |
| 2685 | Hdac9     | ENSMUSG00000004698  | -0.799487498 |
| 2686 | Pnpla2    | ENSMUSG00000025509  | -0.801503481 |
| 2687 | Rapgef4   | ENSMUSG00000049044  | -0.801816016 |
| 2688 | Mxi1      | ENSMUSG00000025025  | -0.801926641 |
| 2689 | Aldh9a1   | ENSMUSG00000026687  | -0.802127631 |
| 2690 | Klhdc8a   | ENSMUSG00000042115  | -0.802567579 |
| 2691 | Tcp11l2   | ENSMUSG00000020034  | -0.802610081 |
| 2692 | Ndufa4l2  | ENSMUSG00000040280  | -0.802746486 |
| 2693 | Nit2      | ENSMUSG00000022751  | -0.803530229 |
| 2694 | Sox7      | ENSMUSG00000063060  | -0.80473381  |
| 2695 | Arrdc2    | ENSMUSG00000002910  | -0.805654879 |
| 2696 | Abcb1a    | ENSMUSG00000040584  | -0.805927726 |
| 2697 | Gpd1      | ENSMUSG00000023019  | -0.805964347 |
| 2698 | Actc1     | ENSMUSG00000068614  | -0.806328421 |
| 2699 | Gpam      | ENSMUSG00000024978  | -0.806391322 |
| 2700 | Smarcd1   | ENSMUSG00000023018  | -0.806595261 |
| 2701 | Pcyt2     | ENSMUSG00000025137  | -0.806699774 |
| 2702 | Pla2g4e   | ENSMUSG00000050211  | -0.807634698 |
| 2703 | Slc2a12   | ENSMUSG00000037490  | -0.807807441 |
| 2704 | Rbm38     | ENSMUSG00000027510  | -0.80785213  |
| 2705 | Lrrc24    | ENSMUSG00000033707  | -0.808542049 |
| 2706 | Esrrg     | ENSMUSG00000026610  | -0.808884554 |
| 2707 | Dbt       | ENSMUSG00000000340  | -0.810246503 |
| 2708 | Dhrs7c    | ENSMUSG00000033044  | -0.810946823 |
| 2709 | Cbx7      | ENSMUSG00000053411  | -0.811664032 |
| 2710 | Adhfe1    | ENSMUSG00000025911  | -0.811684459 |
| 2711 | Hcn2      | ENSMUSG00000020331  | -0.812255728 |
| 2712 | Tnnc1     | ENSMUSG00000091898  | -0.812425737 |
| 2713 | Tril      | ENSMUSG00000043496  | -0.81326399  |
| 2714 | Anks1     | ENSMUSG00000024219  | -0.813784277 |
| 2715 | mt-Nd2    | ENSMUSG00000064345  | -0.813827546 |
| 2716 | Mybpc3    | ENSMUSG00000002100  | -0.813980241 |
| 2717 | Iqcc      | ENSMUSG00000040795  | -0.814297055 |
| 2718 | D3Ert751e | ENSMUSG00000025766  | -0.814693226 |
| 2719 | Etfrf1    | ENSMUSG00000040370  | -0.815309925 |
| 2720 | Snhg14    | ENSMUSG000000100826 | -0.815703021 |
| 2721 | Tufm      | ENSMUSG00000073838  | -0.816183515 |
| 2722 | Scarna17  | ENSMUSG00000088689  | -0.817632297 |

|      |               |                     |              |
|------|---------------|---------------------|--------------|
| 2723 | Yipf7         | ENSMUSG00000029158  | -0.818532027 |
| 2724 | Ehhadh        | ENSMUSG00000022853  | -0.818900418 |
| 2725 | Mccc1         | ENSMUSG00000027709  | -0.819068716 |
| 2726 | Me3           | ENSMUSG00000030621  | -0.819125088 |
| 2727 | BB218582      | ENSMUSG00000085218  | -0.819953002 |
| 2728 | Nr1d2         | ENSMUSG00000021775  | -0.821140955 |
| 2729 | Thnsl2        | ENSMUSG00000054474  | -0.821497746 |
| 2730 | Anapc13       | ENSMUSG00000035048  | -0.821614294 |
| 2731 | Vwa3a         | ENSMUSG00000030889  | -0.822289545 |
| 2732 | Gpr160        | ENSMUSG00000037661  | -0.822349811 |
| 2733 | Tmem150a      | ENSMUSG00000055912  | -0.82371951  |
| 2734 | Cdc42bpg      | ENSMUSG00000024769  | -0.823879398 |
| 2735 | Kbtbd3        | ENSMUSG00000025893  | -0.82396994  |
| 2736 | Gstp-ps       | ENSMUSG000000103653 | -0.82464889  |
| 2737 | Celsr2        | ENSMUSG00000068740  | -0.825309075 |
| 2738 | Fndc5         | ENSMUSG00000001334  | -0.825589261 |
| 2739 | Klh3          | ENSMUSG00000014164  | -0.827093792 |
| 2740 | Tst           | ENSMUSG00000044986  | -0.82730391  |
| 2741 | Gm13479       | ENSMUSG00000085591  | -0.82744395  |
| 2742 | Gm13910       | ENSMUSG00000063684  | -0.82746306  |
| 2743 | Rhot2         | ENSMUSG00000025733  | -0.827671361 |
| 2744 | Acad10        | ENSMUSG00000029456  | -0.82818379  |
| 2745 | Gm10602       | ENSMUSG00000073985  | -0.828270475 |
| 2746 | Ttc7          | ENSMUSG00000036918  | -0.828897734 |
| 2747 | Prr33         | ENSMUSG00000043795  | -0.829301308 |
| 2748 | Gm6652        | ENSMUSG00000099858  | -0.830246173 |
| 2749 | Prickle3      | ENSMUSG00000031145  | -0.83071083  |
| 2750 | Adra1a        | ENSMUSG00000045875  | -0.831774568 |
| 2751 | Acyp1         | ENSMUSG00000008822  | -0.832521689 |
| 2752 | 2310061I04Rik | ENSMUSG00000050705  | -0.833151162 |
| 2753 | Trmt5         | ENSMUSG00000034442  | -0.833888524 |
| 2754 | Ifngr2        | ENSMUSG00000022965  | -0.834340193 |
| 2755 | Tha1          | ENSMUSG00000017713  | -0.83437621  |
| 2756 | Abca6         | ENSMUSG00000044749  | -0.834427931 |
| 2757 | Pik3ip1       | ENSMUSG00000034614  | -0.837890987 |
| 2758 | Plxb1         | ENSMUSG00000053646  | -0.838896607 |
| 2759 | Ank1          | ENSMUSG00000031543  | -0.838927183 |
| 2760 | Slc26a10      | ENSMUSG00000040441  | -0.841428669 |
| 2761 | Car14         | ENSMUSG00000038526  | -0.84270873  |
| 2762 | Asb2          | ENSMUSG00000021200  | -0.843163445 |
| 2763 | Hrc           | ENSMUSG00000038239  | -0.84317812  |
| 2764 | Ighg2c        | ENSMUSG00000076612  | -0.843523497 |
| 2765 | Cadm4         | ENSMUSG00000054793  | -0.844054594 |
| 2766 | Grb14         | ENSMUSG00000026888  | -0.845131643 |
| 2767 | Igsf1         | ENSMUSG00000031111  | -0.847008554 |
| 2768 | Ednra         | ENSMUSG00000031616  | -0.847527316 |
| 2769 | Dpep1         | ENSMUSG00000019278  | -0.848259822 |

|      |               |                    |              |
|------|---------------|--------------------|--------------|
| 2770 | Cbr1          | ENSMUSG00000051483 | -0.848641508 |
| 2771 | C1qtnf2       | ENSMUSG00000046491 | -0.848993175 |
| 2772 | Zfand1        | ENSMUSG00000039795 | -0.849621801 |
| 2773 | Nipsnap2      | ENSMUSG00000029432 | -0.850592243 |
| 2774 | Fgf13         | ENSMUSG00000031137 | -0.852006682 |
| 2775 | Gdpd1         | ENSMUSG00000061666 | -0.852430106 |
| 2776 | Lmod3         | ENSMUSG00000044086 | -0.853231516 |
| 2777 | Rtn4ip1       | ENSMUSG00000019864 | -0.853236041 |
| 2778 | Cyp2d22       | ENSMUSG00000061740 | -0.853430381 |
| 2779 | Sord          | ENSMUSG00000027227 | -0.853819145 |
| 2780 | Hemk1         | ENSMUSG00000032579 | -0.85500593  |
| 2781 | Asb11         | ENSMUSG00000031382 | -0.85598189  |
| 2782 | Sdr39u1       | ENSMUSG00000022223 | -0.858542837 |
| 2783 | Epm2a         | ENSMUSG00000055493 | -0.858822742 |
| 2784 | Mettl26       | ENSMUSG00000025731 | -0.859351403 |
| 2785 | Nlr1          | ENSMUSG00000032109 | -0.859781875 |
| 2786 | C230035116Rik | ENSMUSG00000085024 | -0.860477821 |
| 2787 | Tstd3         | ENSMUSG00000028251 | -0.863467016 |
| 2788 | Acads         | ENSMUSG00000029545 | -0.86371654  |
| 2789 | Gm23119       | ENSMUSG00000089235 | -0.864298007 |
| 2790 | Hadhb         | ENSMUSG00000059447 | -0.866526662 |
| 2791 | Khk           | ENSMUSG00000029162 | -0.866706147 |
| 2792 | Slc36a2       | ENSMUSG00000020264 | -0.867425477 |
| 2793 | Smad9         | ENSMUSG00000027796 | -0.868440949 |
| 2794 | Mrpl49        | ENSMUSG00000007338 | -0.87036318  |
| 2795 | Hrasls        | ENSMUSG00000022525 | -0.870946666 |
| 2796 | Hspa12a       | ENSMUSG00000025092 | -0.872139853 |
| 2797 | Ttc21b        | ENSMUSG00000034848 | -0.872494533 |
| 2798 | Dusp7         | ENSMUSG00000053716 | -0.873463094 |
| 2799 | Pfkfb2        | ENSMUSG00000026409 | -0.87394991  |
| 2800 | Sh3rf2        | ENSMUSG00000057719 | -0.874447577 |
| 2801 | Etl4          | ENSMUSG00000036617 | -0.874576246 |
| 2802 | Fbxo21        | ENSMUSG00000032898 | -0.875205056 |
| 2803 | Hdhd5         | ENSMUSG00000058979 | -0.875542455 |
| 2804 | Pcsk6         | ENSMUSG00000030513 | -0.87580471  |
| 2805 | Usp2          | ENSMUSG00000032010 | -0.876552288 |
| 2806 | Asb15         | ENSMUSG00000029685 | -0.876727824 |
| 2807 | mt-Nd4l       | ENSMUSG00000065947 | -0.877120689 |
| 2808 | Gm38393       | ENSMUSG00000000948 | -0.87730952  |
| 2809 | Gm10800       | ENSMUSG00000075014 | -0.877731619 |
| 2810 | Kcnip2        | ENSMUSG00000025221 | -0.877865721 |
| 2811 | Tango2        | ENSMUSG00000013539 | -0.878500417 |
| 2812 | Asb5          | ENSMUSG00000031519 | -0.879472511 |
| 2813 | Myo5c         | ENSMUSG00000033590 | -0.880184446 |
| 2814 | Ankrd24       | ENSMUSG00000054708 | -0.880483077 |
| 2815 | Phyh          | ENSMUSG00000026664 | -0.881156947 |
| 2816 | Prickle1      | ENSMUSG00000036158 | -0.881386132 |

|      |               |                     |              |
|------|---------------|---------------------|--------------|
| 2817 | Ak1           | ENSMUSG00000026817  | -0.882281303 |
| 2818 | Igfbp6        | ENSMUSG00000023046  | -0.884497076 |
| 2819 | Grhpr         | ENSMUSG00000035637  | -0.887265881 |
| 2820 | Mmp15         | ENSMUSG00000031790  | -0.887919234 |
| 2821 | Rhobtb2       | ENSMUSG00000022075  | -0.888230243 |
| 2822 | Txlnb         | ENSMUSG00000039891  | -0.88964442  |
| 2823 | Timp4         | ENSMUSG00000030317  | -0.890229159 |
| 2824 | Hopx          | ENSMUSG00000059325  | -0.892712081 |
| 2825 | Ppif          | ENSMUSG00000021868  | -0.892765578 |
| 2826 | Setd6         | ENSMUSG00000031671  | -0.892962604 |
| 2827 | Cdk18         | ENSMUSG00000026437  | -0.893020603 |
| 2828 | Per3          | ENSMUSG00000028957  | -0.895496834 |
| 2829 | 4921531C22Rik | ENSMUSG00000085704  | -0.896194187 |
| 2830 | Mfap3l        | ENSMUSG00000031647  | -0.896692221 |
| 2831 | Scrn2         | ENSMUSG00000020877  | -0.897492124 |
| 2832 | Acadm         | ENSMUSG00000062908  | -0.897791284 |
| 2833 | Lrrc2         | ENSMUSG00000032495  | -0.901393006 |
| 2834 | Bcl7a         | ENSMUSG00000029438  | -0.901748448 |
| 2835 | Lurap1l       | ENSMUSG00000048706  | -0.902321076 |
| 2836 | Cpt1a         | ENSMUSG00000024900  | -0.902417988 |
| 2837 | Coq9          | ENSMUSG00000031782  | -0.903588172 |
| 2838 | Gal3st3       | ENSMUSG00000047658  | -0.904559582 |
| 2839 | Lrrc39        | ENSMUSG00000027961  | -0.904675463 |
| 2840 | Gm44220       | ENSMUSG000000107655 | -0.907405613 |
| 2841 | Gpsm1         | ENSMUSG00000026930  | -0.908202152 |
| 2842 | Lpl           | ENSMUSG00000015568  | -0.908351401 |
| 2843 | Dand5         | ENSMUSG00000053226  | -0.908622822 |
| 2844 | Stmn2         | ENSMUSG00000027500  | -0.909480017 |
| 2845 | Hsd17b11      | ENSMUSG00000029311  | -0.909819393 |
| 2846 | Gm10461       | ENSMUSG000000107277 | -0.909824707 |
| 2847 | Colec11       | ENSMUSG00000036655  | -0.91027753  |
| 2848 | Higd2a        | ENSMUSG00000025868  | -0.911223979 |
| 2849 | Pde4c         | ENSMUSG00000031842  | -0.911589434 |
| 2850 | Nudt14        | ENSMUSG00000002804  | -0.911669047 |
| 2851 | Inca1         | ENSMUSG00000057054  | -0.913738658 |
| 2852 | Plet1os       | ENSMUSG000000101304 | -0.915336161 |
| 2853 | Hlf           | ENSMUSG00000003949  | -0.915557847 |
| 2854 | Slc40a1       | ENSMUSG00000025993  | -0.918664253 |
| 2855 | Cpt1b         | ENSMUSG00000078937  | -0.919775589 |
| 2856 | Mme           | ENSMUSG00000027820  | -0.922523877 |
| 2857 | Jam2          | ENSMUSG00000053062  | -0.923211756 |
| 2858 | Gsta4         | ENSMUSG00000032348  | -0.925528534 |
| 2859 | Rnf144b       | ENSMUSG00000038068  | -0.927869013 |
| 2860 | Etfa          | ENSMUSG00000032314  | -0.928447357 |
| 2861 | Fam213a       | ENSMUSG00000021792  | -0.930009747 |
| 2862 | mt-Ti         | ENSMUSG00000064342  | -0.93067733  |
| 2863 | mt-Nd6        | ENSMUSG00000064368  | -0.931104975 |

|      |               |                    |              |
|------|---------------|--------------------|--------------|
| 2864 | Gm44386       | ENSMUSG00000107689 | -0.931894496 |
| 2865 | Lmo2          | ENSMUSG00000032698 | -0.932777063 |
| 2866 | Sobp          | ENSMUSG00000038248 | -0.933063875 |
| 2867 | Ldhd          | ENSMUSG00000031958 | -0.933350141 |
| 2868 | Atp1b2        | ENSMUSG00000041329 | -0.934700712 |
| 2869 | AU021092      | ENSMUSG00000051669 | -0.937918233 |
| 2870 | Ckm           | ENSMUSG00000030399 | -0.93816446  |
| 2871 | Slc25a33      | ENSMUSG00000028982 | -0.9402885   |
| 2872 | Fam228b       | ENSMUSG00000050545 | -0.940775714 |
| 2873 | Fam81a        | ENSMUSG00000032224 | -0.941465985 |
| 2874 | 5430431A17Rik | ENSMUSG00000108322 | -0.941737365 |
| 2875 | Il2ra         | ENSMUSG00000026770 | -0.942288619 |
| 2876 | Tarsl2        | ENSMUSG00000030515 | -0.943537175 |
| 2877 | 4632428C04Rik | ENSMUSG00000097184 | -0.945595775 |
| 2878 | Unc119        | ENSMUSG00000002058 | -0.949090283 |
| 2879 | Sv2a          | ENSMUSG00000038486 | -0.950702636 |
| 2880 | Acot11        | ENSMUSG00000034853 | -0.950965714 |
| 2881 | Tmem71        | ENSMUSG00000036944 | -0.951169612 |
| 2882 | Acadvl        | ENSMUSG00000018574 | -0.951280633 |
| 2883 | Gm33609       | ENSMUSG00000104736 | -0.951720598 |
| 2884 | Gm40457       | ENSMUSG00000108626 | -0.952372978 |
| 2885 | Ptpn3         | ENSMUSG00000038764 | -0.952770283 |
| 2886 | Art5          | ENSMUSG00000070424 | -0.953880012 |
| 2887 | Adi1          | ENSMUSG00000020629 | -0.954935021 |
| 2888 | Adamts7       | ENSMUSG00000032363 | -0.956271344 |
| 2889 | Slc46a1       | ENSMUSG00000020829 | -0.956634929 |
| 2890 | Acad11        | ENSMUSG00000090150 | -0.957106991 |
| 2891 | Nampt         | ENSMUSG00000020572 | -0.957162533 |
| 2892 | Neil2         | ENSMUSG00000035121 | -0.957934306 |
| 2893 | 4633401B06Rik | ENSMUSG00000105597 | -0.958711109 |
| 2894 | Zfp791        | ENSMUSG00000074194 | -0.960926562 |
| 2895 | Nqo2          | ENSMUSG00000046949 | -0.962732676 |
| 2896 | Cyp27a1       | ENSMUSG00000026170 | -0.963398309 |
| 2897 | Nat8l         | ENSMUSG00000048142 | -0.964304504 |
| 2898 | Sgca          | ENSMUSG00000001508 | -0.964751244 |
| 2899 | Tnip3         | ENSMUSG00000044162 | -0.965612186 |
| 2900 | Plbd1         | ENSMUSG00000030214 | -0.969094937 |
| 2901 | Gm45206       | ENSMUSG00000108389 | -0.971268422 |
| 2902 | Lrp3          | ENSMUSG00000001802 | -0.971712724 |
| 2903 | Nr0b2         | ENSMUSG00000037583 | -0.971731496 |
| 2904 | Ttc38         | ENSMUSG00000035944 | -0.973692559 |
| 2905 | Exoc3l4       | ENSMUSG00000021280 | -0.97422634  |
| 2906 | Glul          | ENSMUSG00000026473 | -0.974400932 |
| 2907 | L3hypdh       | ENSMUSG00000019718 | -0.974488828 |
| 2908 | Optn          | ENSMUSG00000026672 | -0.974648007 |
| 2909 | Sh3d21        | ENSMUSG00000073758 | -0.976004393 |
| 2910 | 2310040G24Rik | ENSMUSG00000101655 | -0.9776137   |

|      |               |                    |              |
|------|---------------|--------------------|--------------|
| 2911 | Cmbl          | ENSMUSG00000022235 | -0.978806029 |
| 2912 | Impa2         | ENSMUSG00000024525 | -0.979310612 |
| 2913 | Akr1b10       | ENSMUSG00000061758 | -0.979513983 |
| 2914 | Apc2          | ENSMUSG00000020135 | -0.979782053 |
| 2915 | Slc22a3       | ENSMUSG00000023828 | -0.98242249  |
| 2916 | Hdac11        | ENSMUSG00000034245 | -0.982675759 |
| 2917 | Retreg1       | ENSMUSG00000022270 | -0.983179656 |
| 2918 | 2310039L15Rik | ENSMUSG00000100550 | -0.983477268 |
| 2919 | Btnl9         | ENSMUSG00000040283 | -0.984495261 |
| 2920 | Mitf          | ENSMUSG00000035158 | -0.985274263 |
| 2921 | Gm43288       | ENSMUSG00000106220 | -0.986173465 |
| 2922 | Gm37691       | ENSMUSG00000104348 | -0.987647578 |
| 2923 | Nrg2          | ENSMUSG00000060275 | -0.9878458   |
| 2924 | Cep128        | ENSMUSG00000061533 | -0.988840525 |
| 2925 | Scara5        | ENSMUSG00000022032 | -0.990524464 |
| 2926 | Plin3         | ENSMUSG00000024197 | -0.991344724 |
| 2927 | Gpr157        | ENSMUSG00000047875 | -0.991543849 |
| 2928 | Scn4a         | ENSMUSG00000001027 | -0.992162729 |
| 2929 | Mtfp1         | ENSMUSG00000004748 | -0.992563111 |
| 2930 | Gm20712       | ENSMUSG00000093677 | -0.992852849 |
| 2931 | Cpxm2         | ENSMUSG00000030862 | -0.995825171 |
| 2932 | Ankrd35       | ENSMUSG00000038354 | -0.995973091 |
| 2933 | Whrn          | ENSMUSG00000039137 | -0.996383244 |
| 2934 | Oxld1         | ENSMUSG00000039670 | -0.996621904 |
| 2935 | 2310069G16Rik | ENSMUSG00000097102 | -0.996914287 |
| 2936 | Gm11899       | ENSMUSG00000087399 | -0.99920021  |
| 2937 | Acsl1         | ENSMUSG00000018796 | -0.999476453 |
| 2938 | Gm43050       | ENSMUSG00000106795 | -1.00051903  |
| 2939 | Osbp2         | ENSMUSG00000020435 | -1.001347132 |
| 2940 | Cxx1c         | ENSMUSG00000051851 | -1.003518841 |
| 2941 | Fstl4         | ENSMUSG00000036264 | -1.004906968 |
| 2942 | Tef           | ENSMUSG00000022389 | -1.007327474 |
| 2943 | Zfp133-ps     | ENSMUSG00000083674 | -1.008262489 |
| 2944 | Gm7889        | ENSMUSG00000099624 | -1.010052315 |
| 2945 | Gm19461       | ENSMUSG00000101693 | -1.011725335 |
| 2946 | Adam11        | ENSMUSG00000020926 | -1.012923867 |
| 2947 | Gpcpd1        | ENSMUSG00000027346 | -1.012946203 |
| 2948 | D630003M21Rik | ENSMUSG00000037813 | -1.013110658 |
| 2949 | Gstt2         | ENSMUSG00000033318 | -1.013144454 |
| 2950 | Hadha         | ENSMUSG00000025745 | -1.013688305 |
| 2951 | Cux2          | ENSMUSG00000042589 | -1.013722447 |
| 2952 | Fmo5          | ENSMUSG00000028088 | -1.014078015 |
| 2953 | Pm20d2        | ENSMUSG00000054659 | -1.014437199 |
| 2954 | Gnmt          | ENSMUSG00000002769 | -1.014646858 |
| 2955 | 1110034G24Rik | ENSMUSG00000044991 | -1.015035925 |
| 2956 | Gstp1         | ENSMUSG00000060803 | -1.015527288 |
| 2957 | Il10rb        | ENSMUSG00000022969 | -1.015903371 |



|      |               |                    |              |
|------|---------------|--------------------|--------------|
| 2958 | Vwa8          | ENSMUSG00000058997 | -1.019871529 |
| 2959 | 9330162012Rik | ENSMUSG00000086448 | -1.021000503 |
| 2960 | Gm10435       | ENSMUSG00000072902 | -1.021844174 |
| 2961 | Gm43389       | ENSMUSG00000106665 | -1.022471531 |
| 2962 | Gm45203       | ENSMUSG00000108494 | -1.022852343 |
| 2963 | Zfp934        | ENSMUSG00000074865 | -1.022913935 |
| 2964 | Bri3          | ENSMUSG00000047843 | -1.023056606 |
| 2965 | Gm14403       | ENSMUSG00000094786 | -1.025311153 |
| 2966 | Gper1         | ENSMUSG00000053647 | -1.02689718  |
| 2967 | Cdkn1c        | ENSMUSG00000037664 | -1.027042013 |
| 2968 | Fsd2          | ENSMUSG00000038663 | -1.028381935 |
| 2969 | Acadl         | ENSMUSG00000026003 | -1.02937998  |
| 2970 | Cds1          | ENSMUSG00000029330 | -1.029440128 |
| 2971 | Galm          | ENSMUSG00000035473 | -1.029656305 |
| 2972 | Mblac2        | ENSMUSG00000051098 | -1.030427392 |
| 2973 | Dhdh          | ENSMUSG00000011382 | -1.031542094 |
| 2974 | Gm45012       | ENSMUSG00000109052 | -1.036433992 |
| 2975 | Gm42568       | ENSMUSG00000103703 | -1.037766164 |
| 2976 | Acacb         | ENSMUSG00000042010 | -1.042600338 |
| 2977 | Rasl2-9       | ENSMUSG00000083649 | -1.04519485  |
| 2978 | Dut           | ENSMUSG00000027203 | -1.045216758 |
| 2979 | 0610040J01Rik | ENSMUSG00000060512 | -1.046029335 |
| 2980 | Gm5532        | ENSMUSG00000073535 | -1.046366906 |
| 2981 | Fam69b        | ENSMUSG00000036186 | -1.046657605 |
| 2982 | Mif4gd        | ENSMUSG00000020743 | -1.048510346 |
| 2983 | Ggnbp1        | ENSMUSG00000048731 | -1.048886547 |
| 2984 | Hsd12         | ENSMUSG00000028383 | -1.052403212 |
| 2985 | Tcf15         | ENSMUSG00000068079 | -1.054316753 |
| 2986 | Gck           | ENSMUSG00000041798 | -1.054429563 |
| 2987 | Nudt7         | ENSMUSG00000031767 | -1.054560606 |
| 2988 | Vamp5         | ENSMUSG00000073002 | -1.055082504 |
| 2989 | 4933431K23Rik | ENSMUSG00000086451 | -1.056770752 |
| 2990 | Tmem266       | ENSMUSG00000032313 | -1.056874166 |
| 2991 | Zfp612        | ENSMUSG00000044676 | -1.058287295 |
| 2992 | Lbh           | ENSMUSG00000024063 | -1.062575114 |
| 2993 | Gm14327       | ENSMUSG00000074521 | -1.063729109 |
| 2994 | mt-Tp         | ENSMUSG00000064372 | -1.064094033 |
| 2995 | Mlycd         | ENSMUSG00000074064 | -1.064314435 |
| 2996 | Klhl38        | ENSMUSG00000022357 | -1.066499302 |
| 2997 | Fam229b       | ENSMUSG00000051736 | -1.06813419  |
| 2998 | Gm44949       | ENSMUSG00000108655 | -1.070894839 |
| 2999 | Ccdc141       | ENSMUSG00000044033 | -1.071334785 |
| 3000 | Osbp13        | ENSMUSG00000029822 | -1.071369944 |
| 3001 | Asrg11        | ENSMUSG00000024654 | -1.071606102 |
| 3002 | Kyat1         | ENSMUSG00000039648 | -1.072370642 |
| 3003 | A530013C23Rik | ENSMUSG00000006462 | -1.072410593 |
| 3004 | Myzap         | ENSMUSG00000041361 | -1.073298516 |

|      |               |                    |              |
|------|---------------|--------------------|--------------|
| 3005 | Nrg1          | ENSMUSG00000062991 | -1.07430495  |
| 3006 | Ephx2         | ENSMUSG00000022040 | -1.076550456 |
| 3007 | Gstk1         | ENSMUSG00000029864 | -1.077075901 |
| 3008 | Naprt         | ENSMUSG00000022574 | -1.077579958 |
| 3009 | A430046D13Rik | ENSMUSG00000097353 | -1.07782994  |
| 3010 | Sesn1         | ENSMUSG00000038332 | -1.078562235 |
| 3011 | Gm44421       | ENSMUSG00000107451 | -1.079272861 |
| 3012 | Amy1          | ENSMUSG00000074264 | -1.079929831 |
| 3013 | Ano4          | ENSMUSG00000035189 | -1.081642566 |
| 3014 | Fahd2a        | ENSMUSG00000027371 | -1.081780336 |
| 3015 | mt-Rnr2       | ENSMUSG00000064339 | -1.08216366  |
| 3016 | Lgi1          | ENSMUSG00000067242 | -1.082756169 |
| 3017 | Sema3b        | ENSMUSG00000057969 | -1.083197213 |
| 3018 | Tcap          | ENSMUSG00000007877 | -1.083463945 |
| 3019 | Idh2          | ENSMUSG00000030541 | -1.084701281 |
| 3020 | mt-Tw         | ENSMUSG00000064346 | -1.087442409 |
| 3021 | Acaa2         | ENSMUSG00000036880 | -1.088062756 |
| 3022 | Gm3646        | ENSMUSG00000091937 | -1.089192401 |
| 3023 | Ace2          | ENSMUSG00000015405 | -1.089199488 |
| 3024 | Hhatl         | ENSMUSG00000032523 | -1.090321835 |
| 3025 | Tesc          | ENSMUSG00000029359 | -1.091053216 |
| 3026 | Gm20186       | ENSMUSG00000106874 | -1.092476899 |
| 3027 | 3425401B19Rik | ENSMUSG00000071540 | -1.095134825 |
| 3028 | Pln           | ENSMUSG00000038583 | -1.095582809 |
| 3029 | Hs3st5        | ENSMUSG00000044499 | -1.096291803 |
| 3030 | Retsat        | ENSMUSG00000056666 | -1.099116341 |
| 3031 | Dhrs4         | ENSMUSG00000022210 | -1.102827166 |
| 3032 | Dpysl4        | ENSMUSG00000025478 | -1.102956308 |
| 3033 | Car4          | ENSMUSG00000000805 | -1.104007528 |
| 3034 | Mb            | ENSMUSG00000018893 | -1.105490432 |
| 3035 | Selenbp1      | ENSMUSG00000068874 | -1.108493119 |
| 3036 | Fbxo44        | ENSMUSG00000029001 | -1.109371327 |
| 3037 | Pfkm          | ENSMUSG00000033065 | -1.109724719 |
| 3038 | Peli3         | ENSMUSG00000024901 | -1.110707862 |
| 3039 | 6430573F11Rik | ENSMUSG00000039620 | -1.113472696 |
| 3040 | Celsr1        | ENSMUSG00000016028 | -1.113678402 |
| 3041 | Fblim1        | ENSMUSG00000006219 | -1.114194993 |
| 3042 | Klhdc1        | ENSMUSG00000051890 | -1.115614331 |
| 3043 | Accs1         | ENSMUSG00000027452 | -1.116309317 |
| 3044 | Dgat2         | ENSMUSG00000030747 | -1.116341081 |
| 3045 | Bckdha        | ENSMUSG00000060376 | -1.117683661 |
| 3046 | Rxrg          | ENSMUSG00000015843 | -1.118586113 |
| 3047 | Myot          | ENSMUSG00000024471 | -1.119671173 |
| 3048 | Dbp           | ENSMUSG00000059824 | -1.120104998 |
| 3049 | Bcl11a        | ENSMUSG00000000861 | -1.120801394 |
| 3050 | 1700123M08Rik | ENSMUSG00000085614 | -1.126677328 |
| 3051 | Cd59b         | ENSMUSG00000068686 | -1.127338543 |

|      |               |                    |              |
|------|---------------|--------------------|--------------|
| 3052 | Slc27a1       | ENSMUSG00000031808 | -1.128374228 |
| 3053 | Etfdh         | ENSMUSG00000027809 | -1.129099485 |
| 3054 | Itgb1bp2      | ENSMUSG00000031312 | -1.129564361 |
| 3055 | Hnmt          | ENSMUSG00000026986 | -1.129850214 |
| 3056 | Msrp2         | ENSMUSG00000023094 | -1.130511119 |
| 3057 | Adra2b        | ENSMUSG00000058620 | -1.130953137 |
| 3058 | Gm15543       | ENSMUSG00000086863 | -1.131607026 |
| 3059 | Carmil3       | ENSMUSG00000022211 | -1.134805775 |
| 3060 | Pnmal2        | ENSMUSG00000070802 | -1.137119937 |
| 3061 | Bcl11b        | ENSMUSG00000048251 | -1.137896146 |
| 3062 | Prodh         | ENSMUSG00000003526 | -1.139746748 |
| 3063 | Atcayos       | ENSMUSG00000085779 | -1.141887338 |
| 3064 | Gm42418       | ENSMUSG00000098178 | -1.143004231 |
| 3065 | Slc25a42      | ENSMUSG00000002346 | -1.143080285 |
| 3066 | Gm31105       | ENSMUSG00000109587 | -1.143691648 |
| 3067 | Lsmem1        | ENSMUSG00000071342 | -1.145498353 |
| 3068 | Wnk2          | ENSMUSG00000037989 | -1.145530672 |
| 3069 | Asb10         | ENSMUSG00000038204 | -1.145735722 |
| 3070 | Ppargc1a      | ENSMUSG00000029167 | -1.147367226 |
| 3071 | Grm1          | ENSMUSG00000019828 | -1.148561434 |
| 3072 | Map2k6        | ENSMUSG00000020623 | -1.148884904 |
| 3073 | Gpt           | ENSMUSG00000022546 | -1.149324244 |
| 3074 | Spata33       | ENSMUSG00000048478 | -1.151483501 |
| 3075 | Irx4          | ENSMUSG00000021604 | -1.151963632 |
| 3076 | Gm37829       | ENSMUSG00000104453 | -1.153922176 |
| 3077 | Art4          | ENSMUSG00000030217 | -1.155633092 |
| 3078 | Ciart         | ENSMUSG00000038550 | -1.156445194 |
| 3079 | Acsf2         | ENSMUSG00000076435 | -1.159362105 |
| 3080 | Tcea3         | ENSMUSG00000001604 | -1.160441522 |
| 3081 | Grhl2         | ENSMUSG00000022286 | -1.161023386 |
| 3082 | Art1          | ENSMUSG00000030996 | -1.161026363 |
| 3083 | Mir133a-1hg   | ENSMUSG00000095438 | -1.161070715 |
| 3084 | Hadh          | ENSMUSG00000027984 | -1.1647778   |
| 3085 | Gpld1         | ENSMUSG00000021340 | -1.16508171  |
| 3086 | Lmod2         | ENSMUSG00000029683 | -1.166283518 |
| 3087 | Ripply3       | ENSMUSG00000022941 | -1.168470374 |
| 3088 | Clcn1         | ENSMUSG00000029862 | -1.16859351  |
| 3089 | D830039M14Rik | ENSMUSG00000043126 | -1.170441555 |
| 3090 | Decr1         | ENSMUSG00000028223 | -1.170808345 |
| 3091 | G0s2          | ENSMUSG00000009633 | -1.173743664 |
| 3092 | Pex11a        | ENSMUSG00000030545 | -1.174261513 |
| 3093 | Fam131a       | ENSMUSG00000050821 | -1.177724473 |
| 3094 | Adss1         | ENSMUSG00000011148 | -1.178539024 |
| 3095 | Masp1         | ENSMUSG00000022887 | -1.181926604 |
| 3096 | Ubxn10        | ENSMUSG00000043621 | -1.183131487 |
| 3097 | Prr29         | ENSMUSG00000009210 | -1.183153469 |
| 3098 | Fgf9          | ENSMUSG00000021974 | -1.183912651 |

|      |               |                    |              |
|------|---------------|--------------------|--------------|
| 3099 | Perm1         | ENSMUSG00000078486 | -1.184081299 |
| 3100 | Gpat3         | ENSMUSG00000029314 | -1.184513647 |
| 3101 | Atp1a2        | ENSMUSG00000007097 | -1.18603222  |
| 3102 | Txnip         | ENSMUSG00000038393 | -1.1903996   |
| 3103 | Ctf1          | ENSMUSG00000042340 | -1.190788769 |
| 3104 | Gm5514        | ENSMUSG00000045104 | -1.190835358 |
| 3105 | Cutc          | ENSMUSG00000025193 | -1.191014933 |
| 3106 | Dhtkd1        | ENSMUSG00000025815 | -1.193470072 |
| 3107 | Lonrf2        | ENSMUSG00000048814 | -1.194049943 |
| 3108 | Abhd18        | ENSMUSG00000037818 | -1.194127651 |
| 3109 | Coro6         | ENSMUSG00000020836 | -1.194972633 |
| 3110 | Pdzd3         | ENSMUSG00000032105 | -1.197816904 |
| 3111 | Tbc1d10c      | ENSMUSG00000040247 | -1.19855164  |
| 3112 | Tmem150c      | ENSMUSG00000050640 | -1.199658439 |
| 3113 | Dnah7b        | ENSMUSG00000041144 | -1.200674102 |
| 3114 | Rragb         | ENSMUSG00000041658 | -1.201058563 |
| 3115 | Frem2         | ENSMUSG00000037016 | -1.201861415 |
| 3116 | Rnf207        | ENSMUSG00000058498 | -1.204774423 |
| 3117 | Rbp7          | ENSMUSG00000028996 | -1.204832761 |
| 3118 | Slc7a4        | ENSMUSG00000022756 | -1.205300042 |
| 3119 | Gm9903        | ENSMUSG00000097271 | -1.209571345 |
| 3120 | CN725425      | ENSMUSG00000078932 | -1.21072226  |
| 3121 | Gm14703       | ENSMUSG00000087644 | -1.212980197 |
| 3122 | Kcnj11        | ENSMUSG00000096146 | -1.215461486 |
| 3123 | Mterf2        | ENSMUSG00000049038 | -1.215741322 |
| 3124 | Lrrc14b       | ENSMUSG00000021579 | -1.217240755 |
| 3125 | Kbtbd13       | ENSMUSG00000054978 | -1.217928373 |
| 3126 | Asb14         | ENSMUSG00000021898 | -1.22249016  |
| 3127 | 1700040L02Rik | ENSMUSG00000019945 | -1.226527603 |
| 3128 | A930018M24Rik | ENSMUSG00000091089 | -1.22686898  |
| 3129 | Paqr7         | ENSMUSG00000037348 | -1.227742628 |
| 3130 | Efnb3         | ENSMUSG00000003934 | -1.229266384 |
| 3131 | Gm45163       | ENSMUSG00000109419 | -1.230381694 |
| 3132 | Pfkfb1        | ENSMUSG00000025271 | -1.231363939 |
| 3133 | 2010107G23Rik | ENSMUSG00000020083 | -1.23169514  |
| 3134 | Rhobtb1       | ENSMUSG00000019944 | -1.235028161 |
| 3135 | 1810034E14Rik | ENSMUSG00000097101 | -1.239581107 |
| 3136 | mt-Ta         | ENSMUSG00000064347 | -1.242281225 |
| 3137 | Ldhb          | ENSMUSG00000030246 | -1.248140182 |
| 3138 | Gm2011        | ENSMUSG00000107741 | -1.249105324 |
| 3139 | Pkd2l2        | ENSMUSG00000014503 | -1.250439434 |
| 3140 | Ces1d         | ENSMUSG00000056973 | -1.251442559 |
| 3141 | Gstm6         | ENSMUSG00000068762 | -1.252661532 |
| 3142 | Dnajc28       | ENSMUSG00000039763 | -1.253106073 |
| 3143 | 4930452B06Rik | ENSMUSG00000021747 | -1.254686107 |
| 3144 | Gnb3          | ENSMUSG00000023439 | -1.255777476 |
| 3145 | Cst6          | ENSMUSG00000024846 | -1.2561602   |

|      |               |                    |              |
|------|---------------|--------------------|--------------|
| 3146 | Wipf3         | ENSMUSG00000086040 | -1.256386079 |
| 3147 | Mir133a-2     | ENSMUSG00000065460 | -1.257422183 |
| 3148 | Pxmp2         | ENSMUSG00000029499 | -1.257612863 |
| 3149 | Gm10603       | ENSMUSG00000099137 | -1.258981936 |
| 3150 | Gm8113        | ENSMUSG00000089901 | -1.263247821 |
| 3151 | Rom1          | ENSMUSG00000071648 | -1.26486349  |
| 3152 | Gm4956        | ENSMUSG00000025936 | -1.265433176 |
| 3153 | Gm826         | ENSMUSG00000074623 | -1.265694667 |
| 3154 | Gm11734       | ENSMUSG00000085419 | -1.266503712 |
| 3155 | Lrp1b         | ENSMUSG00000049252 | -1.266856005 |
| 3156 | Gm572         | ENSMUSG00000070577 | -1.268319908 |
| 3157 | Gm43672       | ENSMUSG00000106019 | -1.268807853 |
| 3158 | Rbfox1        | ENSMUSG00000008658 | -1.269620216 |
| 3159 | Gm20522       | ENSMUSG00000092241 | -1.272304916 |
| 3160 | Kcnk2         | ENSMUSG00000037624 | -1.273199588 |
| 3161 | BC037032      | ENSMUSG00000087221 | -1.282525456 |
| 3162 | Ech1          | ENSMUSG00000053898 | -1.285960757 |
| 3163 | Fabp3-ps1     | ENSMUSG00000056366 | -1.287005673 |
| 3164 | Slc46a3       | ENSMUSG00000029650 | -1.288590264 |
| 3165 | Glns-ps1      | ENSMUSG00000082100 | -1.28951477  |
| 3166 | Alox12        | ENSMUSG00000000320 | -1.292683326 |
| 3167 | Plekhh1       | ENSMUSG00000060716 | -1.294707791 |
| 3168 | Srrm4         | ENSMUSG00000063919 | -1.297778461 |
| 3169 | Arhgef19      | ENSMUSG00000028919 | -1.306615492 |
| 3170 | Myom2         | ENSMUSG00000031461 | -1.307139947 |
| 3171 | Slc25a20      | ENSMUSG00000032602 | -1.307349159 |
| 3172 | Kcnv2         | ENSMUSG00000047298 | -1.307793653 |
| 3173 | Sh2d4a        | ENSMUSG00000053886 | -1.311358263 |
| 3174 | Csdc2         | ENSMUSG00000042109 | -1.311590607 |
| 3175 | Smco1         | ENSMUSG00000046345 | -1.331318384 |
| 3176 | Fabp3         | ENSMUSG00000028773 | -1.335957877 |
| 3177 | Ptprn         | ENSMUSG00000026204 | -1.341673166 |
| 3178 | Map3k21       | ENSMUSG00000031853 | -1.348702929 |
| 3179 | Cacna1s       | ENSMUSG00000026407 | -1.356885022 |
| 3180 | Krt222        | ENSMUSG00000035849 | -1.357991658 |
| 3181 | Acad12        | ENSMUSG00000042647 | -1.36229579  |
| 3182 | Mfsd4b1       | ENSMUSG00000038522 | -1.362817899 |
| 3183 | Ccrl2         | ENSMUSG00000043953 | -1.365266828 |
| 3184 | Magix         | ENSMUSG00000031147 | -1.366433446 |
| 3185 | Mir208a       | ENSMUSG00000065432 | -1.369653349 |
| 3186 | Mccc1os       | ENSMUSG00000086392 | -1.373886049 |
| 3187 | Unc13a        | ENSMUSG00000034799 | -1.376024873 |
| 3188 | 4930458D05Rik | ENSMUSG00000087611 | -1.383346548 |
| 3189 | Plin5         | ENSMUSG00000011305 | -1.392322443 |
| 3190 | Pfn4          | ENSMUSG00000020639 | -1.394021192 |
| 3191 | Spata2l       | ENSMUSG00000033594 | -1.401642039 |
| 3192 | Plxnb3        | ENSMUSG00000031385 | -1.402146155 |

|      |               |                    |              |
|------|---------------|--------------------|--------------|
| 3193 | Capn3         | ENSMUSG00000079110 | -1.402187838 |
| 3194 | Ptgds         | ENSMUSG00000015090 | -1.405537765 |
| 3195 | Cmtm8         | ENSMUSG00000041012 | -1.405711428 |
| 3196 | Gfra4         | ENSMUSG00000027316 | -1.408922551 |
| 3197 | Nrn1          | ENSMUSG00000039114 | -1.417394585 |
| 3198 | E330011O21Rik | ENSMUSG00000109841 | -1.424155483 |
| 3199 | Tmem25        | ENSMUSG00000002032 | -1.424395886 |
| 3200 | Gm34302       | ENSMUSG00000103476 | -1.428462909 |
| 3201 | Gm10699       | ENSMUSG00000074461 | -1.430274418 |
| 3202 | Lrrc52        | ENSMUSG00000040485 | -1.432298226 |
| 3203 | Agbl2         | ENSMUSG00000040812 | -1.439180094 |
| 3204 | Tmod4         | ENSMUSG00000005628 | -1.440979157 |
| 3205 | Lrtm1         | ENSMUSG00000045776 | -1.452630127 |
| 3206 | Lgi3          | ENSMUSG00000033595 | -1.456746041 |
| 3207 | Foxred2       | ENSMUSG00000016552 | -1.457388753 |
| 3208 | Gm12519       | ENSMUSG00000085643 | -1.459198157 |
| 3209 | Nmb           | ENSMUSG00000025723 | -1.459632991 |
| 3210 | 9030612E09Rik | ENSMUSG00000045008 | -1.462111853 |
| 3211 | Ccdc189       | ENSMUSG00000057176 | -1.466492114 |
| 3212 | Gm20619       | ENSMUSG00000093482 | -1.470913864 |
| 3213 | P2ry1         | ENSMUSG00000027765 | -1.478547649 |
| 3214 | Dhrs3         | ENSMUSG00000066026 | -1.485480146 |
| 3215 | Rasd2         | ENSMUSG00000034472 | -1.502500427 |
| 3216 | Dcaf12l1      | ENSMUSG00000045284 | -1.50295348  |
| 3217 | Acy3          | ENSMUSG00000024866 | -1.505525483 |
| 3218 | Paqr9         | ENSMUSG00000064225 | -1.507219972 |
| 3219 | Kcna7         | ENSMUSG00000038201 | -1.51962661  |
| 3220 | Ky            | ENSMUSG00000035606 | -1.521105304 |
| 3221 | Cpt2          | ENSMUSG00000028607 | -1.546700563 |
| 3222 | Ociad2        | ENSMUSG00000029153 | -1.54931381  |
| 3223 | Klhl33        | ENSMUSG00000090799 | -1.551297275 |
| 3224 | P2rx6         | ENSMUSG00000022758 | -1.551666095 |
| 3225 | Hmgcs2        | ENSMUSG00000027875 | -1.555810995 |
| 3226 | Fah           | ENSMUSG00000030630 | -1.557877241 |
| 3227 | Tmem196       | ENSMUSG00000048004 | -1.557902735 |
| 3228 | Cyp1a1        | ENSMUSG00000032315 | -1.563510036 |
| 3229 | Gm5069        | ENSMUSG00000055676 | -1.583367073 |
| 3230 | 1500026H17Rik | ENSMUSG00000097383 | -1.595989867 |
| 3231 | Poln          | ENSMUSG00000045102 | -1.605717186 |
| 3232 | Ttll1         | ENSMUSG00000022442 | -1.618000571 |
| 3233 | Lrrc4b        | ENSMUSG00000047085 | -1.620767358 |
| 3234 | Pdp2          | ENSMUSG00000048371 | -1.622674208 |
| 3235 | Acsm5         | ENSMUSG00000030972 | -1.623060194 |
| 3236 | Lix1          | ENSMUSG00000047786 | -1.650475797 |
| 3237 | Rtn4r         | ENSMUSG00000043811 | -1.656677431 |
| 3238 | Tpd52l1       | ENSMUSG00000000296 | -1.677962008 |
| 3239 | Echdc3        | ENSMUSG00000039063 | -1.680348036 |



|      |               |                    |              |
|------|---------------|--------------------|--------------|
| 3240 | Armc2         | ENSMUSG00000071324 | -1.689499242 |
| 3241 | Mylk4         | ENSMUSG00000044951 | -1.713399449 |
| 3242 | Esrrb         | ENSMUSG00000021255 | -1.724388138 |
| 3243 | Gm20594       | ENSMUSG00000096887 | -1.729589199 |
| 3244 | Fn3k          | ENSMUSG00000025175 | -1.770367777 |
| 3245 | Pnck          | ENSMUSG00000002012 | -1.79339723  |
| 3246 | D7Ert443e     | ENSMUSG00000030994 | -1.794174424 |
| 3247 | A530016L24Rik | ENSMUSG00000043122 | -1.814446005 |
| 3248 | Uckl1os       | ENSMUSG00000010492 | -1.823225698 |
| 3249 | Nudt17        | ENSMUSG00000028100 | -1.833632626 |
| 3250 | Scgb1c1       | ENSMUSG00000038801 | -1.866522579 |
| 3251 | Scd4          | ENSMUSG00000050195 | -1.885374552 |
| 3252 | Ripor2        | ENSMUSG00000036006 | -1.906096489 |
| 3253 | Tmem82        | ENSMUSG00000043085 | -1.943550535 |
| 3254 | 9430062P05Rik | ENSMUSG00000104263 | -1.950562933 |
| 3255 | Bmp7          | ENSMUSG00000008999 | -1.951083338 |
| 3256 | Bdh1          | ENSMUSG00000046598 | -1.96275389  |
| 3257 | Igfals        | ENSMUSG00000046070 | -1.995145669 |
| 3258 | Ogdhl         | ENSMUSG00000021913 | -2.024478749 |
| 3259 | Gm45670       | ENSMUSG00000109635 | -2.027657599 |
| 3260 | Fbp2          | ENSMUSG00000021456 | -2.035397682 |
| 3261 | Myh7b         | ENSMUSG00000074652 | -2.05635109  |
| 3262 | Ucp3          | ENSMUSG00000032942 | -2.089765907 |
| 3263 | Gchfr         | ENSMUSG00000046814 | -2.106077278 |
| 3264 | Slc25a34      | ENSMUSG00000040740 | -2.121871686 |
| 3265 | Snai3         | ENSMUSG00000006587 | -2.140545121 |
| 3266 | B430212C06Rik | ENSMUSG00000046415 | -2.212029917 |
| 3267 | Lars2         | ENSMUSG00000035202 | -2.220350519 |
| 3268 | Angptl3       | ENSMUSG00000028553 | -2.261570039 |
| 3269 | Ano5          | ENSMUSG00000055489 | -2.265706879 |
| 3270 | Gm36670       | ENSMUSG00000109696 | -2.289250624 |
| 3271 | Clec18a       | ENSMUSG00000033633 | -2.41653806  |
| 3272 | Cngb3         | ENSMUSG00000056494 | -2.495569712 |
| 3273 | Aldob         | ENSMUSG00000028307 | -2.533973922 |
| 3274 | Lgals4        | ENSMUSG00000053964 | -2.549164923 |
| 3275 | Acot1         | ENSMUSG00000072949 | -2.630300791 |
| 3276 | Pde11a        | ENSMUSG00000075270 | -2.650558147 |
| 3277 | Slc15a2       | ENSMUSG00000022899 | -3.106933705 |

**Table IV: 7-day TAC echocardiographic parameters**

|               | Con Sham<br>(n = 5) | Con+Rheb Sham<br>(n = 5) | ATF6 cKO Sham<br>(n = 5) | ATF6 cKO+Rheb Sham<br>(n = 5) |
|---------------|---------------------|--------------------------|--------------------------|-------------------------------|
| FS (%)        | 31.47±4.07          | 33.63±1.68               | 28.61±2.54               | 28.28±1.67                    |
| EF (%)        | 59.40±5.61          | 63.18±2.30               | 55.60±4.07               | 54.94±2.72                    |
| LVEDV (μl)    | 55.61±9.30          | 56.30±2.97               | 59.41±3.99               | 75.90±6.83                    |
| LVESV (μl)    | 23.61±2.83          | 20.84±2.03               | 26.91±4.19               | 34.54±4.42                    |
| LVIDD (mm)    | 3.59±0.24           | 3.65±0.08                | 3.73±0.10                | 4.12±0.16                     |
| LVIDS (mm)    | 2.48±0.27           | 2.42±0.10                | 2.67±0.16                | 2.96±0.15                     |
| PWTD (mm)     | 0.72±0.06           | 0.68±0.05                | 0.93±0.08                | 0.72±0.08                     |
| PWTS (mm)     | 1.03±0.11           | 1.02±0.06                | 1.15±0.14                | 0.94±0.08                     |
| AWTD (mm)     | 0.91±0.07           | 0.87±0.02                | 0.92±0.08                | 0.83±0.03                     |
| AWTS (mm)     | 1.21±0.05           | 1.16±0.08                | 1.21±0.08                | 1.12±0.05                     |
| HR (bpm)      | 488±18.43           | 516±16.48                | 464±33.55                | 504±35.34                     |
| HW (mg)       | 138.60±7.91         | 134.75±2.55              | 137.73±3.05              | 161.60±8.84                   |
| BW (g)        | 26.14±0.97          | 26.64±0.43               | 27.13±0.26               | 28.05±0.65                    |
| TL (mm)       | 19.00±0.37          | 18.50±0.26               | 19.67±0.26               | 22.00±0.37                    |
| HW/BW (mg/g)  | 5.29±0.13           | 5.07±0.15                | 5.08±0.13                | 5.75±0.21                     |
| HW/TL (mg/mm) | 7.28±0.29           | 7.29±0.19                | 7.00±0.07                | 7.34±0.32                     |

|               | Con TAC<br>(n = 7)       | Con+Rheb TAC<br>(n = 8)   | ATF6 cKO TAC<br>(n = 7)    | ATF6 cKO+Rheb TAC<br>(n = 8) |
|---------------|--------------------------|---------------------------|----------------------------|------------------------------|
| FS (%)        | 29.73±2.25               | 31.60±1.08                | 17.71±2.20 <sup>1,2</sup>  | 26.25±1.07                   |
| EF (%)        | 57.77±1.54               | 60.57±1.54                | 37.25±4.15 <sup>1,2</sup>  | 52.41±1.88                   |
| LVEDV (μl)    | 46.54±4.61               | 50.55±2.03                | 61.26±4.53 <sup>2</sup>    | 52.73±5.77 <sup>1</sup>      |
| LVESV (μl)    | 19.71±1.81               | 19.92±1.08                | 38.91±4.66 <sup>1,2</sup>  | 25.46±3.78 <sup>2</sup>      |
| LVIDD (mm)    | 3.36±0.15                | 3.49±0.06 <sup>1</sup>    | 3.77±0.12 <sup>2</sup>     | 3.53±0.16 <sup>1</sup>       |
| LVIDS (mm)    | 2.36±0.13                | 2.39±0.05                 | 3.11±0.16 <sup>1,2</sup>   | 2.61±0.15 <sup>1</sup>       |
| PWTD (mm)     | 1.78±0.12 <sup>1</sup>   | 1.54±0.08 <sup>1</sup>    | 1.03±0.04 <sup>2</sup>     | 1.45±0.14 <sup>1</sup>       |
| PWTS (mm)     | 1.99±0.11 <sup>1</sup>   | 1.66±0.14 <sup>1</sup>    | 1.07±0.08 <sup>2</sup>     | 1.68±0.13 <sup>1</sup>       |
| AWTD (mm)     | 1.28±0.05 <sup>1</sup>   | 1.23±0.08 <sup>1</sup>    | 0.91±0.12 <sup>2</sup>     | 1.27±0.13 <sup>1</sup>       |
| AWTS (mm)     | 1.49±0.09 <sup>1</sup>   | 1.61±0.06 <sup>1</sup>    | 1.28±0.13 <sup>2</sup>     | 1.62±0.13 <sup>1</sup>       |
| HR (bpm)      | 523±9.02                 | 519±13.29                 | 505±13.20                  | 514±22.54                    |
| HW (mg)       | 212.44±3.89 <sup>1</sup> | 217.20±14.08 <sup>1</sup> | 176.89±7.44 <sup>1,2</sup> | 232.95±9.99 <sup>1,2</sup>   |
| BW (g)        | 24.34±0.66               | 23.99±0.51 <sup>1</sup>   | 25.63±0.47                 | 25.52±0.73 <sup>1</sup>      |
| TL (mm)       | 19.60±0.40               | 19.00±0.31                | 20.86±0.32                 | 20.17±0.44                   |
| HW/BW (mg/g)  | 8.75±0.24 <sup>1</sup>   | 9.10±0.69 <sup>1</sup>    | 6.90±0.27 <sup>1,2</sup>   | 9.15±0.39 <sup>1</sup>       |
| HW/TL (mg/mm) | 10.86±0.22 <sup>1</sup>  | 11.39±0.56 <sup>1</sup>   | 8.50±0.41 <sup>1,2</sup>   | 11.54±0.33 <sup>1</sup>      |

FS = fractional shortening

EF = ejection fraction

LVEDV = left ventricular end diastolic volume

LVESV = left ventricular end systolic volume

LVIDD = left ventricular inner diameter in diastole

LVIDS = left ventricular inner diameter in systole

PWTD = left ventricular posterior wall thickness in diastole

PWTS = left ventricular posterior wall thickness in systole

AWTD = left ventricular anterior wall thickness in diastole

AWTS = left ventricular anterior wall thickness in systole

HR = heart rate in beats per minute

HW = heart weight

BW = body weight

TL = tibia length

HW/BW = heart weight/body weight

HW/TL = heart weight/tibia length

Statistical analyses used a one-way ANOVA with a Newman-Keuls post-hoc analysis.

<sup>1</sup> = p ≤ 0.05 different from respective Sham

<sup>2</sup> = p ≤ 0.05 different from Con TAC

**Table V: TAC time course echocardiographic parameters for Wild-Type mice**

|               | Sham<br>(n = 4) | 3-Hours<br>TAC<br>(n = 4) | 2-Days<br>TAC<br>(n = 4) | 7-Days<br>TAC<br>(n = 4)  |
|---------------|-----------------|---------------------------|--------------------------|---------------------------|
| FS (%)        | 30.76±1.69      | 32.27±1.83                | 28.32±3.21               | 25.36±1.85                |
| EF (%)        | 59.11±2.58      | 61.40±2.64                | 54.95±4.98               | 50.51±3.00 <sup>1</sup>   |
| LVEDV (μl)    | 55.18±3.16      | 50.76±3.82                | 58.16±1.60               | 62.66±1.32 <sup>1</sup>   |
| LVESV (μl)    | 22.82±2.74      | 19.94±2.60                | 26.38±3.44               | 30.87±1.67 <sup>1</sup>   |
| LVIDD (mm)    | 3.62±0.08       | 3.49±0.11                 | 3.70±0.04                | 3.82±0.03 <sup>1</sup>    |
| LVIDS (mm)    | 2.51±0.11       | 2.37±0.13                 | 2.65±0.14                | 2.85±0.06 <sup>1</sup>    |
| PWTD (mm)     | 0.70±0.04       | 0.78±0.03                 | 0.91±0.12                | 1.30±0.05 <sup>1</sup>    |
| PWTS (mm)     | 1.03±0.04       | 1.12±0.06                 | 1.22±0.09                | 1.69±0.06 <sup>1</sup>    |
| AWTD (mm)     | 0.79±0.04       | 0.93±0.05                 | 1.03±0.05 <sup>1</sup>   | 1.50±0.04 <sup>1</sup>    |
| AWTS (mm)     | 1.10±0.04       | 1.22±0.06                 | 1.25±0.04                | 1.78±0.05 <sup>1</sup>    |
| HR (bpm)      | 517±11.32       | 503±13.78                 | 509±11.75                | 517±7.18                  |
| HW (mg)       | 121.05±5.23     | 158.95±4.05 <sup>1</sup>  | 162.90±3.39 <sup>1</sup> | 208.50±10.04 <sup>1</sup> |
| BW (g)        | 23.09±0.28      | 31.00±0.85 <sup>1</sup>   | 27.94±1.56 <sup>1</sup>  | 29.06±0.37 <sup>1</sup>   |
| TL (mm)       | 18.50±0.29      | 23.50±0.29 <sup>1</sup>   | 21.50±0.50 <sup>1</sup>  | 22.75±0.25 <sup>1</sup>   |
| HW/BW (mg/g)  | 5.24±0.22       | 5.13±0.06                 | 5.85±0.43                | 7.19±0.42 <sup>1</sup>    |
| HW/TL (mg/mm) | 6.54±0.21       | 6.76±0.10                 | 7.56±0.51 <sup>1</sup>   | 9.15±0.35 <sup>1</sup>    |

FS = fractional shortening

EF = ejection fraction

LVEDV = left ventricular end diastolic volume

LVESV = left ventricular end systolic volume

LVIDD = left ventricular inner diameter in diastole

LVIDS = left ventricular inner diameter in systole

PWTD = left ventricular posterior wall thickness in diastole

PWTS = left ventricular posterior wall thickness in systole

AWTD = left ventricular anterior wall thickness in diastole

AWTS = left ventricular anterior wall thickness in systole

HR = heart rate in beats per minute

HW = heart weight

BW = body weight

TL = tibia length

HW/BW = heart weight/body weight

HW/TL = heart weight/tibia length

Statistical analyses used a one-way ANOVA with a Newman-Keuls post-hoc analysis.

<sup>1</sup> =  $p \leq 0.05$  different from Sham

**Table VI: 3-hour TAC echocardiographic parameters for Con and ATF6 cKO mice**

|               | Con Sham<br>(n = 5) | ATF6 cKO Sham<br>(n = 4) | Con TAC<br>(n = 5)       | ATF6 cKO TAC<br>(n = 4)  |
|---------------|---------------------|--------------------------|--------------------------|--------------------------|
| FS (%)        | 34.06±2.95          | 33.88±3.13               | 31.91±1.57               | 31.59±3.66               |
| EF (%)        | 63.57±3.78          | 63.18±4.30               | 60.66±2.26               | 59.72±5.30               |
| LVEDV (μl)    | 51.52±3.83          | 58.55±2.44               | 61.47±4.92               | 63.15±5.20               |
| LVESV (μl)    | 18.28±1.23          | 21.79±3.28               | 24.33±2.86               | 26.21±5.31               |
| LVIDD (mm)    | 3.51±0.11           | 3.71±0.07                | 3.78±0.12                | 3.82±0.13                |
| LVIDS (mm)    | 2.30±0.06           | 2.46±0.15                | 2.57±0.12                | 2.63±0.23                |
| PWTD (mm)     | 0.84±0.08           | 0.76±0.07                | 0.72±0.05                | 0.81±0.06                |
| PWTS (mm)     | 0.90±0.23           | 1.16±0.18                | 1.08±0.05                | 1.16±0.07                |
| AWTD (mm)     | 0.86±0.10           | 0.90±0.09                | 0.88±0.04                | 0.93±0.04                |
| AWTS (mm)     | 1.77±0.16           | 1.24±0.08                | 1.21±0.04                | 1.22±0.04                |
| HR (bpm)      | 493±19.31           | 517±10.09                | 510±10.16                | 512±14.34                |
| HW (mg)       | 128.88±5.32         | 137.30±6.35              | 148.00±2.16 <sup>1</sup> | 152.78±6.37 <sup>1</sup> |
| BW (g)        | 24.58±0.88          | 25.88±1.04               | 26.58±0.40               | 28.16±0.65 <sup>1</sup>  |
| TL (mm)       | 19.40±0.51          | 19.00±0.41               | 21.00±0.32               | 21.75±0.48 <sup>1</sup>  |
| HW/BW (mg/g)  | 5.24±0.11           | 5.31±0.16                | 5.58±0.15                | 5.42±0.14                |
| HW/TL (mg/mm) | 6.65±0.25           | 7.23±0.23                | 7.06±0.16                | 7.02±0.22                |

FS = fractional shortening

EF = ejection fraction

LVEDV = left ventricular end diastolic volume

LVESV = left ventricular end systolic volume

LVIDD = left ventricular inner diameter in diastole

LVIDS = left ventricular inner diameter in systole

PWTD = left ventricular posterior wall thickness in diastole

PWTS = left ventricular posterior wall thickness in systole

AWTD = left ventricular anterior wall thickness in diastole

AWTS = left ventricular anterior wall thickness in systole

HR = heart rate in beats per minute

HW = heart weight

BW = body weight

TL = tibia length

HW/BW = heart weight/body weight

HW/TL = heart weight/tibia length

Statistical analyses used a one-way ANOVA with a Newman-Keuls post-hoc analysis.

<sup>1</sup> =  $p \leq 0.05$  different from respective Sham

<sup>2</sup> =  $p \leq 0.05$  different from Con TAC
